# Supplementary material for: Photo-induced spirocyclization of biaryl ynones with ammonium thiocyanate: access to thiocyanate-featured spiro[5,5]trienones
Source: Royal Society of Chemistry journal article supplement (doi:10.1039/d2gc03710f), 2022-11-25

## Supporting Information

### Photo-induced spirocyclization of biaryl ynones with ammonium thiocyanate: access to thiocyanate-featured spiro[5,5]trienones

Shiliu Chen,<sup>a</sup> Qinqin Yan,<sup>a</sup> Jie Fan,<sup>a</sup> Changyou Guo,<sup>a</sup> Lijun Li,<sup>\*a</sup> Zhong-Quan Liu<sup>\*b</sup> and Zejiang Li<sup>\*a</sup>

<sup>a</sup>Key Laboratory of Medicinal Chemistry and Molecular Diagnosis of the Ministry of Education, College of Chemistry & Environmental Science, Key Laboratory of Chemical Biology of Hebei Province, Hebei University, Baoding, Hebei, 071002, P. R. China. E-mail: lizejiang898@126.com, llj@hbu.edu.cn.

<sup>b</sup>Jiangsu Collaborative Innovation Center of Chinese Medicinal Resources Industrialization, College of Pharmacy, Nanjing University of Chinese Medicine, Nanjing, Jiangsu 210023, P. R. China; Email: liuzq@njucm.edu.cn.

|                                                                                 |    |
|---------------------------------------------------------------------------------|----|
| General Information.....                                                        | 2  |
| Typical procedure for the reaction.....                                         | 2  |
| Optimization of molar concentrations of product 1.....                          | 2  |
| Mechanistic study.....                                                          | 3  |
| Crystallographic details.....                                                   | 5  |
| Physical data and references for the following products.....                    | 7  |
| Copies of the <sup>1</sup> H NMR, <sup>13</sup> C NMR, <sup>19</sup> F NMR..... | 29 |

## General Information

$^1\text{H}$  and  $^{13}\text{C}$  NMR and  $^{19}\text{F}$  NMR spectra were recorded on a Bruker advance III 400 or 600 spectrometer in  $\text{CDCl}_3$  with TMS as the internal standard. High-resolution mass spectral analysis (HRMS) data were measured on a Waters Xevo G2-XS qTOF. All products were identified by  $^1\text{H}$  and  $^{13}\text{C}$  NMR, HRMS. The starting materials were purchased from Energy, Meryer, J&K Chemicals, or Aldrich and used without further purification.

## Typical procedure for the reaction

Reaction conditions: A mixture of biaryl ynones (1 equiv., 0.1 mmol),  $\text{NH}_4\text{SCN}$  (3 equiv., 0.3 mmol), fluorescein or rhodamine 6G (0.05 equiv., 0.005 mmol), DMAP (0.2 equiv., 0.02 mmol),  $\text{CH}_3\text{CN}$  (3.5 mL), was added into a 10 mL quartz tube, which was lighted by 18 W blue LEDs, rt. When the reaction system was finished via detected by TLC, the mixture was condensed under vacuum and purified by column chromatography to afford the desired products.

Table S1. Optimization of molar concentrations of product 1

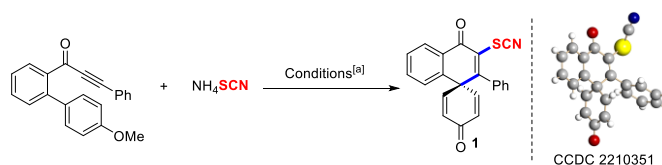

| Entry | Photocatalyst (mol %) | Thiocyanate (equiv.)        | Base (equiv.) | Solvent (mL)                 | Yield <sup>b</sup> (%) |
|-------|-----------------------|-----------------------------|---------------|------------------------------|------------------------|
| 1     | Fluorescein (5)       | $\text{NH}_4\text{SCN}$ (3) | DMAP (0.2)    | $\text{CH}_3\text{CN}$ (3.5) | 74                     |
| 2     | Fluorescein (5)       | $\text{NH}_4\text{SCN}$ (3) | DMAP (0.2)    | $\text{CH}_3\text{CN}$ (2.5) | 38                     |
| 3     | Fluorescein (5)       | $\text{NH}_4\text{SCN}$ (3) | DMAP (0.2)    | $\text{CH}_3\text{CN}$ (1.5) | 36                     |
| 4     | Fluorescein (5)       | $\text{NaSCN}$ (3)          | DMAP (0.2)    | $\text{CH}_3\text{CN}$ (3.5) | 70                     |
| 5     | Fluorescein (5)       | $\text{NaSCN}$ (3)          | DMAP (0.2)    | $\text{CH}_3\text{CN}$ (2.5) | 50                     |
| 6     | Fluorescein (5)       | $\text{NaSCN}$ (3)          | DMAP (0.2)    | $\text{CH}_3\text{CN}$ (1.5) | 36                     |
| 7     | Fluorescein (5)       | $\text{NH}_4\text{SCN}$ (3) | DMAP (0.2)    | DCE (3.5)                    | 72                     |
| 8     | Fluorescein (5)       | $\text{NH}_4\text{SCN}$ (3) | DMAP (0.2)    | DCE (2.5)                    | 48                     |
| 9     | Fluorescein (5)       | $\text{NH}_4\text{SCN}$ (3) | DMAP (0.2)    | DCE (1.5)                    | 40                     |

## Mechanistic study

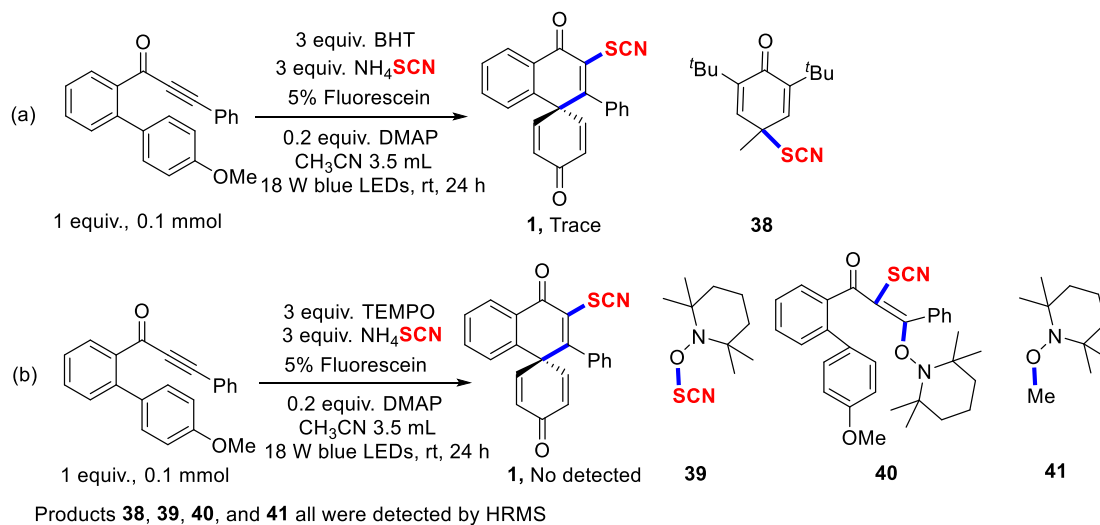

| Sample No. | Formula (M)                         | Ion Formula                         | Measured m/z | Calc m/z | Diff (ppm) |
|------------|-------------------------------------|-------------------------------------|--------------|----------|------------|
| 38         | C <sub>16</sub> H <sub>23</sub> NOS | C <sub>16</sub> H <sub>24</sub> NOS | 278.1578     | 278.1579 | -0.35      |

1929

pos\_1929\_486 (4.299) AM (Cen.4, 80.00, Ar.10000.0,0.00,0.00)

I: TOF MS ES+  
1.29e7

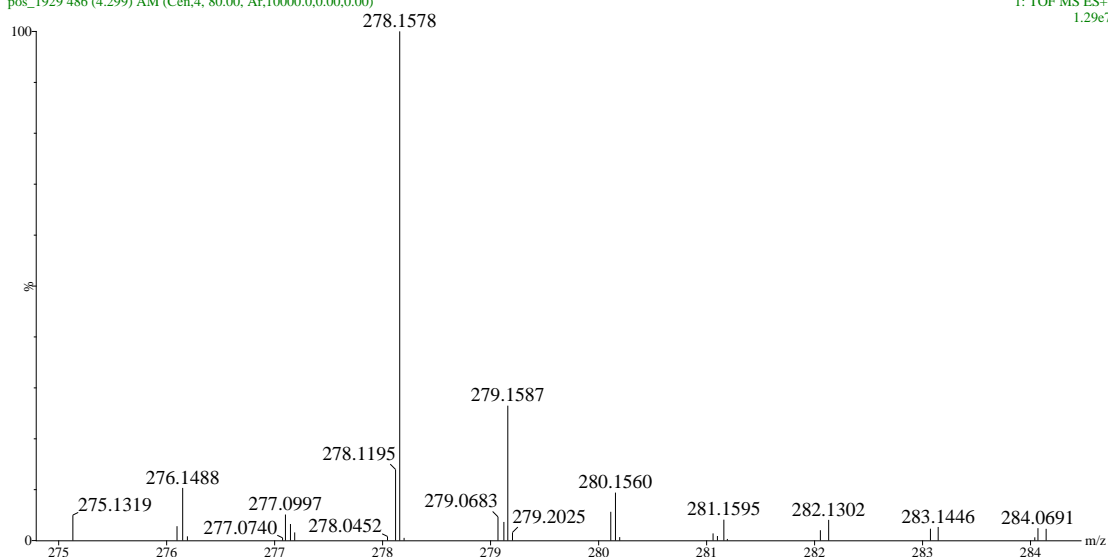

| Sample No. | Formula (M)                                                     | Ion Formula                                                     | Measured m/z | Calc m/z | Diff (ppm) |
|------------|-----------------------------------------------------------------|-----------------------------------------------------------------|--------------|----------|------------|
| 39         | C <sub>10</sub> H <sub>18</sub> N <sub>2</sub> O <sub>3</sub> S | C <sub>10</sub> H <sub>19</sub> N <sub>2</sub> O <sub>3</sub> S | 215.1214     | 215.1218 | -1.85      |

1930

pos\_1930 349 (3.091) AM (Cen,4, 80.00, Ar,10000.0,0.00,0.00); Cm (343:355)

I: TOF MS ES+  
4.43e6

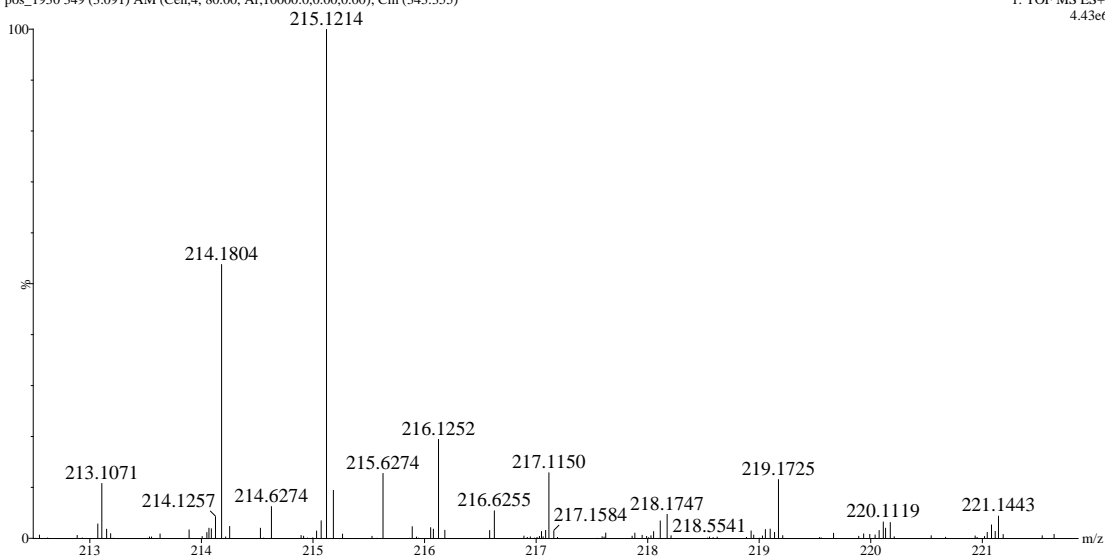

| Sample No. | Formula (M)                                                     | Ion Formula                                                     | Measured m/z | Calc m/z | Diff (ppm) |
|------------|-----------------------------------------------------------------|-----------------------------------------------------------------|--------------|----------|------------|
| 40         | C <sub>32</sub> H <sub>34</sub> N <sub>2</sub> O <sub>3</sub> S | C <sub>32</sub> H <sub>35</sub> N <sub>2</sub> O <sub>3</sub> S | 527.2369     | 527.2368 | 0.18       |

1930

pos\_1930 516 (4.556) Cm (516:518)

I: TOF MS ES+  
9.30e5

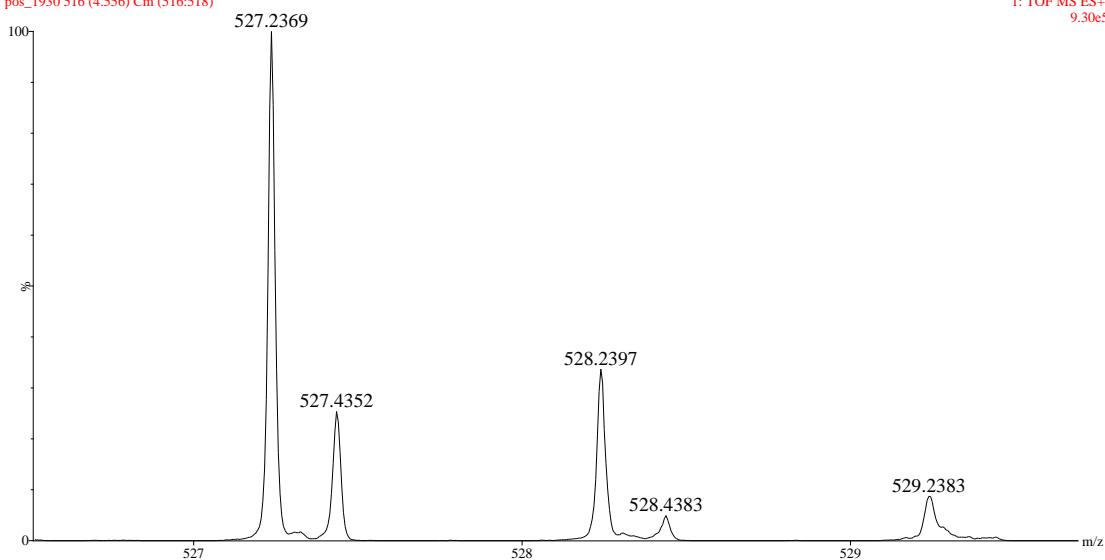

| Sample No. | Formula (M)                        | Ion Formula                        | Measured m/z | Calc m/z | Diff (ppm) |
|------------|------------------------------------|------------------------------------|--------------|----------|------------|
| 41         | C <sub>10</sub> H <sub>21</sub> NO | C <sub>10</sub> H <sub>22</sub> NO | 172.1699     | 172.1701 | -1.16      |

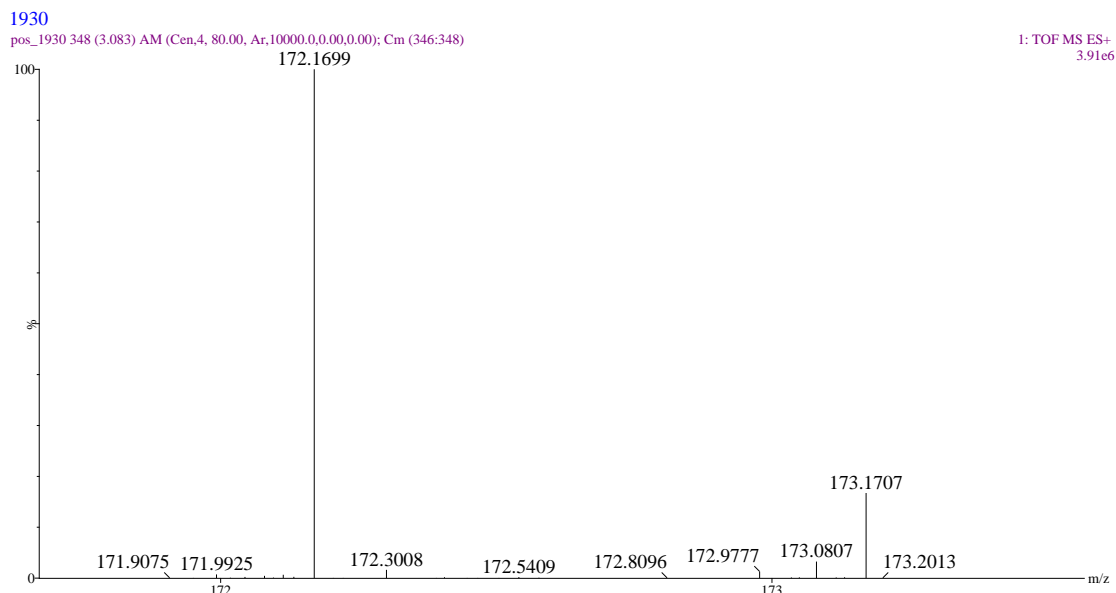

### Crystallographic details

(1) Product **1** was added to a 5 mL sample bottle, which was solved with 1 mL of dichloromethane (DCM). Then the above mixture was added with 2 mL of petroleum ether (PE). Next, we sealed the sample bottle and placed it in a dark cabinet. Finally, the crystal was precipitated via volatilizing.

(2) Single crystal of Product **1** [C<sub>22</sub>H<sub>13</sub>NO<sub>2</sub>S] was offered as follows: A proper crystal was used and detected on a “Bruker D8 VENTURE” diffractometer. The crystal stayed at 273.0 K during data collection. With the help of Shelxtl, the structure was solved with the XShell structure solution program using Charge Flipping, and it was refined with the SHELXL [1] refinement package using Least Squares minimisation. Finally, crystal data and structure refinement parameters are described as shown in **Table S2**.  
CCDC No. 2210351.

[1]. Sheldrick, G.M. (2015). Acta Cryst. C71, 3-8.

**Table S2.** Crystal data and structure refinement for product **1**.

---

|                                                                |                                                                                              |
|----------------------------------------------------------------|----------------------------------------------------------------------------------------------|
| CCDC                                                           | 2210351                                                                                      |
| Displacement ellipsoids are drawn at the 30% probability level |                                                                                              |
| Empirical formula                                              | C <sub>22</sub> H <sub>13</sub> N O <sub>2</sub> S                                           |
| Formula weight                                                 | 355.39                                                                                       |
| Temperature                                                    | 273 K                                                                                        |
| Wavelength                                                     | 0.71073 Å                                                                                    |
| Crystal system                                                 | Orthorhombic                                                                                 |
| Space group                                                    | Pna2 <sub>1</sub>                                                                            |
| Unit cell dimensions                                           | a = 11.7823(9) Å    α = 90 Å<br>b = 17.2564(12) Å    β = 90 Å<br>c = 8.5563(5) Å    γ = 90 Å |
| Volume                                                         | 1739.7(2) Å <sup>3</sup>                                                                     |
| Z                                                              | 4                                                                                            |
| Density (calculated)                                           | 1.357 Mg/m <sup>3</sup>                                                                      |
| Absorption coefficient                                         | 0.202 mm <sup>-1</sup>                                                                       |
| F(000)                                                         | 736                                                                                          |
| Crystal size                                                   | 0.450 x 0.250 x 0.220 mm <sup>3</sup>                                                        |
| Theta range for data collection                                | 2.093 to 26.782/°                                                                            |
| Index ranges                                                   | -14<=h<=14, -21<=k<=21, -10<=l<=9                                                            |
| Reflections collected                                          | 19380                                                                                        |
| Independent reflections                                        | 3566 [R(int) = 0.0393]                                                                       |
| Completeness to theta = 25.242°                                | 99.9 %                                                                                       |
| Absorption correction                                          | None                                                                                         |
| Refinement method                                              | Full-matrix least-squares on F <sup>2</sup>                                                  |
| Data / restraints / parameters                                 | 3566 / 1 / 235                                                                               |
| Goodness-of-fit on F <sup>2</sup>                              | 1.049                                                                                        |
| Final R indices [I>2sigma(I)]                                  | R1 = 0.0339, wR2 = 0.0732                                                                    |
| R indices (all data)                                           | R1 = 0.0415, wR2 = 0.0788                                                                    |
| Absolute structure parameter                                   | 0.10(3)                                                                                      |
| Largest diff. peak and hole                                    | 0.175 and -0.189 e.Å <sup>-3</sup>                                                           |

---

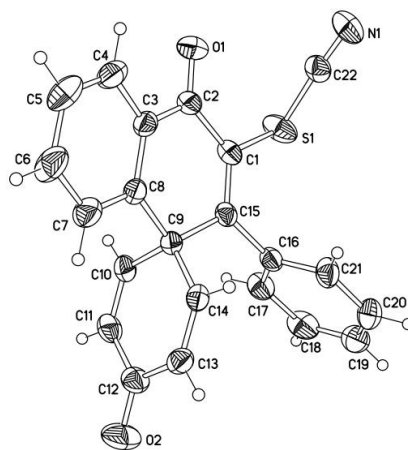

**Fig. S1** Structure of product **1**.

Physical data and references for the following products

**References:**

1. S. Chen, Q. Yan, J. Fan, Y. Gao, X. Yang, L.-J. Li, Z.-Q. Liu and Z.-J. Li, *Green Chem.*, 2022, **24**, 4742.
2. P. Yuan, Q. Zhang, X. Jin, W. Lei, L.-Z. Wu and Q. Liu, *Green Chem.*, 2018, **20**, 5464.
3. C. Xu, Z. He, X. Kang, Q.-L. Zeng, *Green Chem.*, 2021, **23**, 7544.
4. P. Natarajan, Priya and D. Chuskit, *Green Chem.*, 2021, **23**, 4873.

**Physical data for the following products:**

1. 2'-phenyl-3'-thiocyanato-4'H-spiro[cyclohexane-1,1'-naphthalene]-2,5-diene-4,4'-dione

A yellow solid after purification by flash column chromatography (petroleum ether/ethyl acetate = 3/1). 26.30 mg, 74% yield. Mp: 166-167 °C.

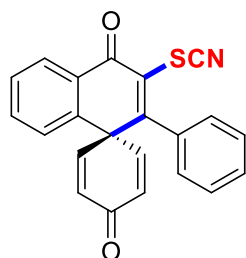

**<sup>1</sup>H NMR (400 MHz, CDCl<sub>3</sub>):** δ 8.33 (d, *J* = 7.6 Hz, 1H), 7.67 – 7.63 (m, 1H), 7.58 (t, *J* = 7.2 Hz, 1H), 7.43 – 7.37 (m, 3H), 7.30 (d, *J* = 7.6 Hz, 1H), 7.08 (d, *J* = 6.4 Hz, 2H), 6.74 (d, *J* = 10.0 Hz, 2H), 6.37 (d, *J* = 10.0 Hz, 2H).

**<sup>13</sup>C NMR (100 MHz, CDCl<sub>3</sub>):** δ 184.0, 177.3, 160.4, 146.6, 137.6, 135.0, 134.3, 130.9, 130.0, 129.8, 129.6, 129.3, 128.7, 128.5, 128.3, 127.1, 108.6, 52.5.

**HRMS (ESI, m/z):** Calculated for C<sub>22</sub>H<sub>14</sub>NO<sub>2</sub>S (M+H)<sup>+</sup> 356.0740, Measured 356.0747.

2. 3'-thiocyanato-2'-(p-tolyl)-4'H-spiro[cyclohexane-1,1'-naphthalene]-2,5-diene-4,4'-dione

A white solid after purification by flash column chromatography (petroleum ether/ethyl acetate = 3/1). 22.16 mg, 60% yield. Mp: 205-206 °C.

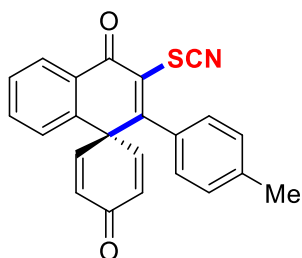

**<sup>1</sup>H NMR (400 MHz, CDCl<sub>3</sub>):** δ 8.34 (d, *J* = 7.6 Hz, 1H), 7.64 (t, *J* = 8.4 Hz, 1H), 7.58 (t, *J* = 7.6 Hz, 1H), 7.29 (d, *J* = 8.4 Hz, 1H), 7.18 (d, *J* = 8.0 Hz, 2H), 6.95 (d, *J* = 8.0 Hz, 2H), 6.71 (d, *J* = 10.0 Hz, 2H), 6.37 (d, *J* = 10.0 Hz, 2H), 2.37 (s, 3H).

**<sup>13</sup>C NMR (100 MHz, CDCl<sub>3</sub>):** δ 184.2, 177.3, 160.7, 146.7, 140.2, 137.6, 134.2, 132.2, 130.8, 129.7, 129.5, 129.4, 129.2, 128.6, 128.3, 127.0, 108.8, 52.6, 21.3.

**HRMS (ESI, m/z):** Calculated for C<sub>23</sub>H<sub>16</sub>NO<sub>2</sub>S (M+H)<sup>+</sup> 370.0896, Measured 370.0903.

3. 3'-thiocyanato-2'-(m-tolyl)-4'H-spiro[cyclohexane-1,1'-naphthalene]-2,5-diene-4,4'-dione

A yellow solid after purification by flash column chromatography (petroleum ether/ethyl acetate = 3/1). 24.01 mg, 65% yield. Mp: 185-186 °C.

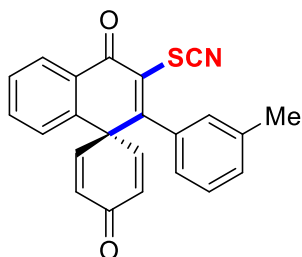

**<sup>1</sup>H NMR (400 MHz, CDCl<sub>3</sub>):** δ 8.35 (dd, *J* = 7.6, 1.6 Hz, 1H), 7.65 (t, *J* = 7.2 Hz, 1H), 7.59 (t, *J* = 8.0 Hz, 1H), 7.31 – 7.29 (m, 1H), 7.28 (d, *J* = 3.6 Hz, 1H), 7.24 (d, *J* = 8.0 Hz, 1H), 6.87 (s, 2H), 6.73 (d, *J* = 10.0 Hz, 2H), 6.38 (d, *J* = 8.4 Hz, 2H), 2.36 (s, 3H).

**<sup>13</sup>C NMR (100 MHz, CDCl<sub>3</sub>):** δ 184.2, 177.3, 160.6, 146.7, 138.4, 137.6, 135.0, 134.3, 130.8, 129.6, 129.5, 129.4, 128.6, 128.4, 128.2, 127.5, 124.1, 108.7, 52.5, 21.4.



**HRMS (ESI, m/z):** Calculated for C<sub>23</sub>H<sub>16</sub>NO<sub>2</sub>S (M+H)<sup>+</sup> 370.0896, Measured 370.0901.

4. 2'-(4-ethylphenyl)-3'-thiocyanato-4'H-spiro[cyclohexane-1,1'-naphthalene]-2,5-diene-4,4'-dione

A yellow solid after purification by flash column chromatography (petroleum ether/ethyl acetate = 3/1). 33.75 mg, 88% yield. Mp: 139-140 °C.

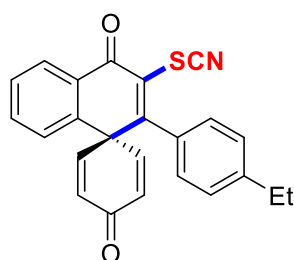

**<sup>1</sup>H NMR (400 MHz, CDCl<sub>3</sub>):** δ 8.34 (dd, *J* = 7.6, 1.6 Hz, 1H), 7.64 (t, *J* = 7.2 Hz, 1H), 7.58 (t, *J* = 7.6 Hz, 1H), 7.29 (d, *J* = 8.0 Hz, 1H), 7.20 (d, *J* = 8.4 Hz, 2H), 6.97 (d, *J* = 8.0 Hz, 2H), 6.71 (d, *J* = 10.0 Hz, 2H), 6.37 (d, *J* = 10.0 Hz, 2H), 2.67 (q, *J* = 7.6 Hz, 2H), 1.25 (t, *J* = 7.6 Hz, 3H).

**<sup>13</sup>C NMR (100 MHz, CDCl<sub>3</sub>):** δ 184.2, 177.4, 160.8, 146.8, 146.3, 137.6, 134.3, 132.4, 130.8, 129.7, 129.5, 129.4, 128.7, 128.2, 128.0, 127.0, 108.8, 52.6, 28.5, 14.9.

**HRMS (ESI, m/z):** Calculated for C<sub>24</sub>H<sub>18</sub>NO<sub>2</sub>S (M+H)<sup>+</sup> 384.1053, Measured 384.1061.

5. 2'-(4-(tert-butyl)phenyl)-3'-thiocyanato-4'H-spiro[cyclohexane-1,1'-naphthalene]-2,5-diene-4,4'-dione

A yellow solid after purification by flash column chromatography (petroleum ether/ethyl acetate = 3/1). 26.75 mg, 65% yield. Mp: 218-219 °C.

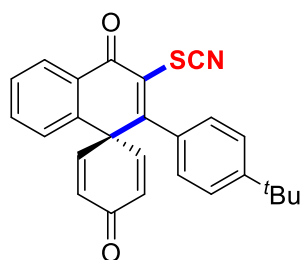

**<sup>1</sup>H NMR (400 MHz, CDCl<sub>3</sub>):** δ 8.33 (dd, *J* = 7.6, 1.6 Hz, 1H), 7.63 (t, *J* = 7.2 Hz, 1H), 7.57 (t, *J* = 7.6 Hz, 1H), 7.38 (d, *J* = 8.4 Hz, 2H), 7.29 (d, *J* = 8.0 Hz, 1H), 6.99 (d, *J* = 8.4 Hz, 2H), 6.72 (d, *J* = 10.4 Hz, 2H), 6.38 (d, *J* = 10.0 Hz, 2H), 1.31 (s, 9H).

**<sup>13</sup>C NMR (100 MHz, CDCl<sub>3</sub>):** δ 184.2, 177.3, 160.8, 153.3, 146.8, 137.6, 134.2, 132.3, 130.8, 129.7, 129.5, 129.4, 128.6, 128.2, 126.8, 125.4, 108.8, 52.6, 34.8, 31.1.

**HRMS (ESI, m/z):** Calculated for C<sub>26</sub>H<sub>22</sub>NO<sub>2</sub>S (M+H)<sup>+</sup> 412.1366, Measured 412.1370.

6. 2'-(4-methoxyphenyl)-3'-thiocyanato-4'H-spiro[cyclohexane-1,1'-naphthalene]-2,5-diene-4,4'-dione

A yellow solid after purification by flash column chromatography (petroleum ether/ethyl acetate = 3/1). 28.90 mg, 75% yield. Mp: 149-150 °C.

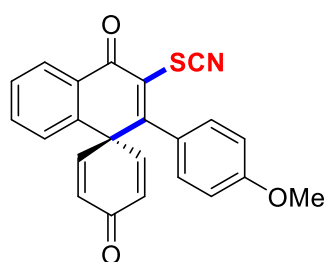

**<sup>1</sup>H NMR (400 MHz, CDCl<sub>3</sub>):** δ 8.31 (dd, *J* = 7.6, 1.2 Hz, 1H), 7.64 (t, *J* = 7.2 Hz, 1H), 7.57 (t, *J* = 7.6 Hz, 1H), 7.28 (d, *J* = 7.6 Hz, 1H), 7.01 (d, *J* = 8.8 Hz, 2H), 6.88 (d, *J* = 8.8 Hz, 2H), 6.71 (d, *J* = 10.0 Hz, 2H), 6.38 (d, *J* = 10.0 Hz, 2H), 3.82 (s, 3H).

**<sup>13</sup>C NMR (100 MHz, CDCl<sub>3</sub>):** δ 184.2, 177.4, 160.6, 160.3, 146.9, 137.6, 134.2, 130.7, 129.9, 129.4, 129.3, 128.6, 128.5, 128.2, 127.4, 113.9, 108.8, 55.2, 52.8.

**HRMS (ESI, m/z):** Calculated for C<sub>23</sub>H<sub>16</sub>NO<sub>3</sub>S (M+H)<sup>+</sup> 386.0845, Measured 386.0853.

7. 3'-thiocyanato-2'-(4-(trifluoromethyl)phenyl)-4'H-spiro[cyclohexane-1,1'-naphthalene]-2,5-diene-4,4'-dione

A yellow solid after purification by flash column chromatography (petroleum ether/ethyl acetate = 3/1). 22.44 mg, 53% yield. Mp: 178-179 °C.

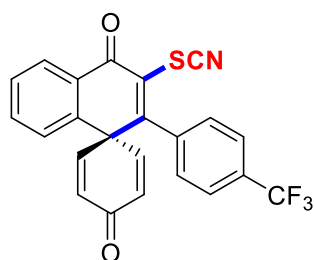

**<sup>1</sup>H NMR (400 MHz, CDCl<sub>3</sub>):** δ 8.31 (d, *J* = 8.0 Hz, 1H), 7.68 (t, *J* = 8.0 Hz, 3H), 7.60 (t, *J* = 7.2 Hz, 1H), 7.31 (d, *J* = 8.0 Hz, 1H), 7.27 (d, *J* = 8.0 Hz, 2H), 6.77 (d, *J* = 10.0 Hz, 2H), 6.41 (d, *J* = 10.0 Hz, 2H).

**<sup>13</sup>C NMR (100 MHz, CDCl<sub>3</sub>):** δ 183.6, 177.0, 159.0, 146.1, 138.2, 137.3, 134.6, 131.9 (q, *J* = 33.0 Hz), 131.1, 130.2, 129.7, 129.1, 128.7, 128.3, 127.9, 125.6 (q, *J* = 3.8 Hz), 123.4 (q, *J* = 271.2 Hz), 113.8, 108.2, 52.2.

**<sup>19</sup>F NMR (565 MHz, CDCl<sub>3</sub>):** δ -62.90 (s, 3F).

**HRMS (ESI, *m/z*):** Calculated for C<sub>23</sub>H<sub>13</sub>F<sub>3</sub>NO<sub>2</sub>S (M+H)<sup>+</sup> 424.0614, Measured 424.0632.

8. 2'-(3-fluorophenyl)-3'-thiocyanato-4'H-spiro[cyclohexane-1,1'-naphthalene]-2,5-diene-4,4'-dione

A yellow solid after purification by flash column chromatography (petroleum ether/ethyl acetate = 3/1). 25.02 mg, 67% yield. Mp: 194-195 °C.

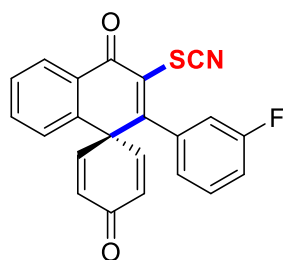

**<sup>1</sup>H NMR (400 MHz, CDCl<sub>3</sub>):** δ 8.36 (dd, *J* = 8.0, 1.6 Hz, 1H), 7.67 (t, *J* = 7.6 Hz, 1H), 7.60 (t, *J* = 8.0 Hz, 1H), 7.42 – 7.37 (m, 1H), 7.30 (d, *J* = 7.6 Hz, 1H), 7.15 (t, *J* = 8.8 Hz, 1H), 6.87 (d, *J* = 7.6 Hz, 1H), 6.81 (d, *J* = 8.8 Hz, 1H), 6.71 (dd, *J* = 10.0, 5.2 Hz, 2H), 6.41 (dd, *J* = 15.6, 9.6 Hz, 2H).

**<sup>13</sup>C NMR (150 MHz, CDCl<sub>3</sub>):** δ 183.8, 177.2, 162.2 (d, *J* = 248.4 Hz), 158.6 (d, *J* = 2.0 Hz), 146.32, 146.21, 137.50, 136.5 (d, *J* = 7.8 Hz), 134.5, 131.1 (d, *J* = 23.6 Hz), 130.6 (d, *J* = 8.2 Hz), 129.7, 129.2, 128.8, 128.3, 123.2 (d, *J* = 3.3 Hz), 117.2 (d, *J* = 20.8 Hz), 114.8 (d, *J* = 23.0 Hz), 108.2, 52.3.

**<sup>19</sup>F NMR (565 MHz, CDCl<sub>3</sub>):** δ -110.24 (s, 1F).

**HRMS (ESI, *m/z*):** Calculated for C<sub>22</sub>H<sub>13</sub>FNO<sub>2</sub>S (M+H)<sup>+</sup> 374.0645, Measured 374.0648.

9. 2'-(4-fluorophenyl)-3'-thiocyanato-4'H-spiro[cyclohexane-1,1'-naphthalene]-2,5-diene-4,4'-

dione

A yellow solid after purification by flash column chromatography (petroleum ether/ethyl acetate = 3/1). 25.76 mg, 69% yield. Mp: 218-219 °C.

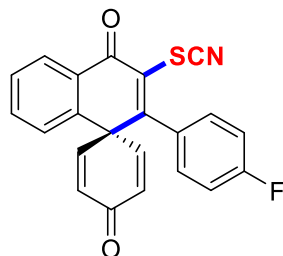

**<sup>1</sup>H NMR (400 MHz, CDCl<sub>3</sub>):** δ 8.32 (d, *J* = 7.6 Hz, 1H), 7.66 (d, *J* = 7.6 Hz, 1H), 7.59 (t, *J* = 7.6 Hz, 1H), 7.29 (d, *J* = 8.0 Hz, 1H), 7.10 (d, *J* = 6.4 Hz, 4H), 6.72 (d, *J* = 10.0 Hz, 2H), 6.39 (d, *J* = 10.0 Hz, 2H).

**<sup>13</sup>C NMR (100 MHz, CDCl<sub>3</sub>):** δ 183.8, 177.2, 163.2 (d, *J* = 250.3 Hz), 159.3, 146.4, 137.5, 134.4, 131.0, 129.6, 129.4 (d, *J* = 8.5 Hz), 129.2, 128.6, 128.3, 116.0, 115.8, 108.4, 52.5.

**<sup>19</sup>F NMR (565 MHz, CDCl<sub>3</sub>):** δ -109.42 (s, 1F).

**HRMS (ESI, m/z):** Calculated for C<sub>22</sub>H<sub>13</sub>FNO<sub>2</sub>S (M+H)<sup>+</sup> 374.0645, Measured 374.0651.

10. 2'-(4-chlorophenyl)-3'-thiocyanato-4'H-spiro[cyclohexane-1,1'-naphthalene]-2,5-diene-4,4'-dione

A yellow solid after purification by flash column chromatography (petroleum ether/ethyl acetate = 3/1). 22.61 mg, 58% yield. Mp: 184-185 °C.

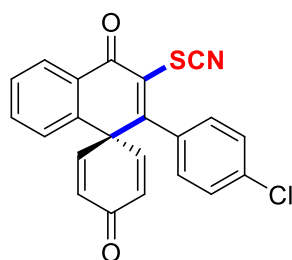

**<sup>1</sup>H NMR (400 MHz, CDCl<sub>3</sub>):** δ 8.33 (dd, *J* = 7.6, 1.6 Hz, 1H), 7.66 (t, *J* = 6.8 Hz, 1H), 7.59 (t, *J* = 7.6 Hz, 1H), 7.38 (d, *J* = 8.8 Hz, 2H), 7.29 (d, *J* = 8.0 Hz, 1H), 7.04 (d, *J* = 8.8 Hz, 2H), 6.70 (d, *J* = 10.0 Hz, 2H), 6.40 (d, *J* = 10.0 Hz, 2H).

**<sup>13</sup>C NMR (100 MHz, CDCl<sub>3</sub>):** δ 183.8, 177.2, 159.2, 146.3, 137.5, 136.3, 134.5, 133.2, 131.1, 130.3, 129.7, 129.2, 129.0, 128.7, 128.6, 128.3, 108.3, 52.4.

**HRMS (ESI, m/z):** Calculated for C<sub>22</sub>H<sub>13</sub>ClNO<sub>2</sub>S (M+H)<sup>+</sup> 390.0350, Measured 390.0352.

11. 2'-(4-bromophenyl)-3'-thiocyanato-4'H-spiro[cyclohexane-1,1'-naphthalene]-2,5-diene-4,4'-dione

A yellow liquid after purification by flash column chromatography (petroleum ether/ethyl acetate = 3/1). 31.27 mg, 72% yield.

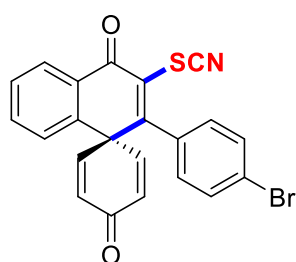

**<sup>1</sup>H NMR (400 MHz, CDCl<sub>3</sub>):** δ 8.32 (t, *J* = 8.0 Hz, 1H), 7.66 (t, *J* = 7.6 Hz, 1H), 7.59 (d, *J* = 7.6 Hz, 1H), 7.54 (dd, *J* = 8.4, 2.0 Hz, 2H), 7.29 (d, *J* = 8.0 Hz, 1H), 6.98 (d, *J* = 8.4 Hz, 2H), 6.71 (d, *J* = 10.0 Hz, 2H), 6.40 (d, *J* = 8.0 Hz, 2H).

**<sup>13</sup>C NMR (100 MHz, CDCl<sub>3</sub>):** δ 183.8, 177.1, 159.2, 146.3, 137.4, 134.5, 133.7, 131.9, 131.1, 130.1, 129.7, 129.2, 128.8, 128.7, 128.3, 124.5, 108.3, 52.31.

**HRMS (ESI, m/z):** Calculated for C<sub>22</sub>H<sub>13</sub>BrNO<sub>2</sub>S (M+H)<sup>+</sup> 435.9826, Measured 435.9847.

12. 3'-thiocyanato-2'-(thiophen-2-yl)-4'H-spiro[cyclohexane-1,1'-naphthalene]-2,5-diene-4,4'-dione

A yellow solid after purification by flash column chromatography (petroleum ether/ethyl acetate = 3/1). 23.85 mg, 66% yield. Mp: 197-198 °C.

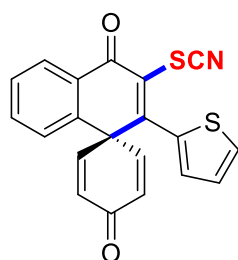

**<sup>1</sup>H NMR (400 MHz, CDCl<sub>3</sub>):** δ 8.33 (dd, *J* = 8.0, 1.6 Hz, 1H), 7.65 (t, *J* = 7.6 Hz, 1H), 7.58 (t, *J* = 7.6 Hz, 1H), 7.50 (dd, *J* = 5.2, 1.6 Hz, 1H), 7.30 (d, *J* = 8.0 Hz, 1H), 7.08 (t, *J* = 3.6 Hz, 1H), 7.03 (dd, *J* = 3.6, 1.2 Hz, 1H), 6.68 (d, *J* = 10.0 Hz, 2H), 6.47 (d, *J* = 10.0 Hz, 2H).

**<sup>13</sup>C NMR (100 MHz, CDCl<sub>3</sub>):** δ 184.2, 177.3, 152.6, 146.5, 137.4, 134.7, 134.4, 131.4, 131.3, 130.0, 129.6, 129.4, 129.1, 128.7, 128.4, 127.4, 108.4, 52.5.

**HRMS (ESI, *m/z*):** Calculated for C<sub>20</sub>H<sub>12</sub>NO<sub>2</sub>S<sub>2</sub> (M+H)<sup>+</sup> 362.0304, Measured 362.0314.

13. 2'-butyl-3'-thiocyanato-4'H-spiro[cyclohexane-1,1'-naphthalene]-2,5-diene-4,4'-dione

A yellow solid after purification by flash column chromatography (petroleum ether/ethyl acetate = 3/1). 21.80 mg, 65% yield. Mp: 124-125 °C.

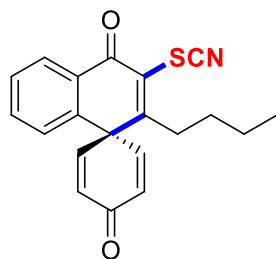

**<sup>1</sup>H NMR (400 MHz, CDCl<sub>3</sub>):** δ 8.31 (d, *J* = 7.6 Hz, 1H), 7.62 (t, *J* = 7.2 Hz, 1H), 7.55 (t, *J* = 7.2 Hz, 1H), 7.25 (d, *J* = 8.0 Hz, 1H), 6.62 (d, *J* = 2.0 Hz, 4H), 2.52 – 2.47 (m, 2H), 1.55 – 1.48 (m, 2H), 1.42 (q, *J* = 7.2 Hz, 2H), 0.93 (t, *J* = 7.2 Hz, 3H).

**<sup>13</sup>C NMR (100 MHz, CDCl<sub>3</sub>):** δ 184.4, 176.8, 164.2, 147.1, 137.0, 134.0, 131.1, 129.5, 129.3, 128.6, 128.2, 128.0, 108.8, 52.8, 34.1, 32.5, 23.1, 13.4.

**HRMS (ESI, *m/z*):** Calculated for C<sub>20</sub>H<sub>18</sub>NO<sub>2</sub>S (M+H)<sup>+</sup> 336.1053, Measured 336.1061.

14. 7'-methyl-2'-phenyl-3'-thiocyanato-4'H-spiro[cyclohexane-1,1'-naphthalene]-2,5-diene-4,4'-dione

A yellow solid after purification by flash column chromatography (petroleum ether/ethyl acetate = 3/1). 25.86 mg, 70% yield. Mp: 200-201 °C.

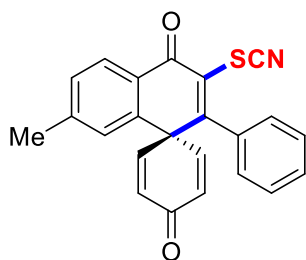

**$^1\text{H NMR}$  (400 MHz,  $\text{CDCl}_3$ ):**  $\delta$  8.22 (d,  $J = 8.0$  Hz, 1H), 7.42 – 7.36 (m, 4H), 7.07 – 7.04 (m, 3H), 6.71 (d,  $J = 9.2$  Hz, 2H), 6.36 (d,  $J = 10.0$  Hz, 2H), 2.41 (s, 3H).

**$^{13}\text{C NMR}$  (100 MHz,  $\text{CDCl}_3$ ):**  $\delta$  184.2, 177.1, 159.9, 146.8, 145.7, 137.6, 135.1, 130.8, 130.6, 129.9, 129.8, 128.7, 128.5, 128.4, 127.2, 127.0, 108.7, 52.4, 21.9.

**HRMS (ESI,  $m/z$ ):** Calculated for  $\text{C}_{23}\text{H}_{16}\text{NO}_2\text{S}$  ( $\text{M}+\text{H}$ ) $^+$  370.0896, Measured 370.0902.

15. 6'-nitro-2'-phenyl-3'-thiocyanato-4'H-spiro[cyclohexane-1,1'-naphthalene]-2,5-diene-4,4'-dione

A yellow solid after purification by flash column chromatography (petroleum ether/ethyl acetate = 3/1). 20.82 mg, 52% yield. Mp: 237-238 °C.

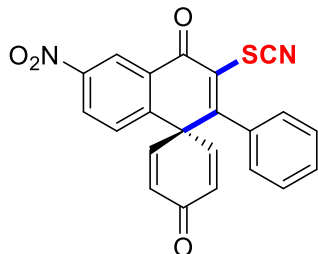

**$^1\text{H NMR}$  (400 MHz,  $\text{CDCl}_3$ ):**  $\delta$  9.12 (s, 1H), 8.44 (dd,  $J = 8.8, 2.8$  Hz, 1H), 7.52 (d,  $J = 8.4$  Hz, 1H), 7.47 – 7.41 (m, 3H), 7.08 (d,  $J = 7.6$  Hz, 2H), 6.74 (d,  $J = 8.8$  Hz, 2H), 6.45 (d,  $J = 10.0$  Hz, 2H).

**$^{13}\text{C NMR}$  (100 MHz,  $\text{CDCl}_3$ ):**  $\delta$  183.2, 175.8, 161.0, 148.4, 144.9, 143.7, 134.4, 131.8, 130.5, 130.4, 129.7, 128.7, 128.0, 127.0, 123.8, 108.0, 52.4.

**HRMS (ESI,  $m/z$ ):** Calculated for  $\text{C}_{22}\text{H}_{13}\text{N}_2\text{O}_4\text{S}$  ( $\text{M}+\text{H}$ ) $^+$  401.0591, Measured 401.0604.

16. 7'-fluoro-2'-phenyl-3'-thiocyanato-4'H-spiro[cyclohexane-1,1'-naphthalene]-2,5-diene-4,4'-dione

A yellow solid after purification by flash column chromatography (petroleum ether/ethyl acetate =

3/1). 28.38 mg, 76% yield. Mp: 217-218 °C.

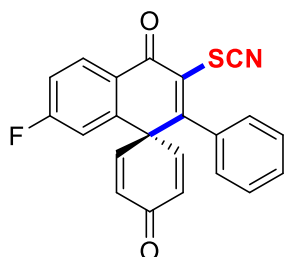

**<sup>1</sup>H NMR (400 MHz, CDCl<sub>3</sub>):** δ 8.37 (dd, *J* = 8.8, 5.6 Hz, 1H), 7.44 – 7.37 (m, 3H), 7.30 – 7.26 (m, 1H), 7.06 (dd, *J* = 8.0, 1.6 Hz, 2H), 6.96 (dd, *J* = 8.8, 2.4 Hz, 1H), 6.72 (d, *J* = 10.0 Hz, 2H), 6.39 (d, *J* = 10.0 Hz, 2H).

**<sup>13</sup>C NMR (100 MHz, CDCl<sub>3</sub>):** δ 183.6, 176.2, 166.0 (d, *J* = 257.4 Hz), 160.2, 145.9, 140.8 (d, *J* = 8.5 Hz), 134.8, 131.9 (d, *J* = 9.6 Hz), 131.2, 130.1, 129.7, 128.6, 127.1, 126.0 (d, *J* = 2.7 Hz), 117.7 (d, *J* = 22.1 Hz), 115.0 (d, *J* = 23.3 Hz), 108.4, 52.3.

**<sup>19</sup>F NMR (565 MHz, CDCl<sub>3</sub>):** δ -100.85 (s, 1F).

**HRMS (ESI, *m/z*):** Calculated for C<sub>22</sub>H<sub>13</sub>FNO<sub>2</sub>S (M+H)<sup>+</sup> 374.0645, Measured 374.0650.

17. 7'-chloro-2'-phenyl-3'-thiocyanato-4'H-spiro[cyclohexane-1,1'-naphthalene]-2,5-diene-4,4'-dione

A yellow solid after purification by flash column chromatography (petroleum ether/ethyl acetate = 3/1). 30.02 mg, 77% yield. Mp: 172-173 °C.

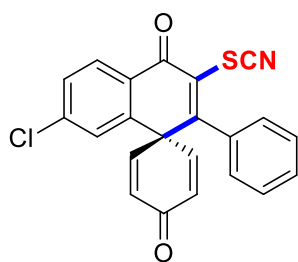

**<sup>1</sup>H NMR (400 MHz, CDCl<sub>3</sub>):** δ 8.27 (d, *J* = 8.4 Hz, 1H), 7.55 (dd, *J* = 8.4, 2.0 Hz, 1H), 7.44 – 7.37 (m, 3H), 7.24 (d, *J* = 2.0 Hz, 1H), 7.06 (d, *J* = 6.8 Hz, 2H), 6.71 (d, *J* = 10.0 Hz, 2H), 6.40 (d, *J* = 10.0 Hz, 2H).

**<sup>13</sup>C NMR (100 MHz, CDCl<sub>3</sub>):** δ 183.6, 176.5, 160.2, 145.8, 141.2, 139.4, 134.7, 131.3, 130.2, 130.1, 129.7, 128.6, 128.3, 127.7, 127.1, 108.4, 52.2.



**HRMS (ESI, m/z):** Calculated for C<sub>22</sub>H<sub>13</sub>ClNO<sub>2</sub>S (M+H)<sup>+</sup> 390.0350, Measured 390.0366.

18. 3'-phenyl-2'-thiocyanato-1'H-spiro[cyclohexane-1,4'-phenanthrene]-2,5-diene-1',4-dione

A yellow solid after purification by flash column chromatography (petroleum ether/ethyl acetate = 3/1). 23.92 mg, 59% yield. Mp: 238-239 °C.

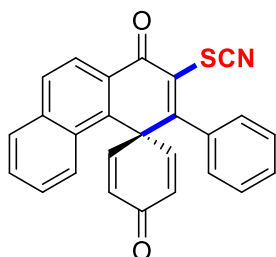

**<sup>1</sup>H NMR (400 MHz, CDCl<sub>3</sub>):** δ 8.46 (d, *J* = 8.4 Hz, 1H), 8.14 (d, *J* = 8.8 Hz, 1H), 8.10 (d, *J* = 8.8 Hz, 1H), 7.97 (d, *J* = 8.4 Hz, 1H), 7.66 (t, *J* = 8.0 Hz, 1H), 7.47 (t, *J* = 8.8 Hz, 1H), 7.43 – 7.36 (m, 3H), 7.00 (d, *J* = 6.8 Hz, 2H), 6.86 (d, *J* = 10.0 Hz, 2H), 6.54 (d, *J* = 9.6 Hz, 2H).

**<sup>13</sup>C NMR (100 MHz, CDCl<sub>3</sub>):** δ 183.3, 177.5, 158.8, 147.3, 136.4, 136.3, 133.4, 133.2, 131.5, 131.1, 130.3, 129.8, 129.7, 129.5, 129.0, 128.1, 127.7, 127.4, 125.8, 123.2, 108.6, 53.5.

**HRMS (ESI, m/z):** Calculated for C<sub>26</sub>H<sub>16</sub>NO<sub>2</sub>S (M+H)<sup>+</sup> 406.0902, Measured 406.0900.

19. 5-phenyl-6-thiocyanato-7H-spiro[benzo[b]thiophene-4,1'-cyclohexane]-2',5'-diene-4',7-dione

A yellow solid after purification by flash column chromatography (petroleum ether/ethyl acetate = 3/1). 20.60 mg, 57% yield. Mp: 197-198 °C.

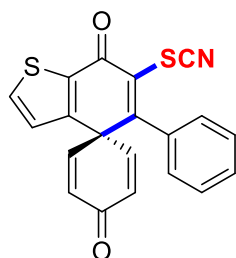

**<sup>1</sup>H NMR (400 MHz, CDCl<sub>3</sub>):** δ 7.80 (d, *J* = 4.8 Hz, 1H), 7.44 – 7.38 (m, 3H), 7.07 (d, *J* = 6.4 Hz, 2H), 6.90 (d, *J* = 4.8 Hz, 1H), 6.67 (d, *J* = 10.0 Hz, 2H), 6.38 (d, *J* = 10.0 Hz, 2H).

**<sup>13</sup>C NMR (100 MHz, CDCl<sub>3</sub>):** δ 183.7, 172.2, 160.6, 145.3, 144.7, 135.9, 135.4, 134.8, 131.3, 130.0, 129.6, 128.6, 127.4, 127.2, 108.4, 52.2.

**HRMS (ESI, m/z):** Calculated for C<sub>20</sub>H<sub>12</sub>NO<sub>2</sub>S<sub>2</sub> (M+H)<sup>+</sup> 362.0304, Measured 362.0315.

20. 3-methyl-2'-phenyl-3'-thiocyanato-4'H-spiro[cyclohexane-1,1'-naphthalene]-2,5-diene-4,4'-dione

A yellow solid after purification by flash column chromatography (petroleum ether/ethyl acetate = 3/1). 31.03 mg, 84% yield. Mp: 208-209 °C.

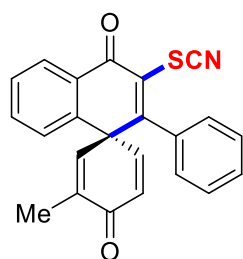

**<sup>1</sup>H NMR (400 MHz, CDCl<sub>3</sub>):** δ 8.33 (dd, *J* = 8.0, 1.6 Hz, 1H), 7.64 (t, *J* = 7.6 Hz, 1H), 7.57 (t, *J* = 7.6 Hz, 1H), 7.44 – 7.36 (m, 3H), 7.27 (d, *J* = 8.0 Hz, 1H), 7.06 – 7.02 (m, 2H), 6.70 (dd, *J* = 9.6, 2.8 Hz, 1H), 6.50 (s, 1H), 6.34 (d, *J* = 9.6 Hz, 1H), 1.86 (s, 3H).

**<sup>13</sup>C NMR (100 MHz, CDCl<sub>3</sub>):** δ 184.7, 177.4, 161.4, 146.1, 141.7, 138.4, 138.1, 135.1, 134.2, 130.7, 129.8, 129.3, 129.2, 128.5, 128.4, 128.2, 127.3, 126.9, 108.8, 52.7, 15.8.

**HRMS (ESI, m/z):** Calculated for C<sub>23</sub>H<sub>16</sub>NO<sub>2</sub>S (M+H)<sup>+</sup> 370.0896, Measured 370.0912.

21. 3,5-dimethyl-2'-phenyl-3'-thiocyanato-4'H-spiro[cyclohexane-1,1'-naphthalene]-2,5-diene-4,4'-dione

A yellow solid after purification by flash column chromatography (petroleum ether/ethyl acetate = 3/1). 27.23 mg, 71% yield. Mp: 207-208 °C.

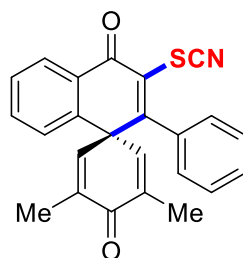

**<sup>1</sup>H NMR (400 MHz, CDCl<sub>3</sub>):** δ 8.32 (dd, *J* = 8.0, 1.6 Hz, 1H), 7.61 (t, *J* = 7.6 Hz, 1H), 7.55 (t, *J* = 7.6 Hz, 1H), 7.39 – 7.33 (m, 3H), 7.23 (d, *J* = 8.0 Hz, 1H), 6.99 (dd, *J* = 7.6, 1.2 Hz, 2H), 6.46 (s, 2H), 1.83 (s, 6H).

**<sup>13</sup>C NMR (100 MHz, CDCl<sub>3</sub>):** δ 185.3, 177.6, 162.4, 141.2, 139.3, 137.8, 135.2, 134.1, 129.6, 129.2, 129.1, 128.8, 128.4, 128.2, 128.1, 127.1, 108.9, 52.4, 16.0.

**HRMS (ESI, *m/z*):** Calculated for C<sub>24</sub>H<sub>18</sub>NO<sub>2</sub>S (M+H)<sup>+</sup> 384.1053, Measured 384.1060.

22. 2-methoxy-2'-phenyl-3'-thiocyanato-4'H-spiro[cyclohexane-1,1'-naphthalene]-2,5-diene-4,4'-dione

A yellow solid after purification by flash column chromatography (petroleum ether/ethyl acetate = 3/1). 24.28 mg, 63% yield. Mp: 215-216 °C.

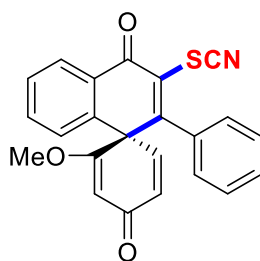

**<sup>1</sup>H NMR (400 MHz, CDCl<sub>3</sub>):** δ 8.34 (dd, *J* = 8.0, 2.0 Hz, 1H), 7.63 (t, *J* = 7.6 Hz, 1H), 7.58 (t, *J* = 6.8 Hz, 1H), 7.45 – 7.38 (m, 3H), 7.24 (d, *J* = 8.0 Hz, 1H), 7.08 (d, *J* = 7.2 Hz, 1H), 6.97 (s, 1H), 6.44 (d, *J* = 9.6 Hz, 1H), 6.32 (dd, *J* = 9.6, 1.2 Hz, 1H), 5.60 (d, *J* = 1.2 Hz, 1H), 3.59 (s, 3H).

**<sup>13</sup>C NMR (100 MHz, CDCl<sub>3</sub>):** δ 186.6, 177.6, 172.0, 160.2, 142.2, 138.3, 134.6, 134.3, 130.2, 130.0, 129.8, 129.5, 129.4, 128.8, 128.4, 127.0, 126.7, 108.8, 105.2, 56.2, 54.8.

**HRMS (ESI, *m/z*):** Calculated for C<sub>23</sub>H<sub>16</sub>NO<sub>3</sub>S (M+H)<sup>+</sup> 386.0845, Measured 386.0851.

23. 3-methoxy-2'-phenyl-3'-thiocyanato-4'H-spiro[cyclohexane-1,1'-naphthalene]-2,5-diene-4,4'-dione

A yellow solid after purification by flash column chromatography (petroleum ether/ethyl acetate = 3/1). 20.04 mg, 52% yield. Mp: 219-220 °C.

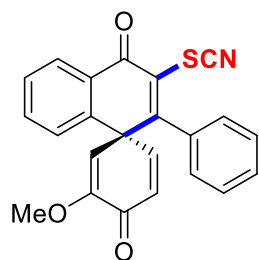

**$^1\text{H NMR}$  (400 MHz,  $\text{CDCl}_3$ ):**  $\delta$  8.30 (d,  $J = 8.0$  Hz, 1H), 7.63 (t,  $J = 7.6$  Hz, 1H), 7.56 (t,  $J = 7.6$  Hz, 1H), 7.43 – 7.36 (m, 3H), 7.30 (d,  $J = 8.0$  Hz, 1H), 7.05 (dd,  $J = 16.4$ , 7.2 Hz, 2H), 6.72 (dd,  $J = 10.0$ , 2.8 Hz, 1H), 6.38 (d,  $J = 9.6$  Hz, 1H), 5.69 (s, 1H), 3.63 (s, 3H).

**$^{13}\text{C NMR}$  (100 MHz,  $\text{CDCl}_3$ ):**  $\delta$  179.3, 177.4, 161.8, 152.6, 146.6, 139.1, 135.0, 134.3, 130.7, 129.9, 129.3, 129.1, 129.0, 128.5, 128.4, 128.3, 128.2, 127.2, 127.1, 114.6, 108.8, 55.3, 52.7.

**HRMS (ESI,  $m/z$ ):** Calculated for  $\text{C}_{23}\text{H}_{16}\text{NO}_3\text{S}$  ( $\text{M}+\text{H}$ ) $^+$  386.0845, Measured 386.0851.

24. 2,3-dimethoxy-2'-phenyl-3'-thiocyanato-4'H-spiro[cyclohexane-1,1'-naphthalene]-2,5-diene-4,4'-dione

A yellow solid after purification by flash column chromatography (petroleum ether/ethyl acetate = 3/1). 22.44 mg, 54% yield. Mp: 155-156 °C.

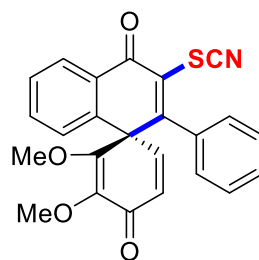

**$^1\text{H NMR}$  (400 MHz,  $\text{CDCl}_3$ ):**  $\delta$  8.34 (dd,  $J = 7.6$ , 1.6 Hz, 1H), 7.64 (t,  $J = 7.2$  Hz, 1H), 7.58 (t,  $J = 7.6$  Hz, 1H), 7.47 – 7.38 (m, 3H), 7.28 (d,  $J = 8.4$  Hz, 1H), 7.14 – 7.08 (m, 2H), 6.36 (d,  $J = 9.6$  Hz, 1H), 6.31 (d,  $J = 10.0$  Hz, 1H), 3.84 (s, 3H), 3.45 (s, 3H).

**$^{13}\text{C NMR}$  (100 MHz,  $\text{CDCl}_3$ ):**  $\delta$  183.6, 177.6, 160.6, 158.9, 141.4, 140.0, 138.5, 134.7, 134.2, 130.0, 129.9, 129.8, 129.3, 128.6, 128.5, 128.4, 127.2, 126.9, 126.7, 108.8, 61.3, 60.7, 56.8.

**HRMS (ESI, m/z):** Calculated for C<sub>24</sub>H<sub>18</sub>NO<sub>4</sub>S (M+H)<sup>+</sup> 416.0951, Measured 416.0960.

25. 2-fluoro-2'-phenyl-3'-thiocyanato-4'H-spiro[cyclohexane-1,1'-naphthalene]-2,5-diene-4,4'-dione

A yellow solid after purification by flash column chromatography (petroleum ether/ethyl acetate = 3/1). 19.42 mg, 52% yield. Mp: 214-215 °C.

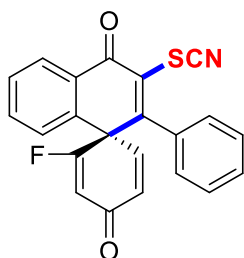

**<sup>1</sup>H NMR (400 MHz, CDCl<sub>3</sub>):** δ 8.38 (dd, *J* = 7.6, 1.6 Hz, 1H), 7.70 (t, *J* = 7.6 Hz, 1H), 7.65 (t, *J* = 7.6 Hz, 1H), 7.47 – 7.41 (m, 3H), 7.32 (dd, *J* = 7.6, 1.2 Hz, 1H), 7.10 (dd, *J* = 21.2, 8.4 Hz, 2H), 6.57 (t, *J* = 9.6 Hz, 1H), 6.35 (d, *J* = 9.6 Hz, 1H), 6.05 (dd, *J* = 13.2, 1.2 Hz, 1H).

**<sup>13</sup>C NMR (150 MHz, CDCl<sub>3</sub>):** δ 186.2 (d, *J* = 15.2 Hz), 177.0, 172.4 (d, *J* = 285.4 Hz), 157.0, 142.6 (d, *J* = 3.8 Hz), 135.3, 134.6, 133.8, 131.8, 130.4, 130.1, 130.0, 129.6, 129.1, 128.9, 128.6, 127.2, 127.0 (d, *J* = 24.8 Hz), 112.7 (d, *J* = 9.6 Hz), 108.2, 54.0 (d, *J* = 23.1 Hz).

**<sup>19</sup>F NMR (565 MHz, CDCl<sub>3</sub>):** δ -85.79 (s, 1F).

**HRMS (ESI, m/z):** Calculated for C<sub>22</sub>H<sub>13</sub>FNO<sub>2</sub>S (M+H)<sup>+</sup> 374.0645, Measured 374.0650.

26. 3-fluoro-2'-phenyl-3'-thiocyanato-4'H-spiro[cyclohexane-1,1'-naphthalene]-2,5-diene-4,4'-dione

A yellow solid after purification by flash column chromatography (petroleum ether/ethyl acetate = 3/1). 28.00 mg, 75% yield. Mp: 214-215 °C.

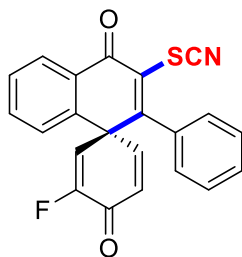

**$^1\text{H}$  NMR (400 MHz,  $\text{CDCl}_3$ ):**  $\delta$  8.34 (dd,  $J = 1.6, 8.0$  Hz, 1H), 7.68 (t,  $J = 7.2$  Hz, 1H), 7.61 (t,  $J = 7.6$  Hz, 1H), 7.46 – 7.40 (m, 3H), 7.32 (d,  $J = 8.0$  Hz, 1H), 7.07 (dd,  $J = 13.6, 6.4$  Hz, 2H), 6.74 (dd,  $J = 10.0, 2.8$  Hz, 1H), 6.41 – 6.34 (m, 2H).

**$^{13}\text{C}$  NMR (100 MHz,  $\text{CDCl}_3$ ):**  $\delta$  177.0, 176.9, 176.6, 159.4, 155.1 (d,  $J = 269.2$  Hz), 147.4, 136.9, 134.5 (d,  $J = 4.1$  Hz), 130.6 (d,  $J = 4.7$  Hz), 130.2, 130.1, 129.8, 129.1, 128.8, 128.7, 128.6, 128.0, 127.1 (d,  $J = 7.4$  Hz), 123.5, 123.3, 108.4, 53.0 (d,  $J = 6.5$  Hz)

**$^{19}\text{F}$  NMR (565 MHz,  $\text{CDCl}_3$ ):**  $\delta$  -124.82 (s, 1F).

**HRMS (ESI,  $m/z$ ):** Calculated for  $\text{C}_{22}\text{H}_{13}\text{FNO}_2\text{S}$  ( $\text{M}+\text{H}$ ) $^+$  374.0645, Measured 374.0655.

27. 3-chloro-2'-phenyl-3'-thiocyanato-4'H-spiro[cyclohexane-1,1'-naphthalene]-2,5-diene-4,4'-dione

A yellow solid after purification by flash column chromatography (petroleum ether/ethyl acetate = 3/1). 28.46 mg, 73% yield. Mp: 228-229 °C.

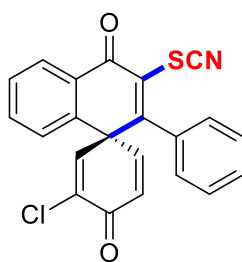

**$^1\text{H}$  NMR (400 MHz,  $\text{CDCl}_3$ ):**  $\delta$  8.35 (dd,  $J = 7.6, 1.6$  Hz, 1H), 7.69 (t,  $J = 7.6$  Hz, 1H), 7.62 (t,  $J = 7.6$  Hz, 1H), 7.46 – 7.41 (m, 3H), 7.29 (d,  $J = 8.0$  Hz, 1H), 7.05 (dd,  $J = 7.6, 1.6$  Hz, 2H), 6.92 (d,  $J = 2.8$  Hz, 1H), 6.75 (dd,  $J = 10.0, 2.8$  Hz, 1H), 6.43 (d,  $J = 9.6$  Hz, 1H).

**$^{13}\text{C}$  NMR (100 MHz,  $\text{CDCl}_3$ ):**  $\delta$  177.1, 177.0, 159.0, 146.8, 142.2, 136.6, 135.3, 134.6, 134.4, 130.2, 129.9, 129.2, 128.9, 128.7, 128.2, 127.3, 126.9, 108.4, 54.1.

**HRMS (ESI, m/z):** Calculated for C<sub>22</sub>H<sub>13</sub>ClNO<sub>2</sub>S (M+H)<sup>+</sup> 390.0350, Measured 390.0367.

28. 3-(hydroxymethyl)-2'-phenyl-3'-thiocyanato-4'H-spiro[cyclohexane-1,1'-naphthalene]-2,5-diene-4,4'-dione

A yellow solid after purification by flash column chromatography (petroleum ether/ethyl acetate = 3/1). 24.66 mg, 64% yield. Mp: 139-140 °C.

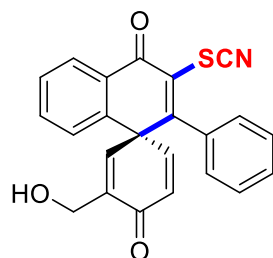

**<sup>1</sup>H NMR (400 MHz, CDCl<sub>3</sub>):** δ 8.36 (dd, *J* = 7.6, 1.6 Hz, 1H), 7.64 (t, *J* = 6.8 Hz, 1H), 7.59 (t, *J* = 7.6 Hz, 1H), 7.43 – 7.37 (m, 3H), 7.26 (d, *J* = 8.4 Hz, 1H), 7.05 (d, *J* = 8.0 Hz, 2H), 6.76 (dd, *J* = 10.0, 3.2 Hz, 1H), 6.73 (s, 1H), 6.36 (d, *J* = 9.6 Hz, 1H), 4.37 (d, *J* = 14.4 Hz, 1H), 4.30 (d, *J* = 14.8 Hz, 1H).

**<sup>13</sup>C NMR (100 MHz, CDCl<sub>3</sub>):** δ 184.6, 177.4, 160.6, 146.9, 141.6, 139.9, 137.7, 134.9, 134.3, 130.7, 129.9, 129.7, 129.5, 129.3, 128.7, 128.4, 128.2, 127.3, 127.0, 108.7, 60.4, 52.5.

**HRMS (ESI, m/z):** Calculated for C<sub>23</sub>H<sub>16</sub>NO<sub>3</sub>S (M+H)<sup>+</sup> 386.0845, Measured 386.0848.

29. 4,4'-dioxo-2'-phenyl-3'-thiocyanato-4'H-spiro[cyclohexane-1,1'-naphthalene]-2,5-diene-3-carbaldehyde

A yellow solid after purification by flash column chromatography (petroleum ether/ethyl acetate = 3/1). 14.95 mg, 39% yield. Mp: 87-88 °C.

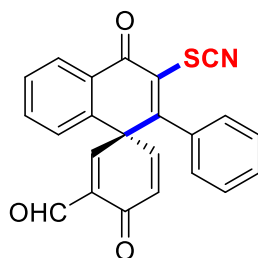

**<sup>1</sup>H NMR (400 MHz, CDCl<sub>3</sub>):** δ 10.10 (s, 1H), 8.42 – 8.39 (m, 1H), 7.68 – 7.62 (m, 2H), 7.44 – 7.37 (m, 4H), 7.17 (dd, *J* = 6.0, 2.4 Hz, 1H), 7.07 (d, *J* = 6.8 Hz, 1H), 6.93 (d, *J* = 7.6 Hz, 1H), 6.81 (dd, *J* = 10.0, 3.2 Hz, 1H), 6.47 (d, *J* = 10.0 Hz, 1H).

**<sup>13</sup>C NMR (100 MHz, CDCl<sub>3</sub>):** δ 187.8, 182.8, 176.9, 158.2, 150.7, 146.6, 136.0, 134.6, 134.4, 133.5, 131.0, 130.7, 130.3, 130.2, 129.3, 129.2, 128.8, 128.4, 127.2, 126.7, 108.2, 52.4.

**HRMS (ESI, *m/z*):** Calculated for C<sub>23</sub>H<sub>14</sub>NO<sub>3</sub>S (M+H)<sup>+</sup> 384.0694, Measured 384.0691.

30. 2-methyl-2'-phenyl-3'-thiocyanato-4'H-spiro[cyclohexane-1,1'-naphthalene]-2,5-diene-4,4'-dione

A yellow solid after purification by flash column chromatography (petroleum ether/ethyl acetate = 3/1). 24.01 mg, 65% yield. Mp: 197-198 °C.

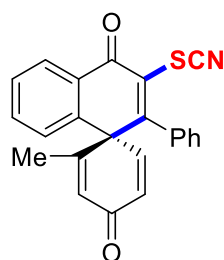

**<sup>1</sup>H NMR (400 MHz, CDCl<sub>3</sub>):** δ 8.36 (dd, *J* = 7.6, 1.6 Hz, 1H), 7.65 (t, *J* = 7.2 Hz, 1H), 7.59 (t, *J* = 7.6 Hz, 1H), 7.42 (d, *J* = 7.2 Hz, 1H), 7.38 (t, *J* = 7.2 Hz, 2H), 7.17 (dd, *J* = 7.6, 1.2 Hz, 1H), 7.07 – 7.02 (m, 2H), 6.68 (d, *J* = 9.6 Hz, 1H), 6.35 (dd, *J* = 10.0, 1.6 Hz, 1H), 6.28 (s, 1H), 1.73 (d, *J* = 1.6 Hz, 3H).

**<sup>13</sup>C NMR (100 MHz, CDCl<sub>3</sub>):** δ 184.9, 177.5, 160.6, 155.3, 146.6, 138.7, 134.6, 131.1, 130.7, 130.2, 129.9, 129.7, 129.5, 128.7, 128.6, 128.5, 127.6, 127.5, 108.7, 55.8, 20.3.

**HRMS (ESI, *m/z*):** Calculated for C<sub>23</sub>H<sub>16</sub>NO<sub>2</sub>S (M+H)<sup>+</sup> 370.0896, Measured 370.0899.

31. 4-phenyl-3-thiocyanato-2H-chromen-2-one

A yellow solid after purification by flash column chromatography (petroleum ether/ethyl acetate = 3/1). 14.24 mg, 51% yield. Mp: 134-135 °C.



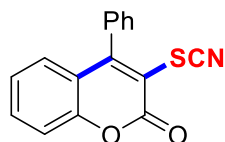

**$^1\text{H NMR}$  (400 MHz,  $\text{CDCl}_3$ ):**  $\delta$  7.68 – 7.61 (m, 4H), 7.46 (d,  $J = 8.4$  Hz, 1H), 7.32 (dd,  $J = 7.2, 3.6$  Hz, 2H), 7.26 (t,  $J = 6.8$  Hz, 1H), 7.16 (d,  $J = 8.0$  Hz, 1H).

**$^{13}\text{C NMR}$  (100 MHz,  $\text{CDCl}_3$ ):**  $\delta$  160.8, 157.3, 153.5, 134.0, 133.1, 130.3, 129.2, 128.6, 128.0, 125.0, 119.7, 117.2, 112.7, 108.1.

**HRMS (ESI,  $m/z$ ):** Calculated for  $\text{C}_{16}\text{H}_{10}\text{NO}_2\text{S}$  ( $\text{M}+\text{H}$ ) $^+$  280.0427, Measured 280.0436.

32. 3-methoxy-5-methyl-5-(thiocyanatomethyl)benzo[4,5]imidazo[2,1-a]isoquinolin-6(5H)-one

A yellow solid after purification by flash column chromatography (petroleum ether/ethyl acetate = 3/1). 19.92 mg, 57% yield. Mp: 148-149 °C.

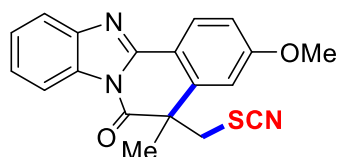

**$^1\text{H NMR}$  (400 MHz,  $\text{CDCl}_3$ ):**  $\delta$  8.48 (d,  $J = 8.8$  Hz, 1H), 8.30 (d,  $J = 7.2$  Hz, 1H), 7.79 (d,  $J = 7.2$  Hz, 1H), 7.47 – 7.39 (m, 2H), 7.13 (dd,  $J = 8.8, 2.4$  Hz, 1H), 6.93 (d,  $J = 2.4$  Hz, 1H), 3.96 (d,  $J = 13.2$  Hz, 1H), 3.94 (s, 3H), 3.65 (d,  $J = 13.2$  Hz, 1H), 1.83 (s, 3H).

**$^{13}\text{C NMR}$  (100 MHz,  $\text{CDCl}_3$ ):**  $\delta$  170.4, 162.9, 149.2, 144.1, 139.2, 131.0, 128.6, 126.3, 125.5, 119.6, 116.1, 115.5, 114.7, 112.1, 110.5, 55.7, 50.5, 43.3, 29.2.

**HRMS (ESI,  $m/z$ ):** Calculated for  $\text{C}_{19}\text{H}_{16}\text{N}_3\text{O}_2\text{S}$  ( $\text{M}+\text{H}$ ) $^+$  350.0958, Measured 350.0972.

33. 1-acetyl-3-methyl-5-phenyl-3-(thiocyanatomethyl)-1,3-dihydro-2H-pyrrol-2-one

A yellow liquid after purification by flash column chromatography (petroleum ether/ethyl acetate = 5/1). 14.03 mg, 49% yield.

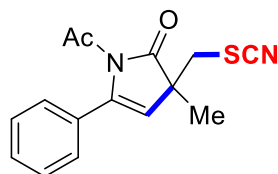

**<sup>1</sup>H NMR (400 MHz, CDCl<sub>3</sub>):** δ 7.39 – 7.37 (m, 3H), 7.31 (dd, *J* = 7.2, 3.6 Hz, 2H), 5.51 (s, 1H), 3.30 (d, *J* = 13.6 Hz, 1H), 3.26 (d, *J* = 13.2 Hz, 1H), 2.59 (s, 3H), 1.48 (s, 3H).

**<sup>13</sup>C NMR (100 MHz, CDCl<sub>3</sub>):** δ 179.5, 169.0, 144.8, 132.2, 129.2, 128.8, 128.0, 126.9, 123.5, 114.5, 111.7, 51.8, 40.4, 26.2, 22.4.

**HRMS (ESI, *m/z*):** Calculated for C<sub>15</sub>H<sub>14</sub>N<sub>2</sub>O<sub>2</sub>SNa (M+Na)<sup>+</sup> 309.0668, Measured 309.0674.

34. 1-acetyl-5-(4-bromophenyl)-3-methyl-3-(thiocyanatomethyl)-1,3-dihydro-2H-pyrrol-2-one

A yellow liquid after purification by flash column chromatography (petroleum ether/ethyl acetate = 5/1). 15.34 mg, 42% yield.

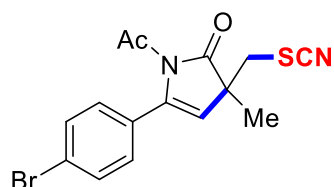

**<sup>1</sup>H NMR (400 MHz, CDCl<sub>3</sub>):** δ 7.50 (d, *J* = 8.4 Hz, 2H), 7.19 (d, *J* = 8.4 Hz, 2H), 5.53 (s, 1H), 3.29 (d, *J* = 13.6 Hz, 1H), 3.25 (d, *J* = 13.2 Hz, 1H), 2.59 (s, 3H), 1.47 (s, 3H).

**<sup>13</sup>C NMR (100 MHz, CDCl<sub>3</sub>):** δ 179.2, 169.0, 143.8, 131.2, 128.5, 122.9, 115.1, 111.6, 51.9, 40.3, 26.2, 22.4.

**HRMS (ESI, *m/z*):** Calculated for C<sub>15</sub>H<sub>13</sub>BrN<sub>2</sub>O<sub>2</sub>SNa (M+Na)<sup>+</sup> 386.9773, Measured 386.9776.

35. 1-acetyl-3-methyl-3-(thiocyanatomethyl)-5-(4-(trifluoromethyl)phenyl)-1,3-dihydro-2H-pyrrol-2-one

A yellow liquid after purification by flash column chromatography (petroleum ether/ethyl acetate = 3/1). 15.23 mg, 43% yield.

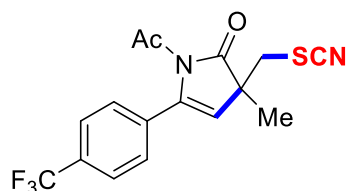

**<sup>1</sup>H NMR (400 MHz, CDCl<sub>3</sub>):** δ 7.63 (d, *J* = 8.4 Hz, 2H), 7.44 (d, *J* = 8.0 Hz, 2H), 5.60 (s, 1H), 3.30 (d, *J* = 13.6 Hz, 1H), 3.26 (d, *J* = 13.6 Hz, 1H), 2.60 (s, 3H), 1.50 (s, 3H).

**<sup>13</sup>C NMR (100 MHz, CDCl<sub>3</sub>):** δ 179.1, 168.9, 143.6, 135.9, 130.7 (q, *J* = 32.6 Hz), 127.3, 125.0 (d, *J* = 3.7 Hz), 124.1, 123.9 (q, *J* = 270.9 Hz), 116.1, 111.6, 52.1, 40.2, 26.1, 22.4.

**<sup>19</sup>F NMR (565 MHz, CDCl<sub>3</sub>):** δ -62.75 (s, 3F).

**HRMS (ESI, m/z):** Calculated for C<sub>16</sub>H<sub>13</sub>F<sub>3</sub>N<sub>2</sub>O<sub>2</sub>SNa (M+Na)<sup>+</sup> 377.0542, Measured 377.0551.

36. 2'-phenyl-3'-((phenylethynyl)thio)-4'H-spiro[cyclohexane-1,1'-naphthalene]-2,5-diene-4,4'-dione

A yellow solid after purification by flash column chromatography (petroleum ether/ethyl acetate = 3/1). 32.28 mg, 75% yield.

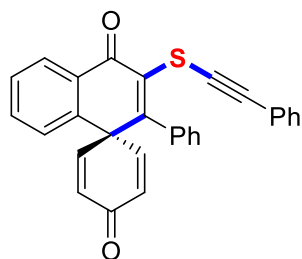

**<sup>1</sup>H NMR (400 MHz, CDCl<sub>3</sub>):** δ 8.34 (dd, *J* = 7.6, 2.0 Hz, 1H), 7.62 – 7.54 (m, 2H), 7.34 – 7.29 (m, 6H), 7.26 – 7.24 (m, 3H), 7.15 (dd, *J* = 6.0, 2.4 Hz, 2H), 6.75 (d, *J* = 10.0 Hz, 2H), 6.34 (d, *J* = 10.0 Hz, 2H).

**<sup>13</sup>C NMR (100 MHz, CDCl<sub>3</sub>):** δ 184.6, 179.0, 155.9, 148.0, 137.6, 135.7, 134.9, 133.6, 131.8, 130.3, 130.0, 129.2, 129.1, 128.4, 128.2, 128.1, 128.0, 127.6, 122.9, 93.9, 75.7, 52.2.

**HRMS (ESI, m/z):** Calculated for C<sub>29</sub>H<sub>19</sub>O<sub>2</sub>S (M+H)<sup>+</sup> 431.1106, Measured 431.1108.

37. 2'-phenyl-3'-((trifluoromethyl)thio)-4'H-spiro[cyclohexane-1,1'-naphthalene]-2,5-diene-4,4'-dione

A yellow solid after purification by flash column chromatography (petroleum ether/ethyl acetate = 3/1). 27.49 mg, 69% yield. Mp: 169-170 °C.

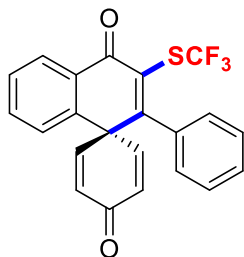

**<sup>1</sup>H NMR (400 MHz, CDCl<sub>3</sub>):** δ 8.35 (dd, *J* = 7.6, 1.6 Hz, 1H), 7.63 (t, *J* = 8.0 Hz, 1H), 7.58 (t, *J* = 7.6 Hz, 1H), 7.38 – 7.32 (m, 3H), 7.29 (d, *J* = 8.0 Hz, 1H), 7.00 (d, *J* = 6.4 Hz, 2H), 6.75 (d, *J* = 10.0 Hz, 2H), 6.35 (d, *J* = 10.0 Hz, 2H).

**<sup>13</sup>C NMR (100 MHz, CDCl<sub>3</sub>):** δ 184.2, 179.3, 166.7, 147.1, 137.5, 135.9, 134.0, 130.6, 129.8, 129.4, 129.2, 128.7, 128.5 (q, *J* = 308.9 Hz), 128.1, 127.8, 127.2, 52.6.

**<sup>19</sup>F NMR (565 MHz, CDCl<sub>3</sub>):** δ -39.45 (s, 3F).

**HRMS (ESI, *m/z*):** Calculated for C<sub>22</sub>H<sub>14</sub>F<sub>3</sub>O<sub>2</sub>S (M+H)<sup>+</sup> 399.0667, Measured 399.0667.

# Copies of the $^1\text{H}$ NMR, $^{13}\text{C}$ NMR, $^{19}\text{F}$ NMR

## 1- $^1\text{H}$ NMR

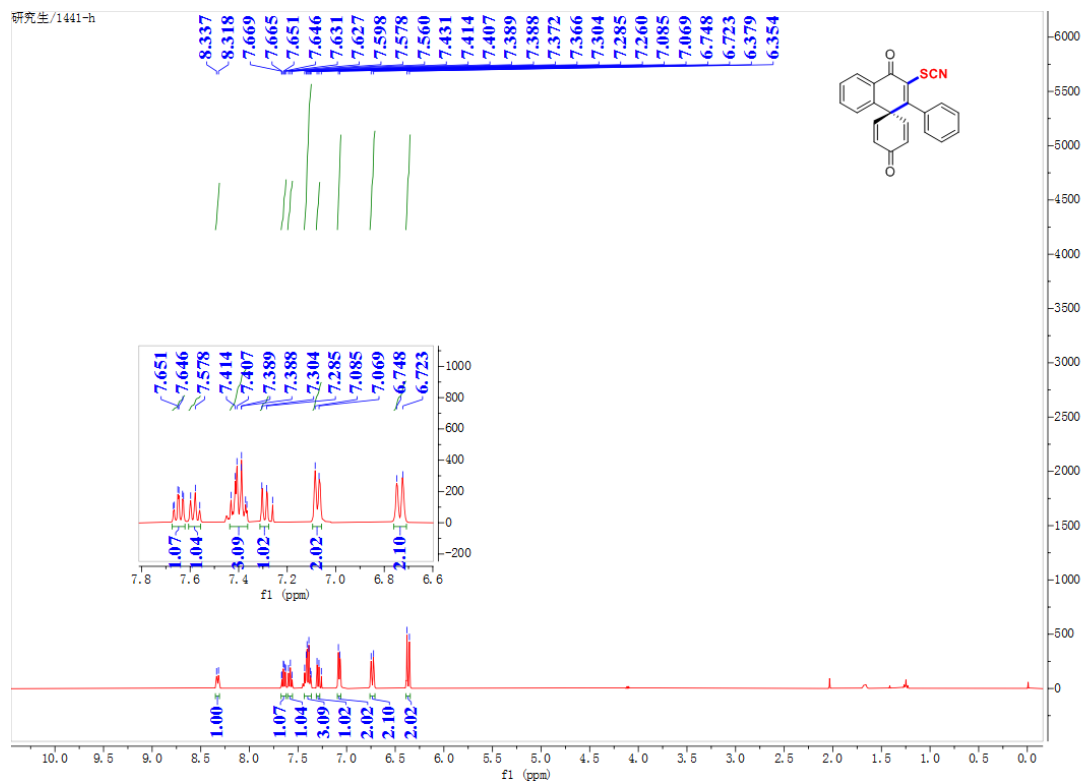

## 1- $^{13}\text{C}$ NMR

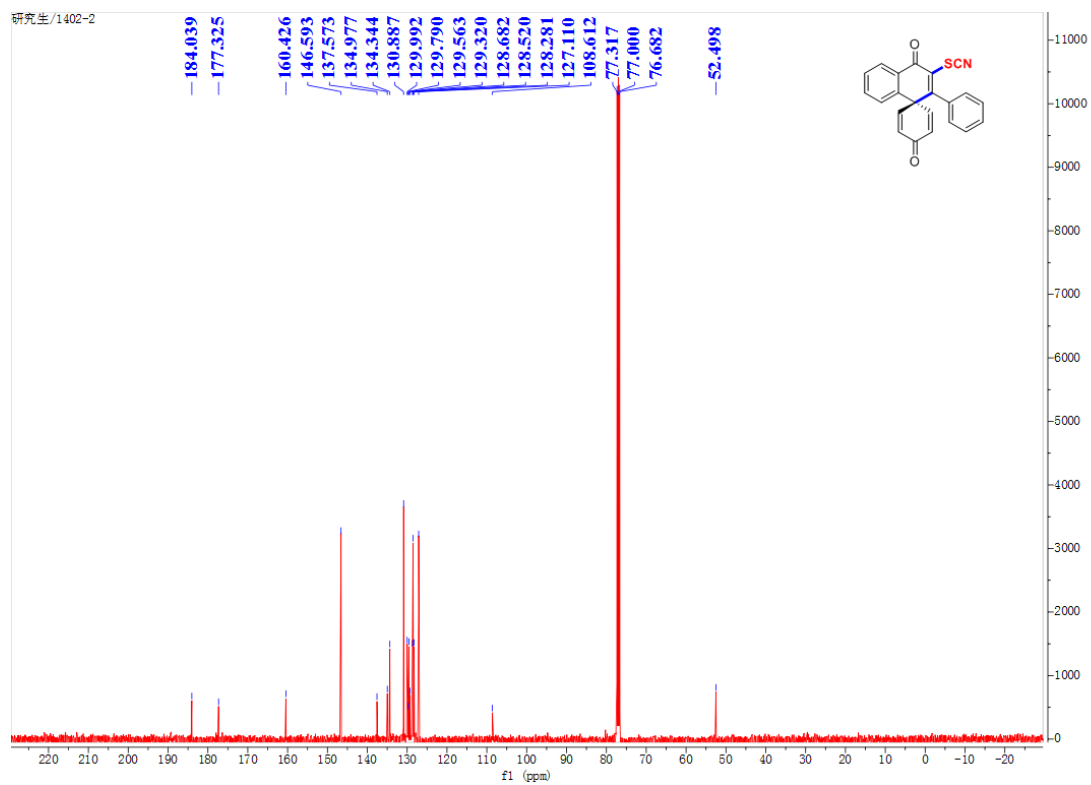

## $^2\text{-}^1\text{H}$ NMR

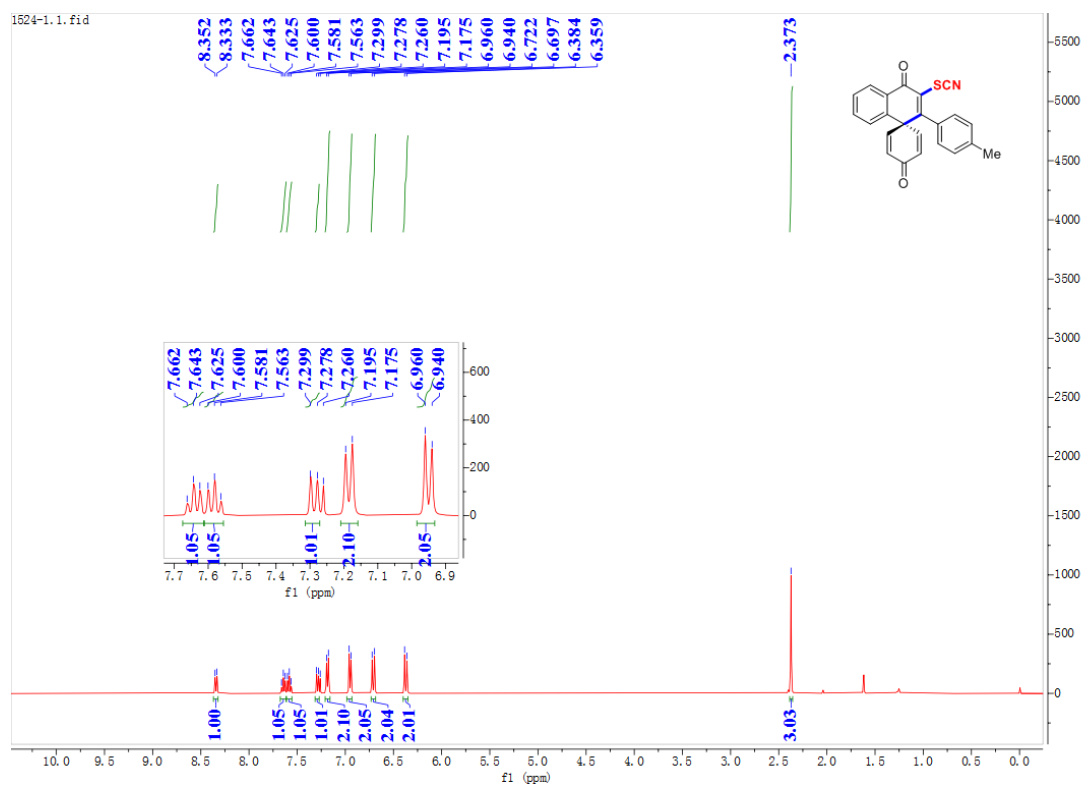

## $^2\text{-}^{13}\text{C}$ NMR

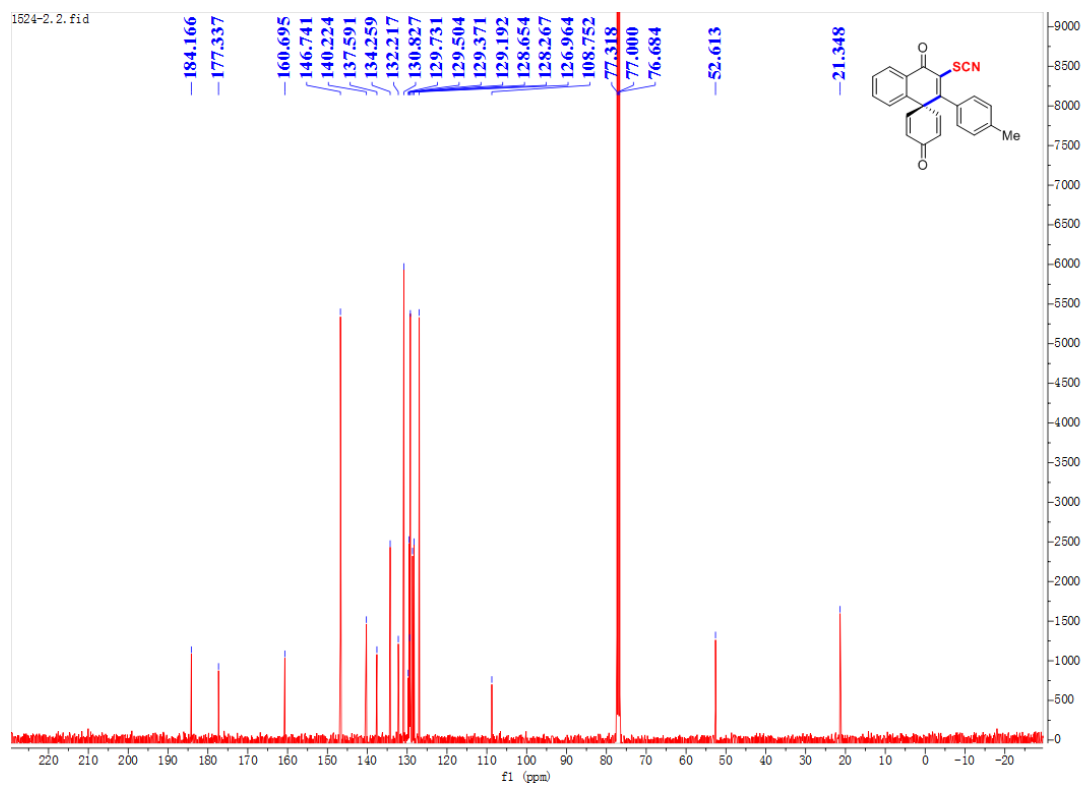

### 3-<sup>1</sup>H NMR

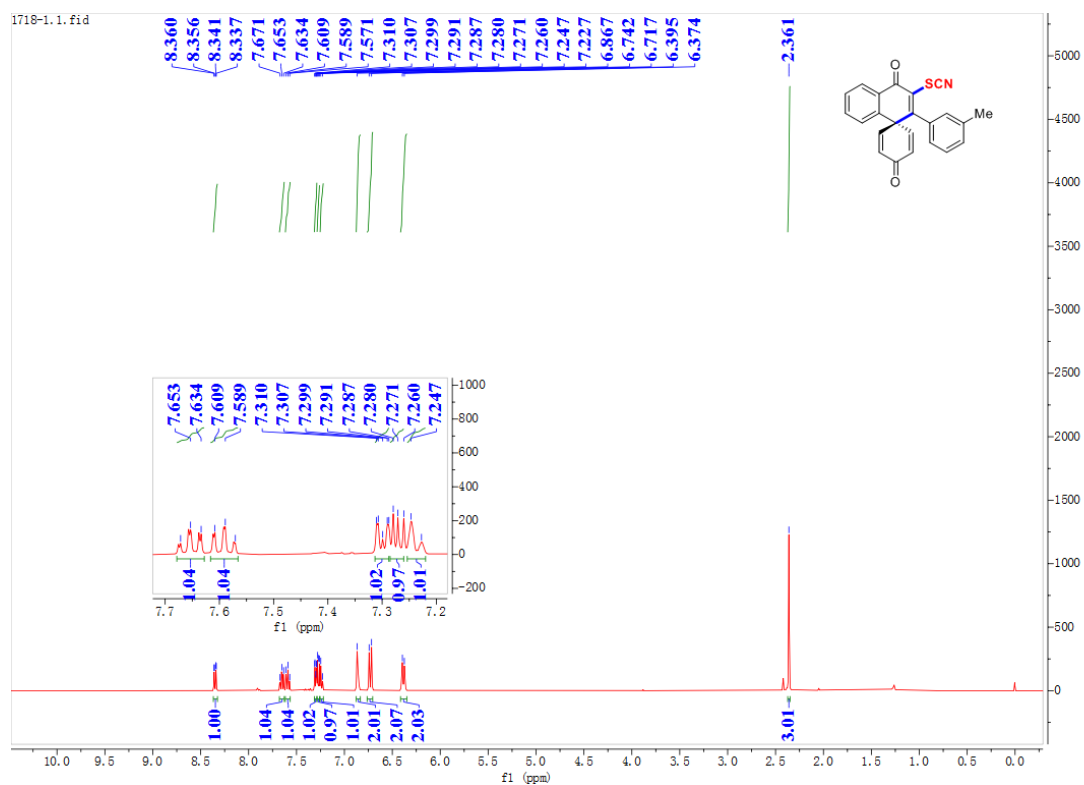

### 3-<sup>13</sup>C NMR

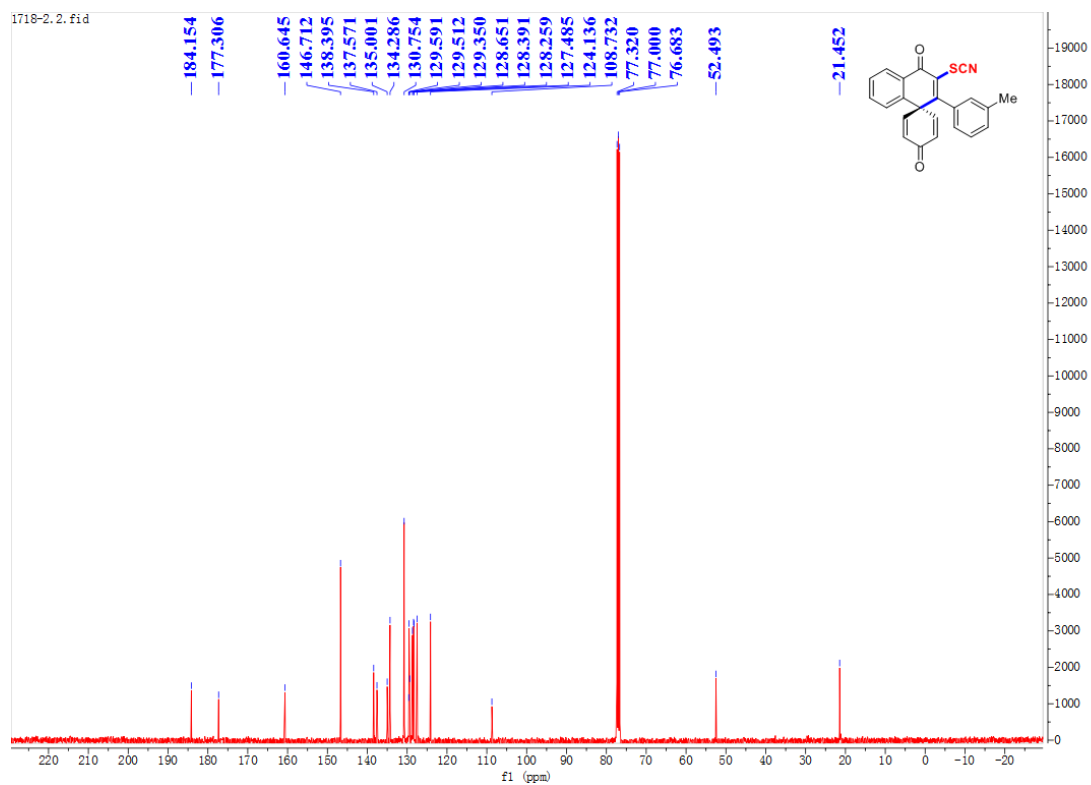

## 4-<sup>1</sup>H NMR

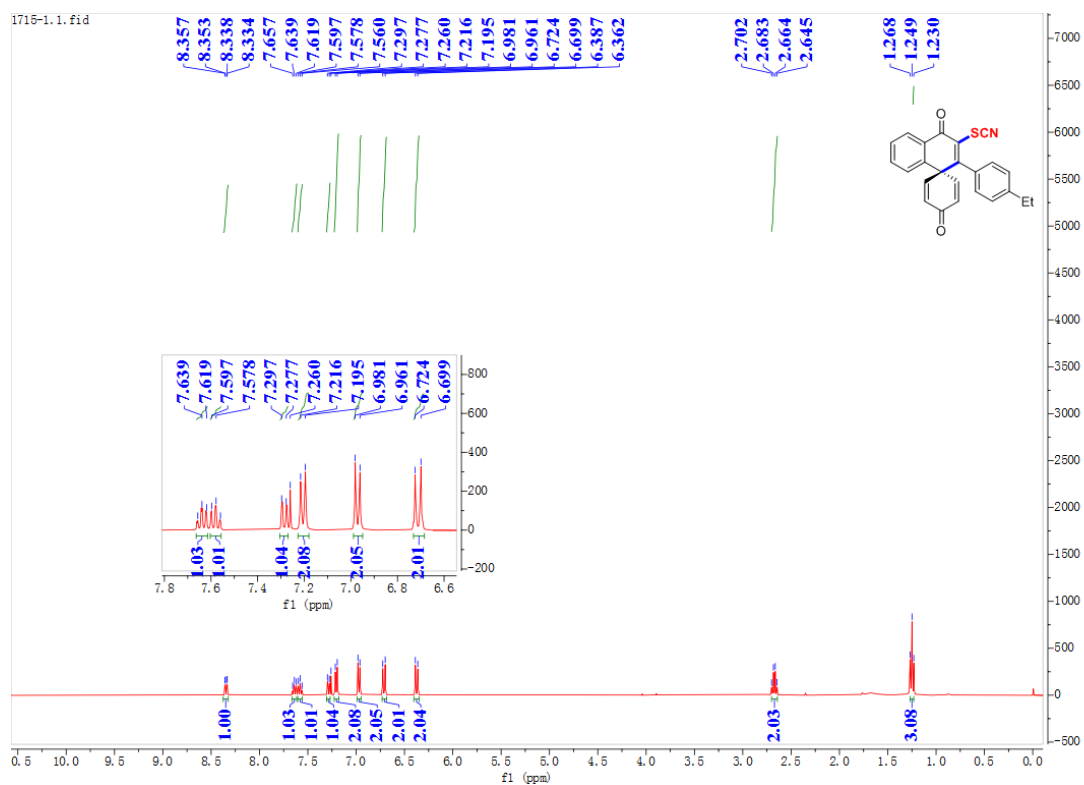

## 4-<sup>13</sup>C NMR

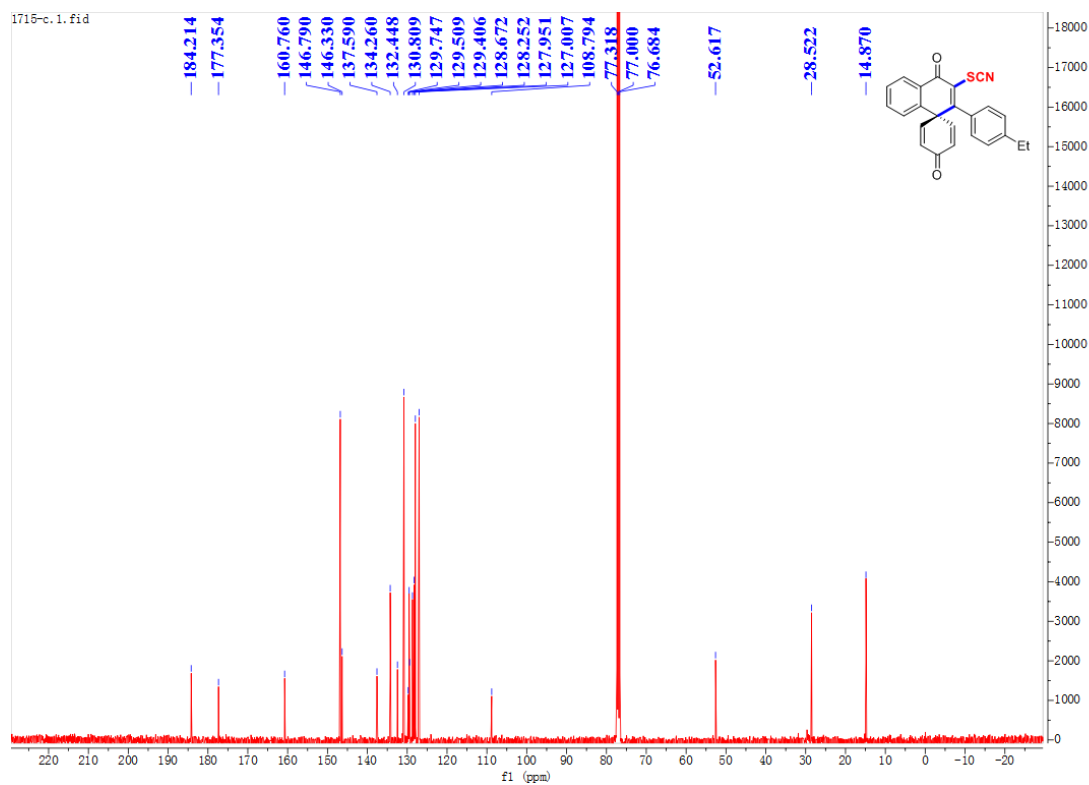



## 5-<sup>1</sup>H NMR

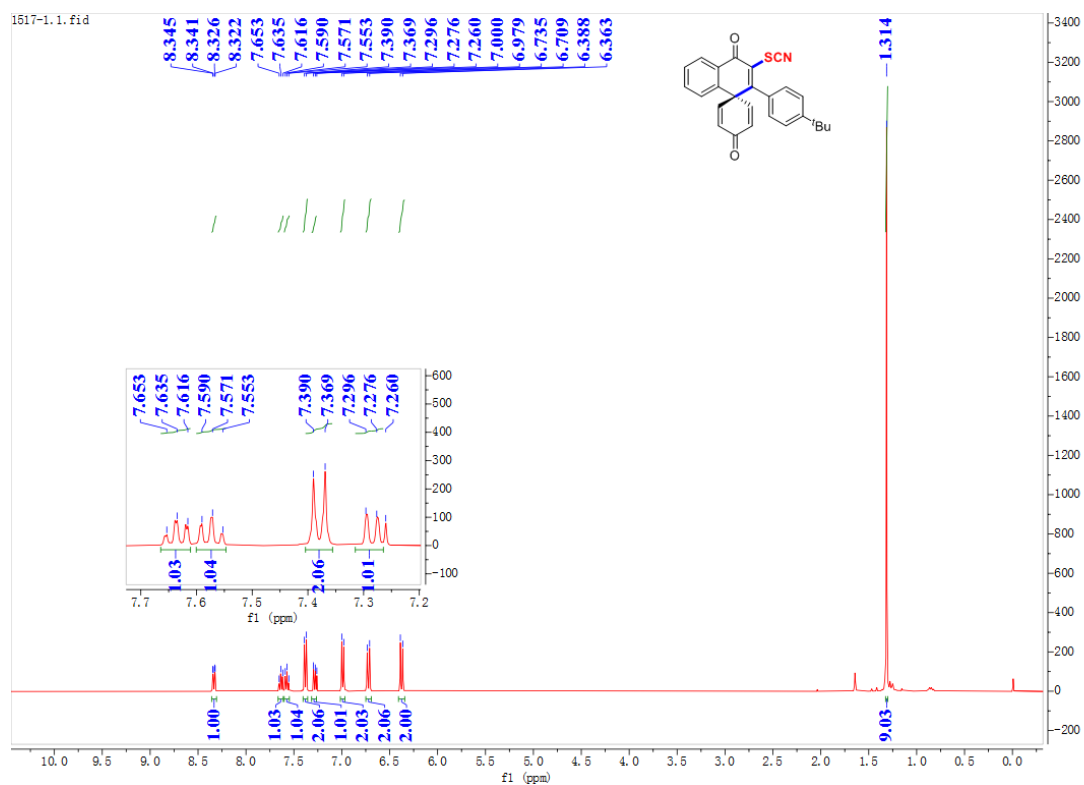

## 5-<sup>13</sup>C NMR

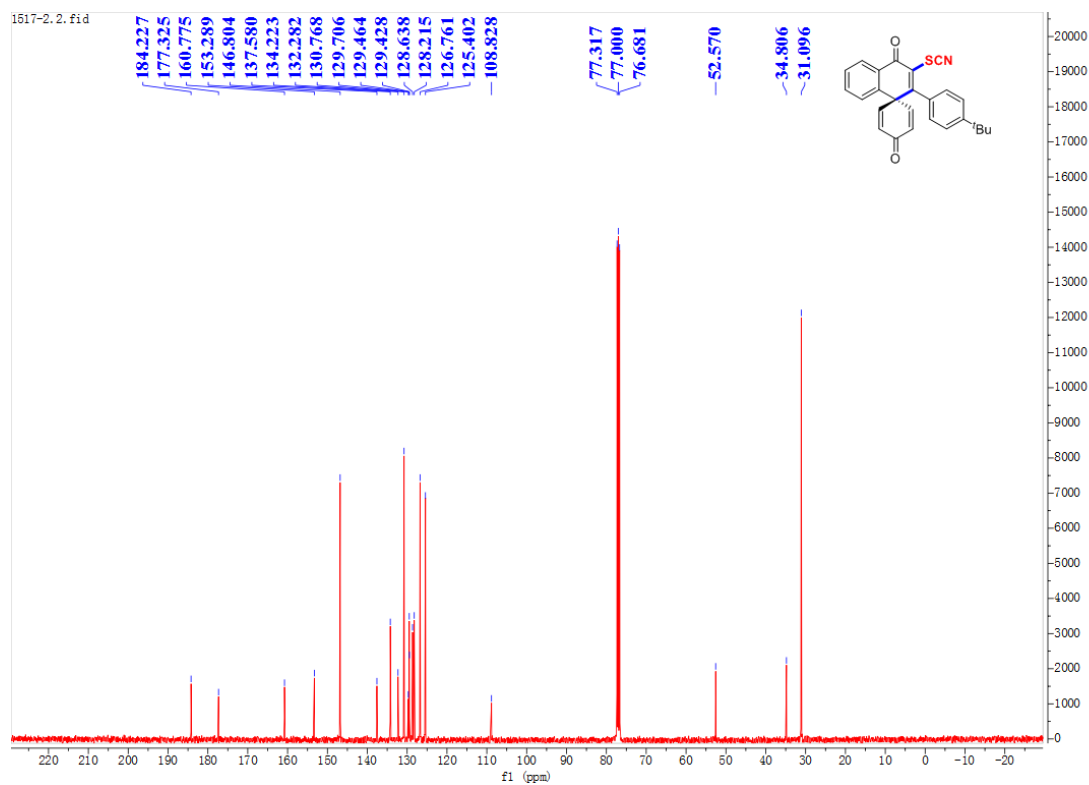

## 6-<sup>1</sup>H NMR

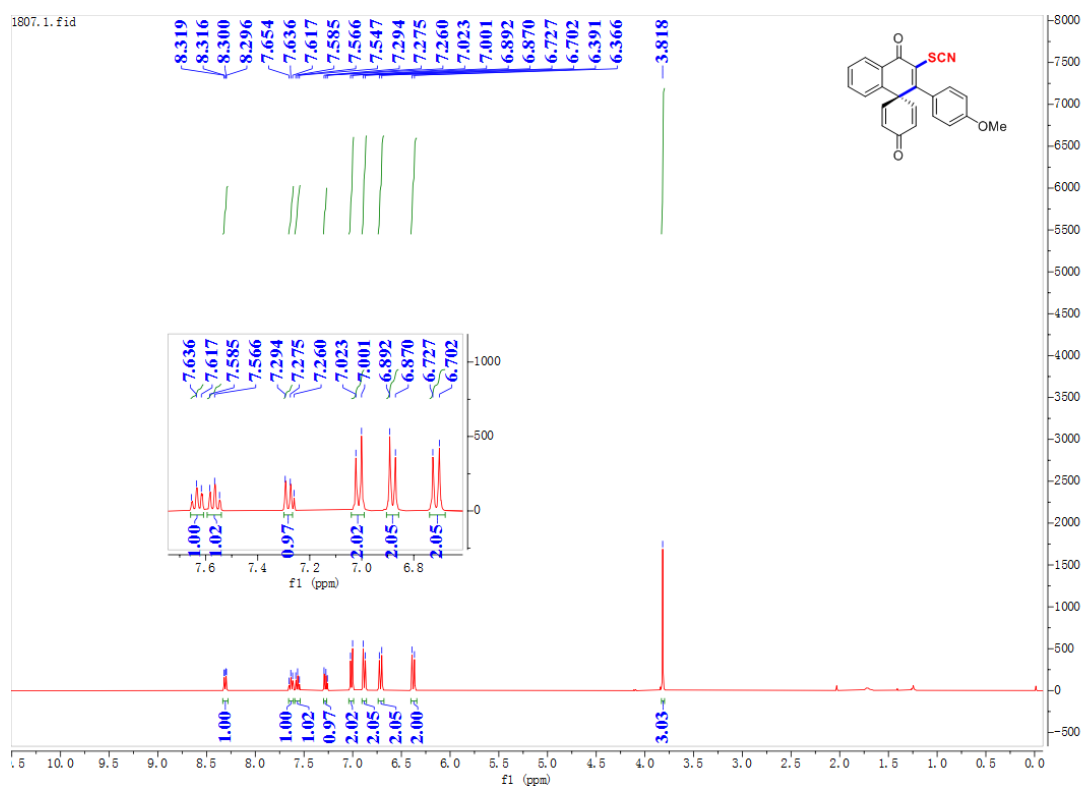

## 6-<sup>13</sup>C NMR

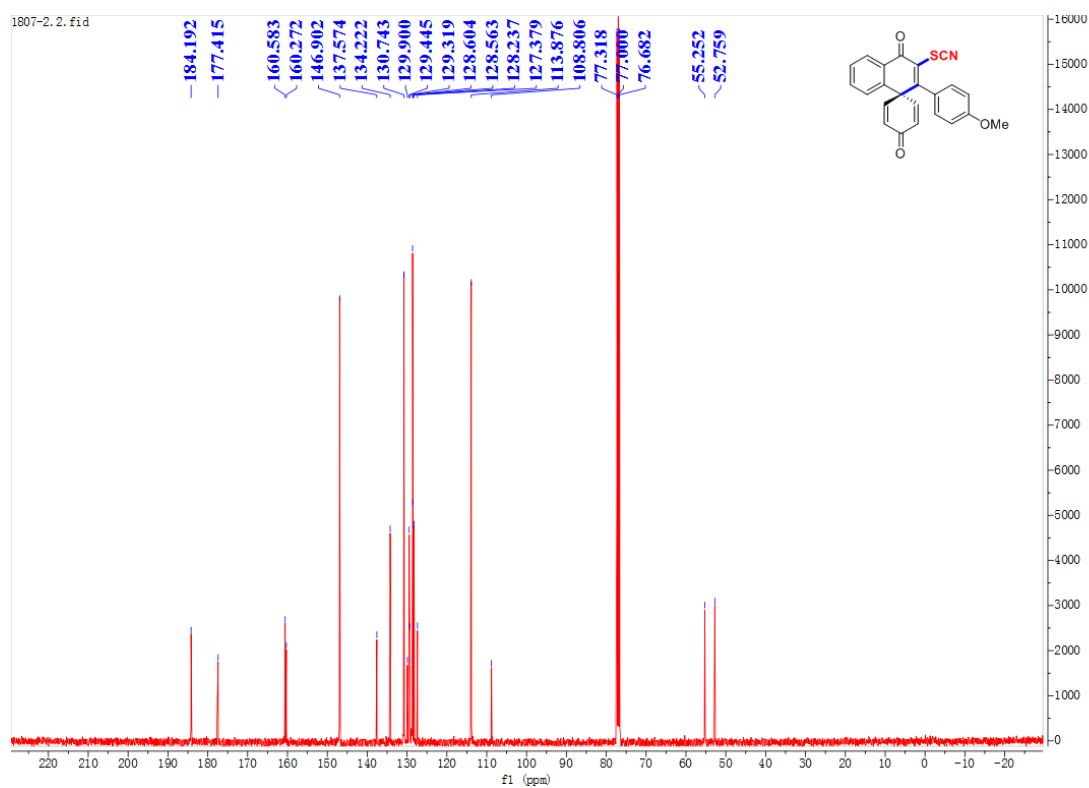

# 7-<sup>1</sup>H NMR

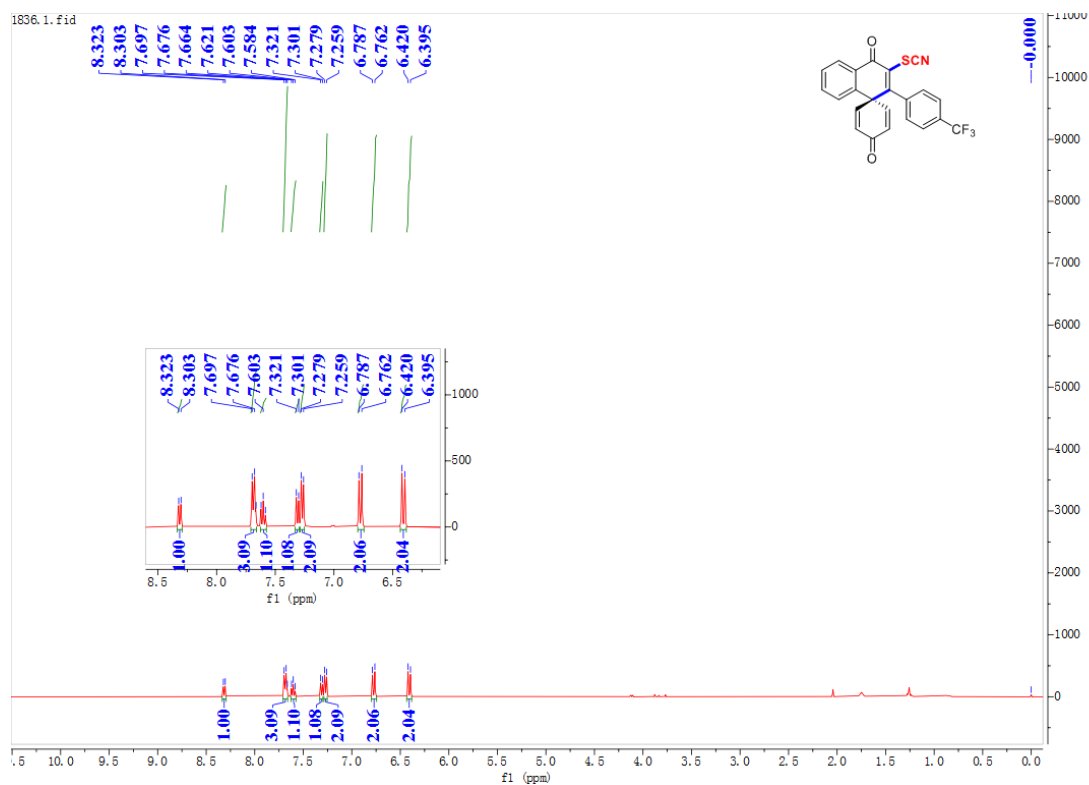

# 7-<sup>13</sup>C NMR

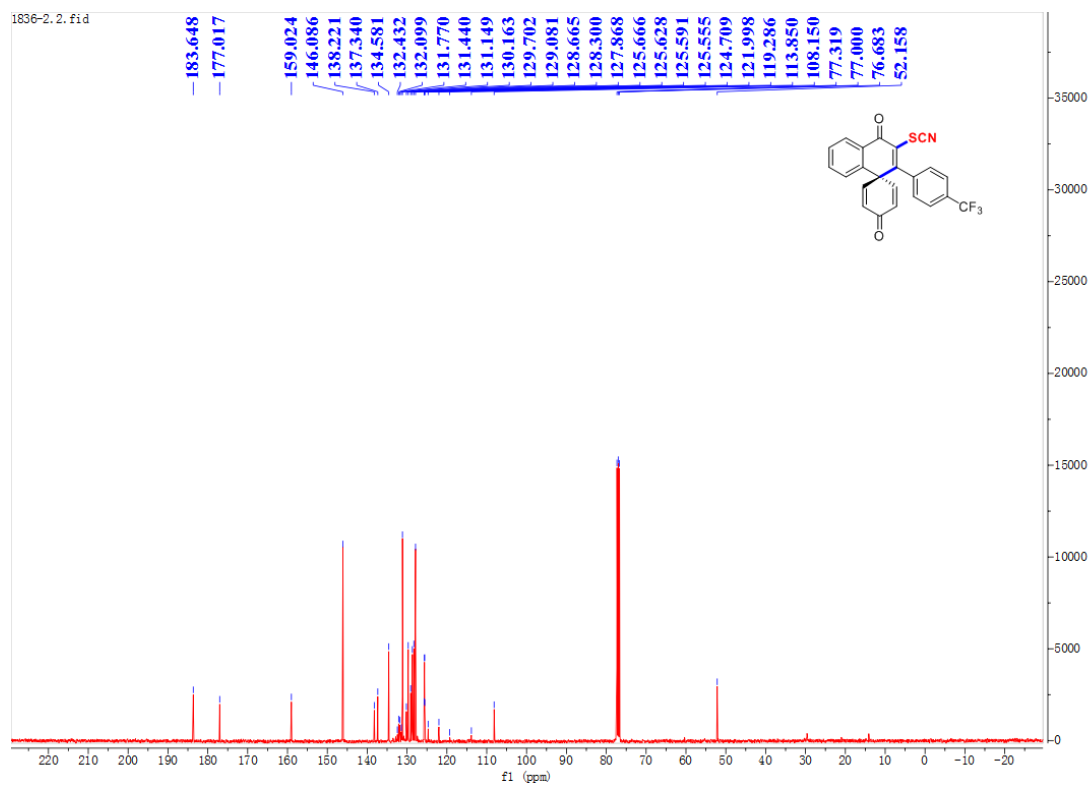

## 7-<sup>19</sup>F NMR

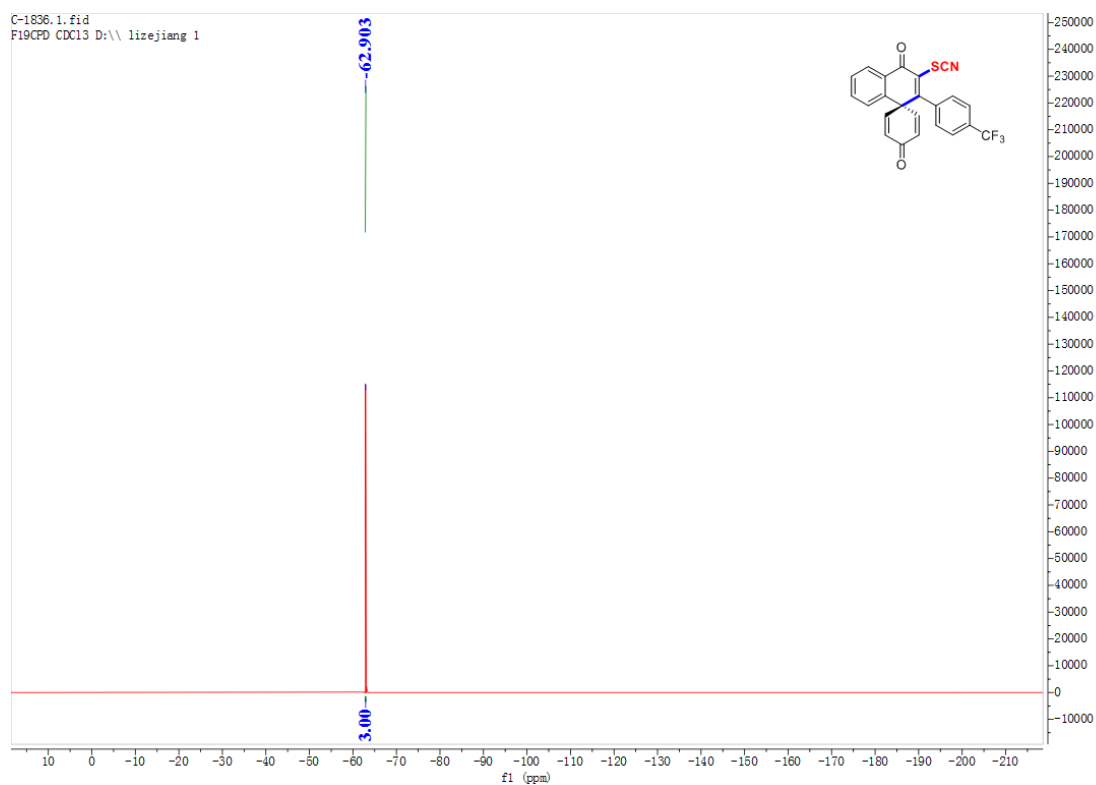

## 8-<sup>1</sup>H NMR

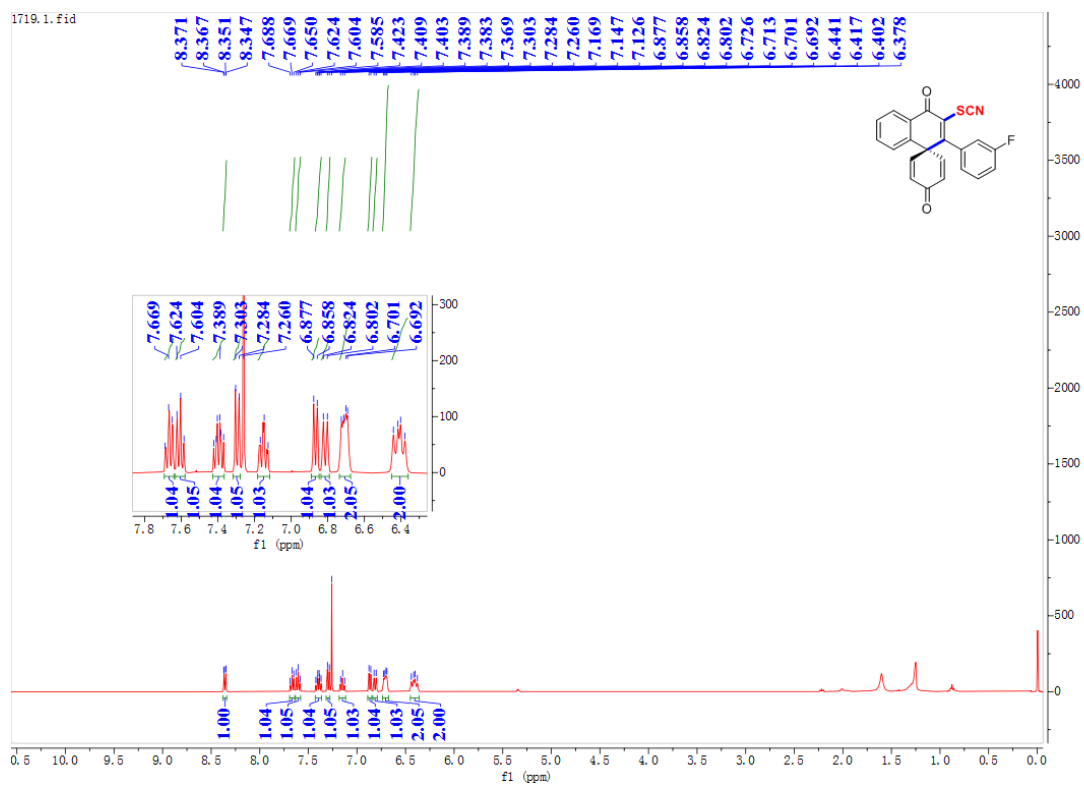

## 8-<sup>13</sup>C NMR

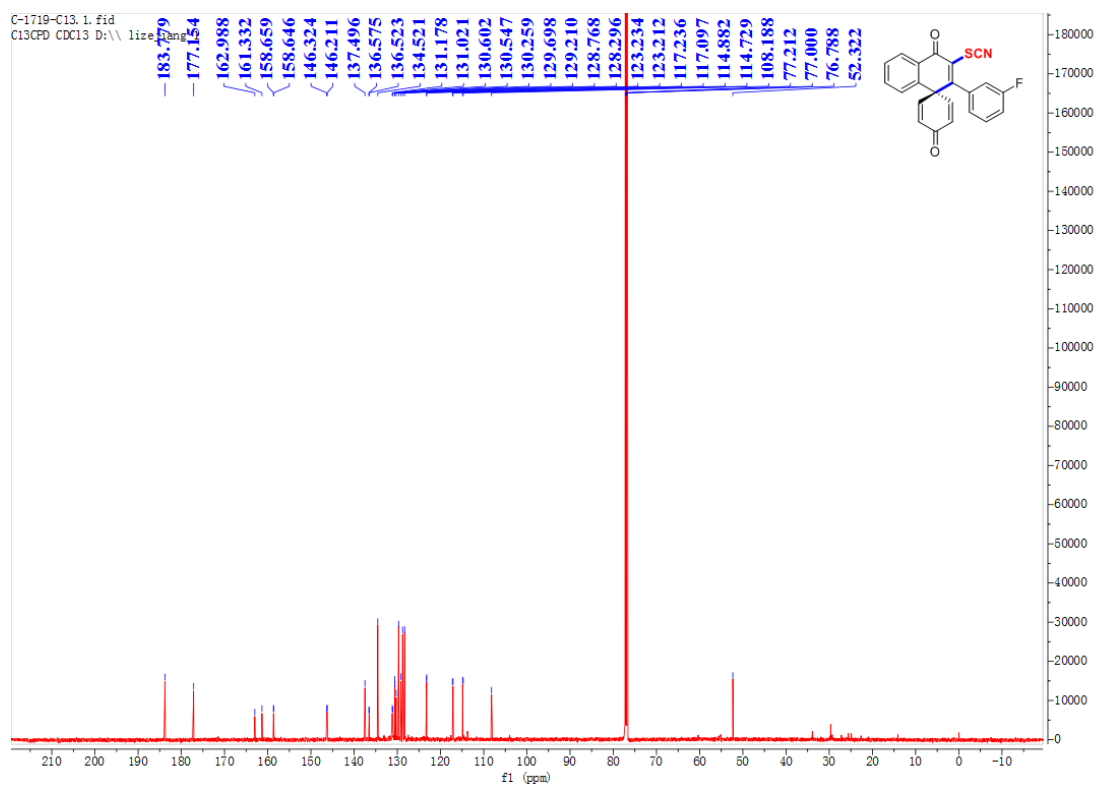

## 8-<sup>19</sup>F NMR

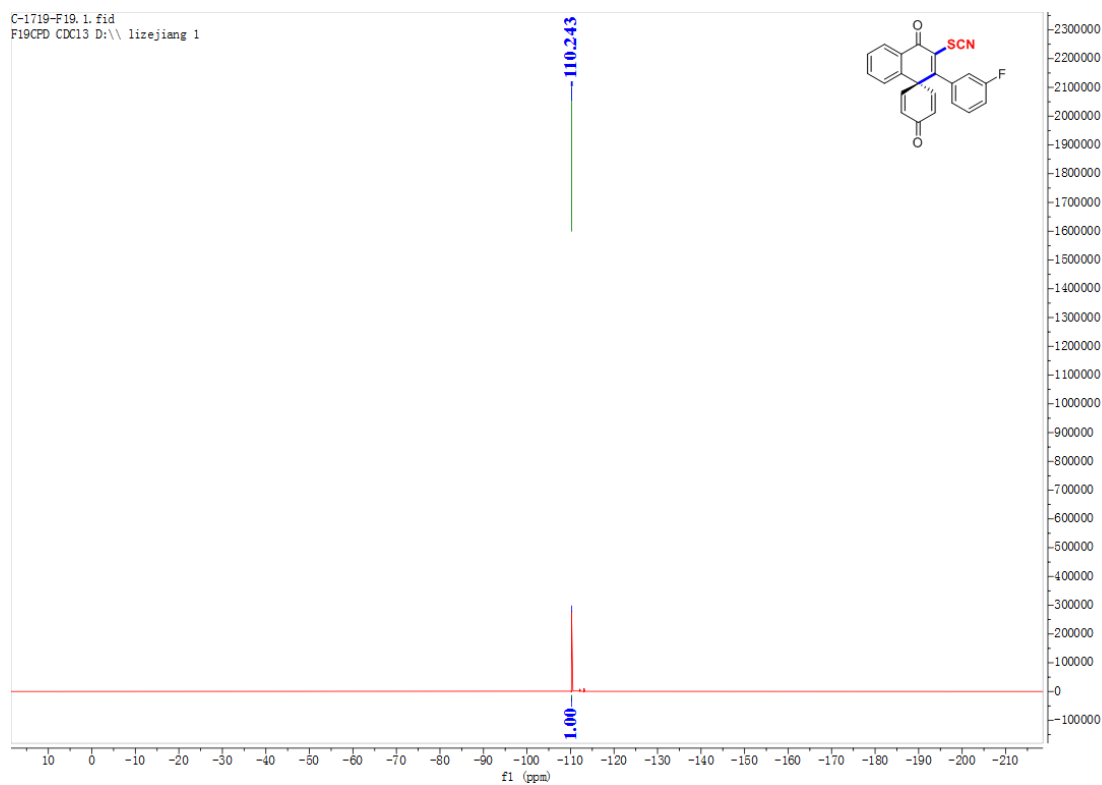

## 9-<sup>1</sup>H NMR

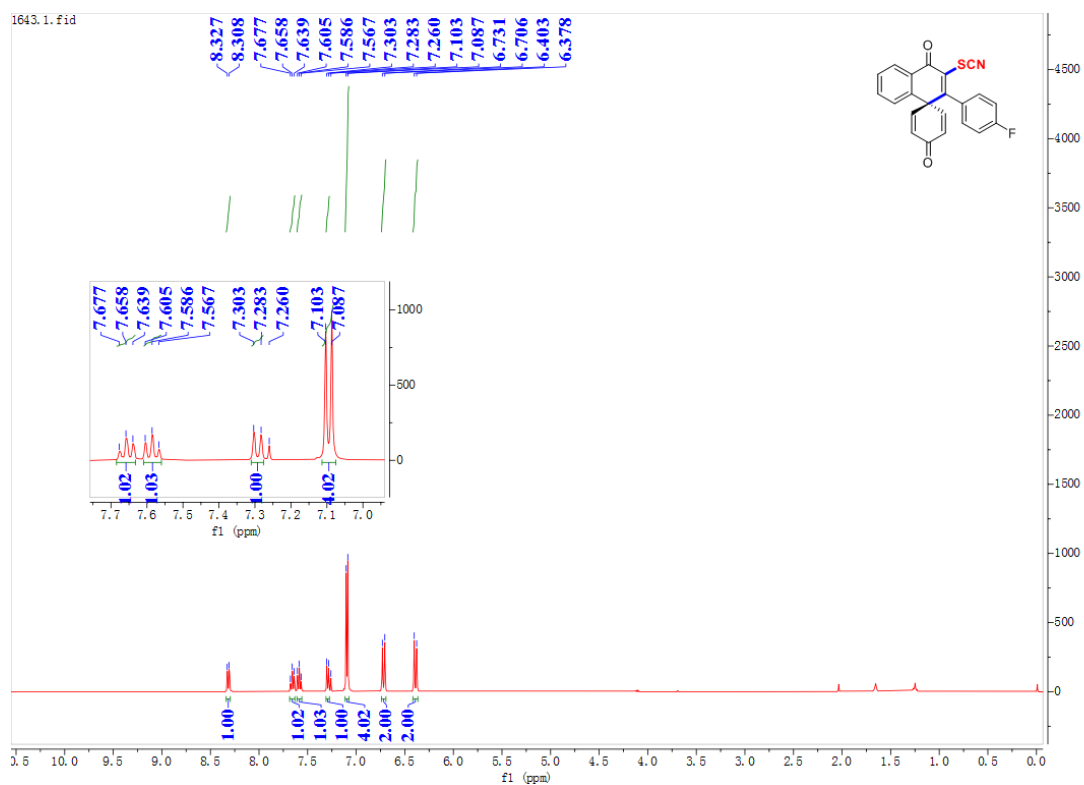

## 9-<sup>13</sup>C NMR

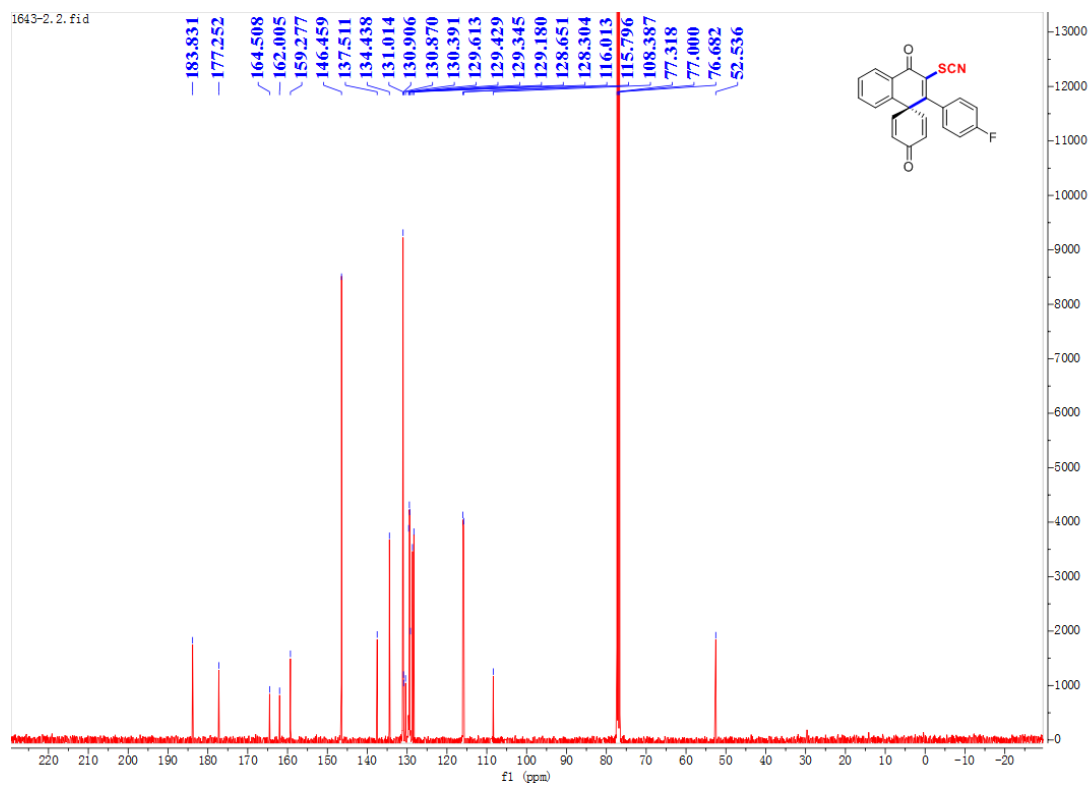

## 9-<sup>19</sup>F NMR

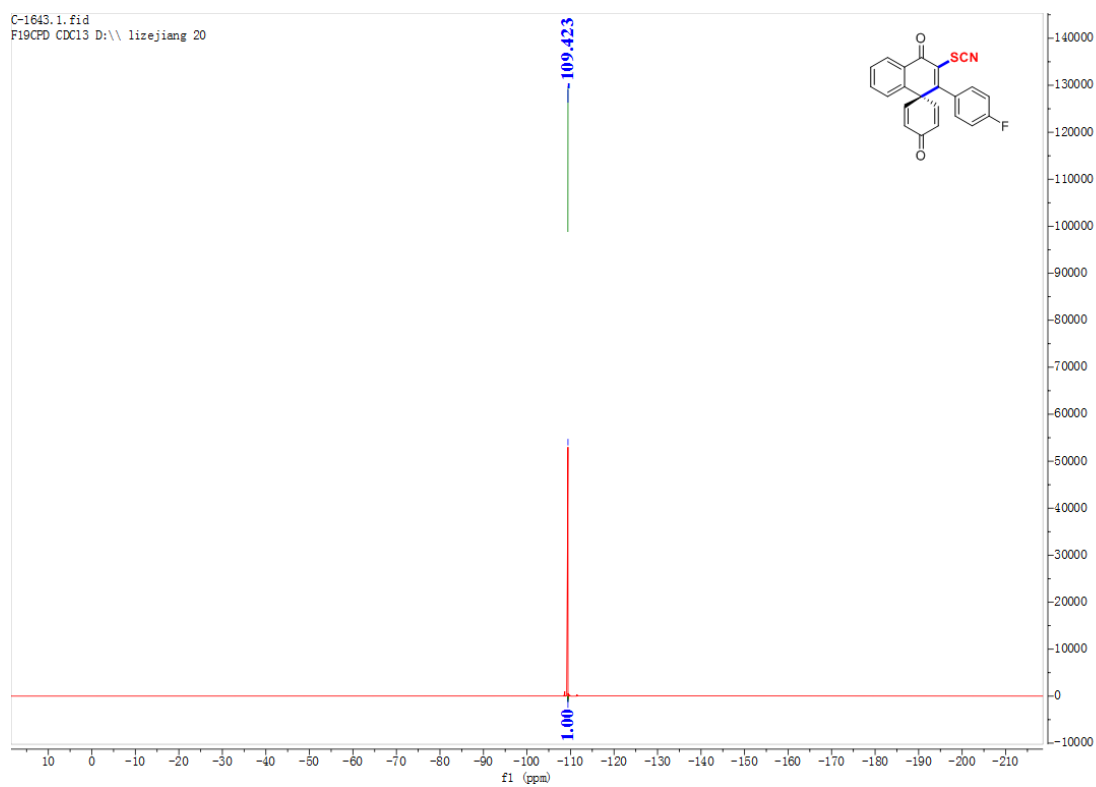

## 10-<sup>1</sup>H NMR

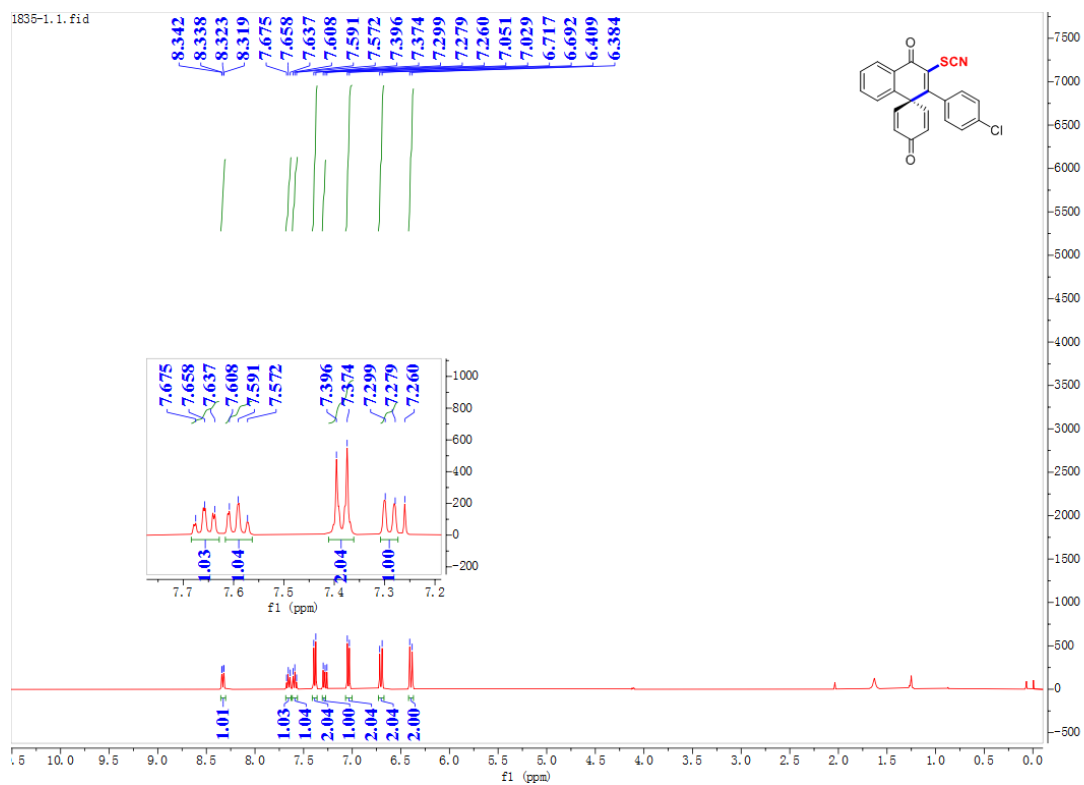

# 10-<sup>13</sup>C NMR

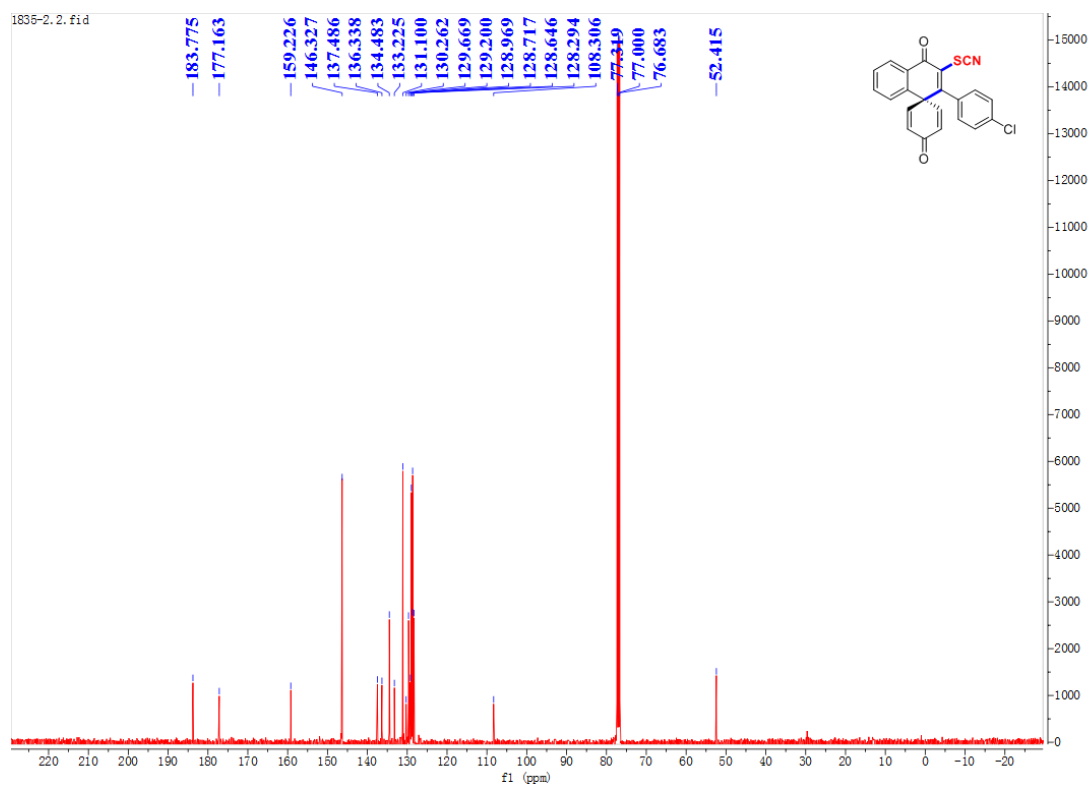

# 11-<sup>1</sup>H NMR

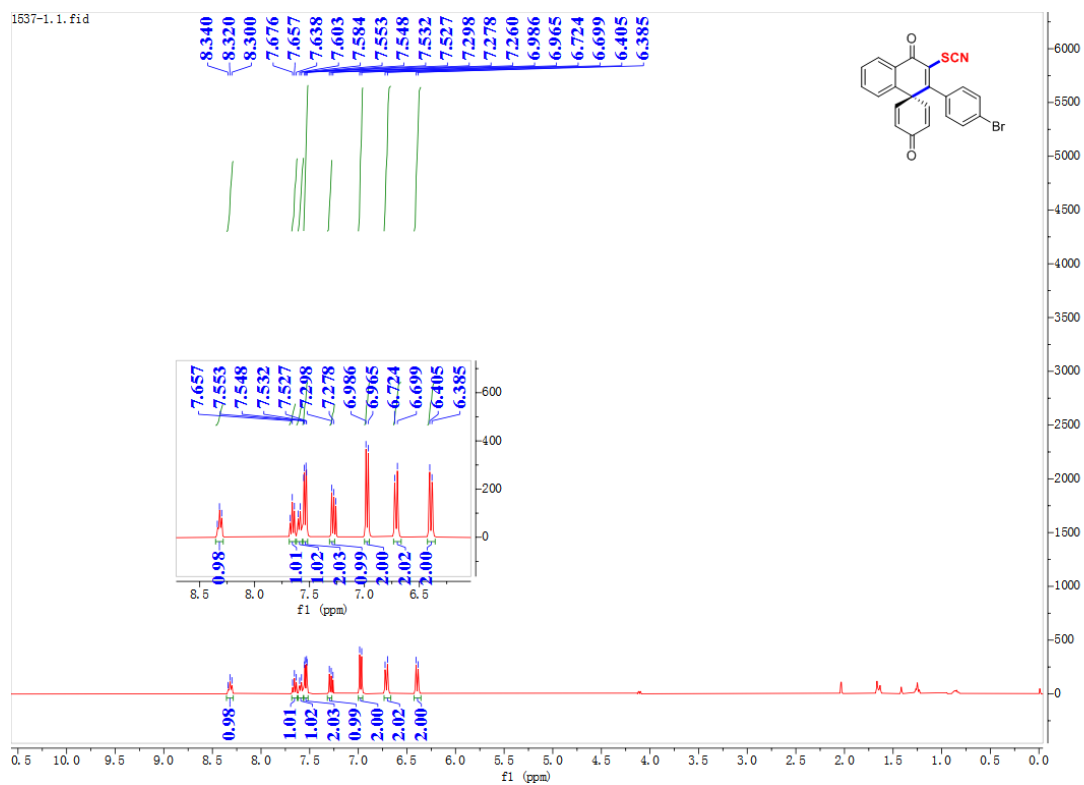



# 11-<sup>13</sup>C NMR

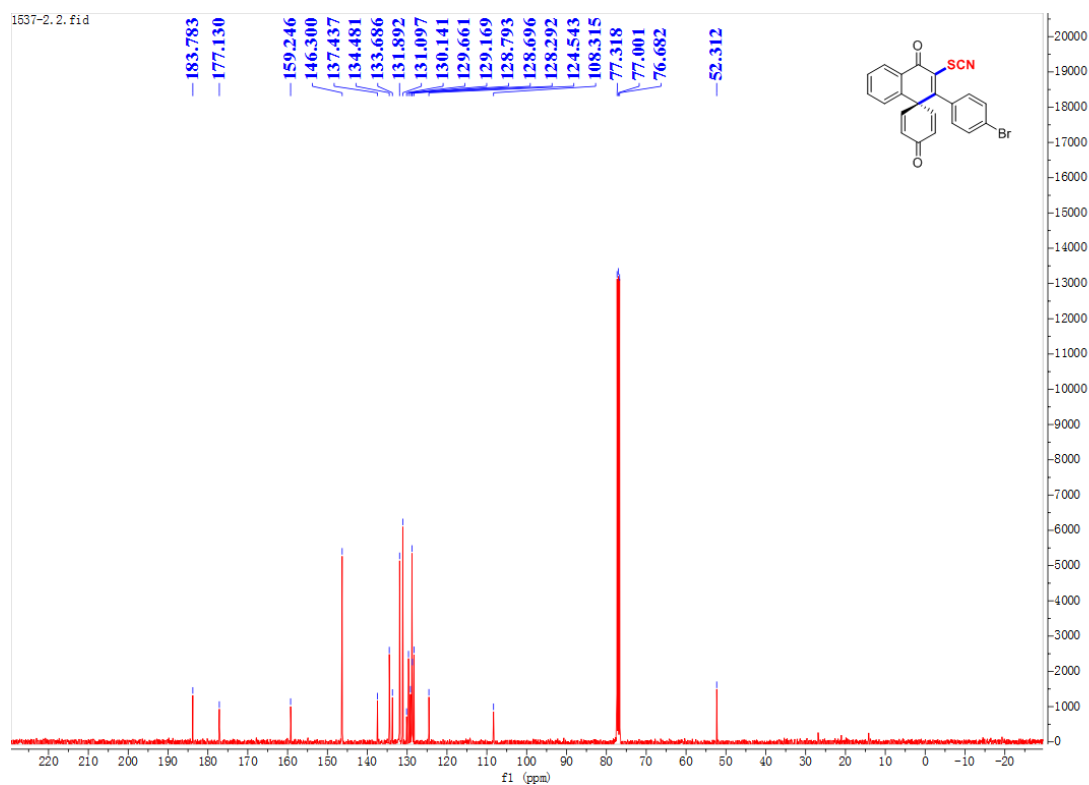

# 12-<sup>1</sup>H NMR

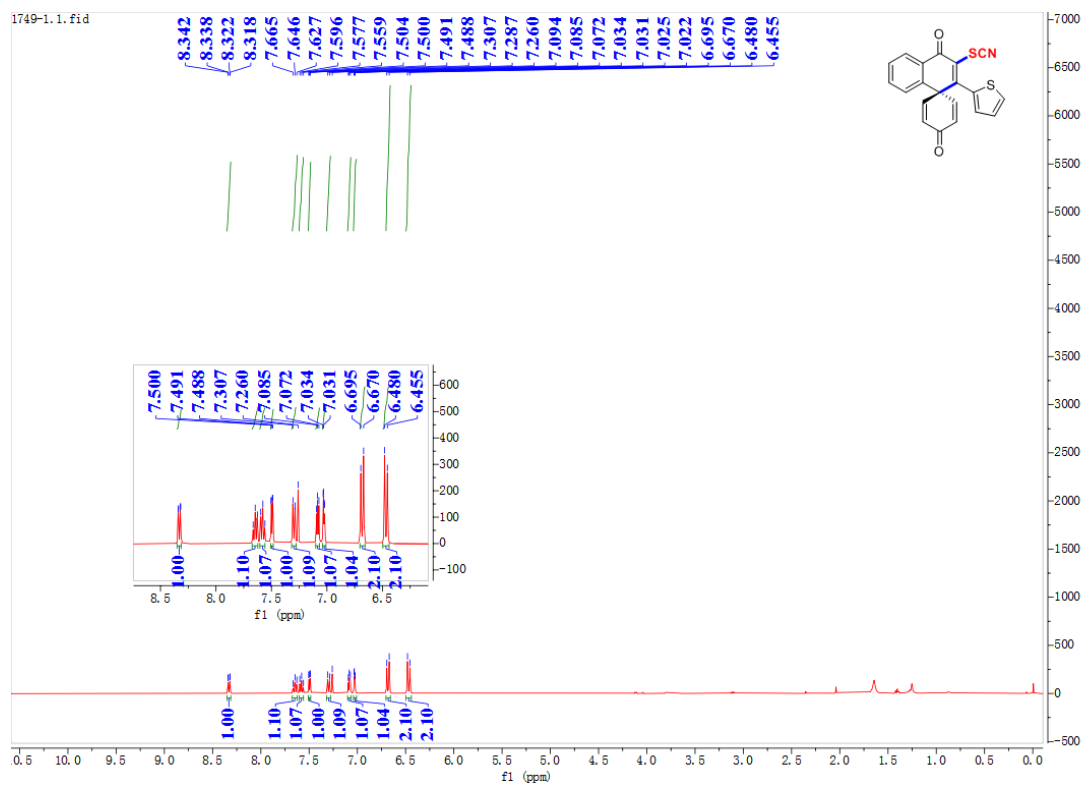

## 12-<sup>13</sup>C NMR

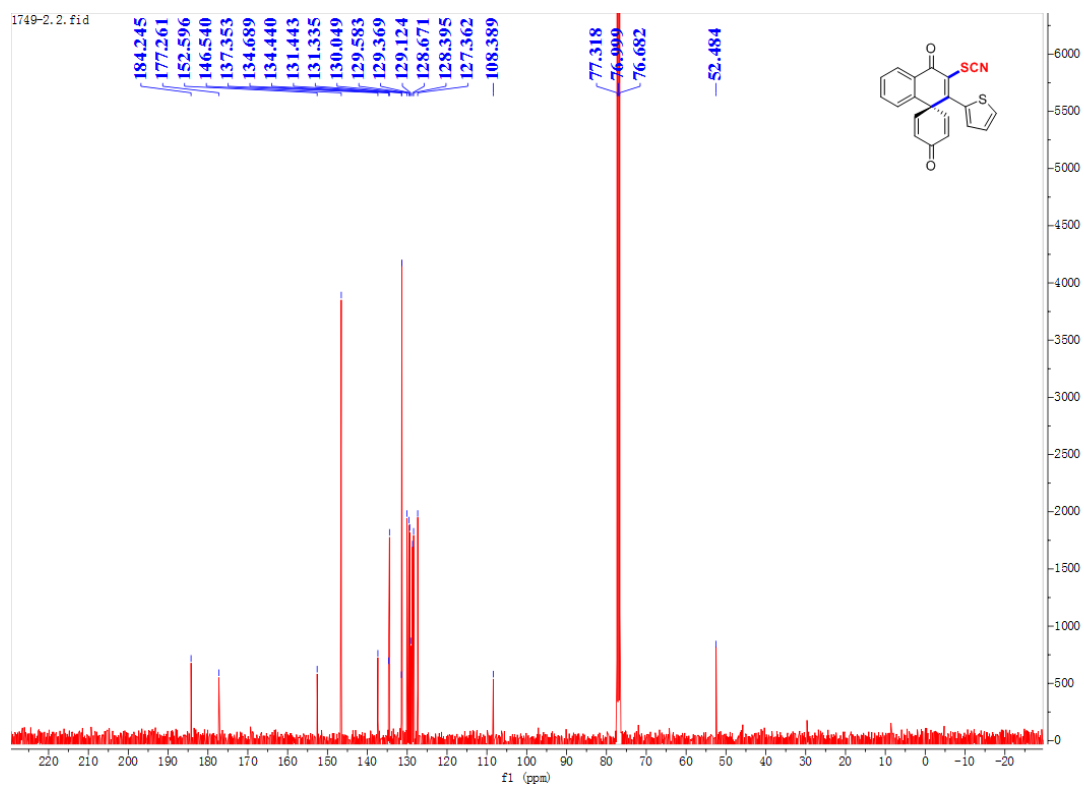

## 13-<sup>1</sup>H NMR

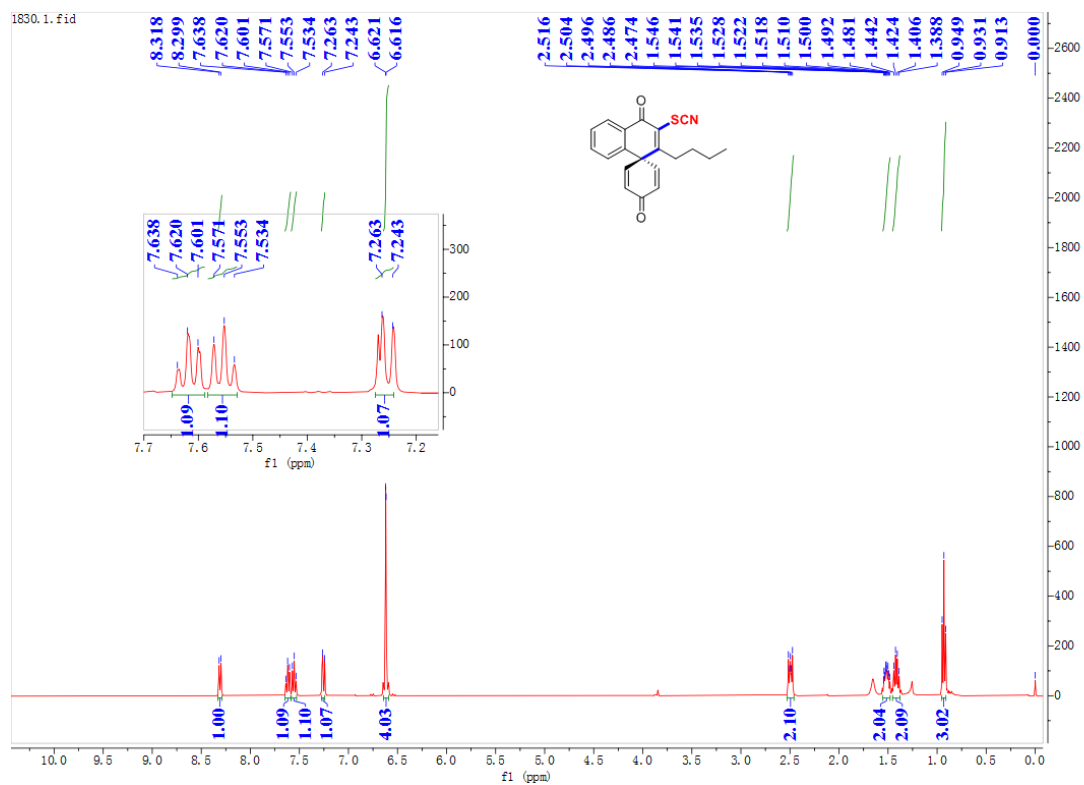

### 13-<sup>13</sup>C NMR

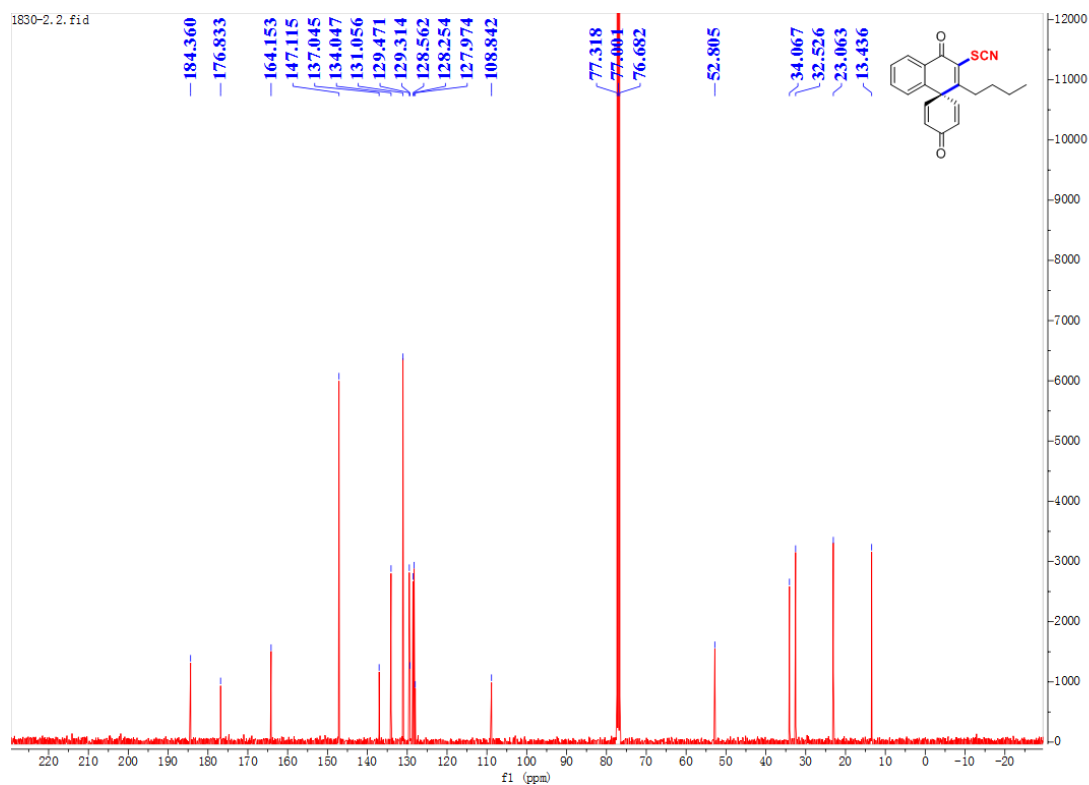

### 14-<sup>1</sup>H NMR

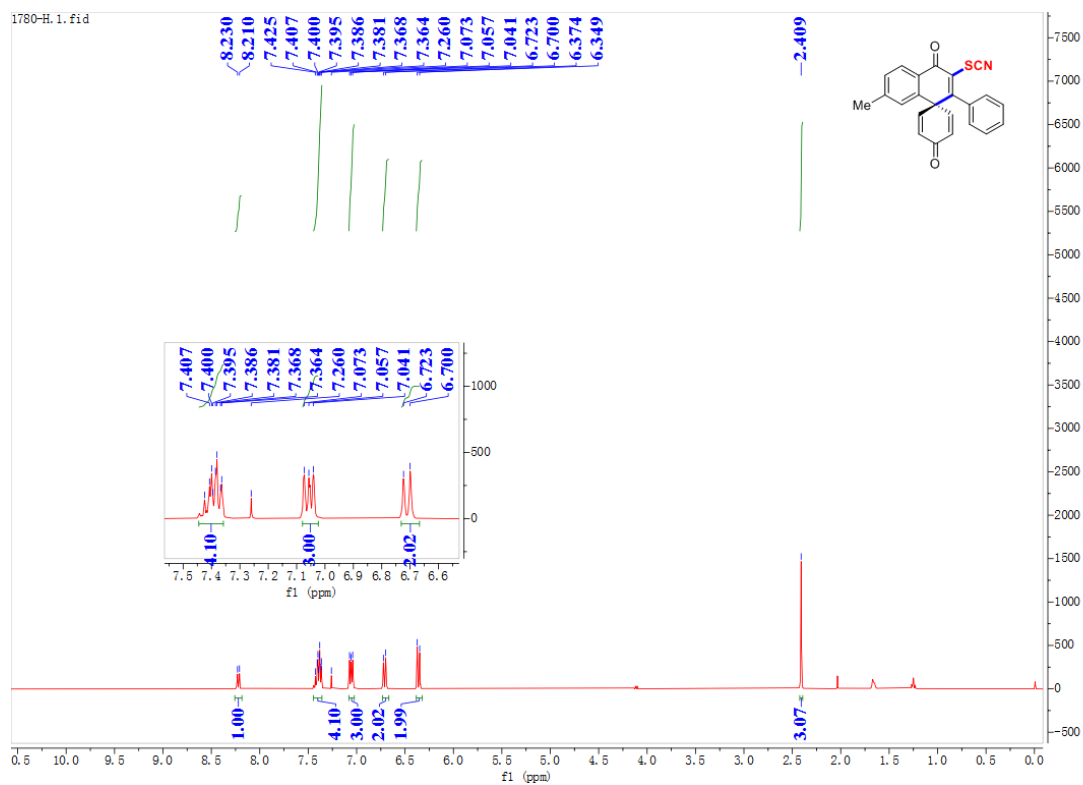

## 14-<sup>13</sup>C NMR

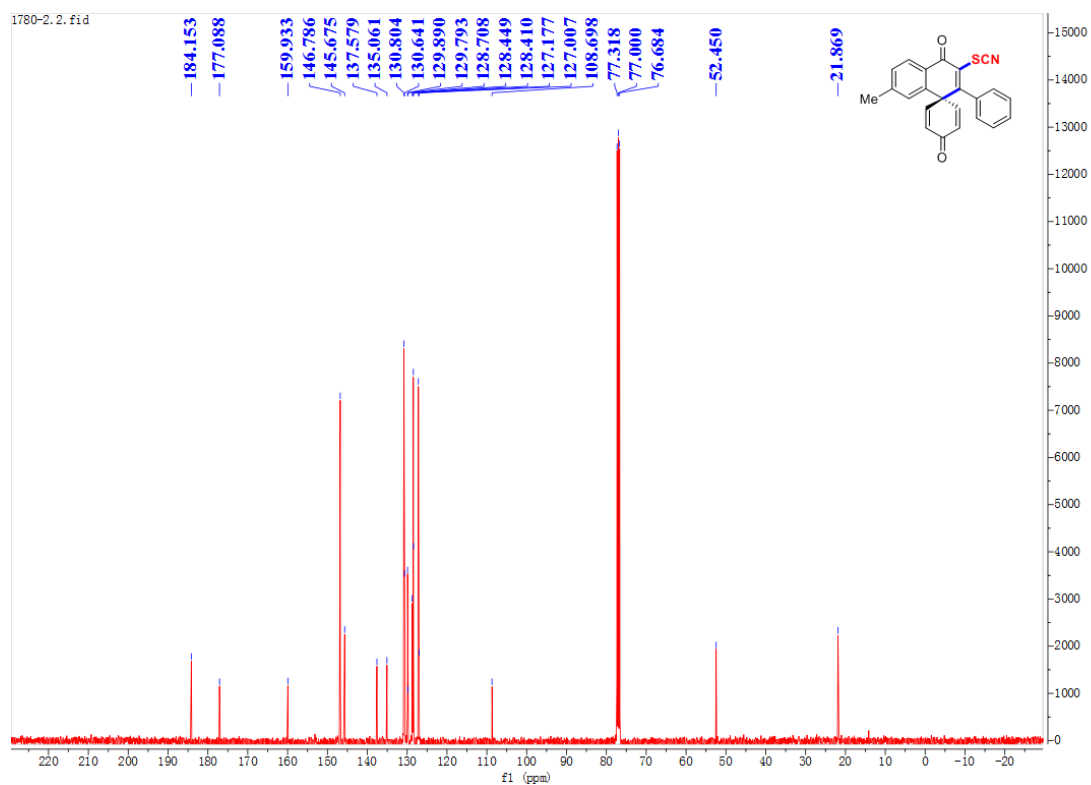

## 15-<sup>1</sup>H NMR

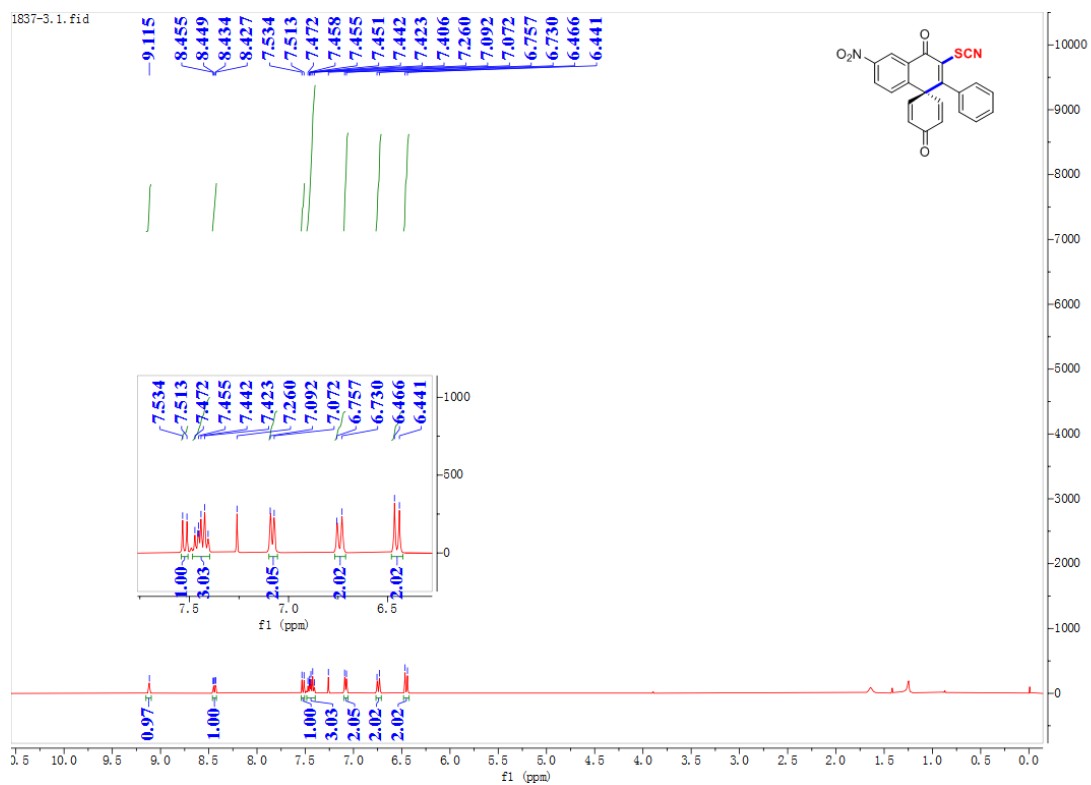

## 15-<sup>13</sup>C NMR

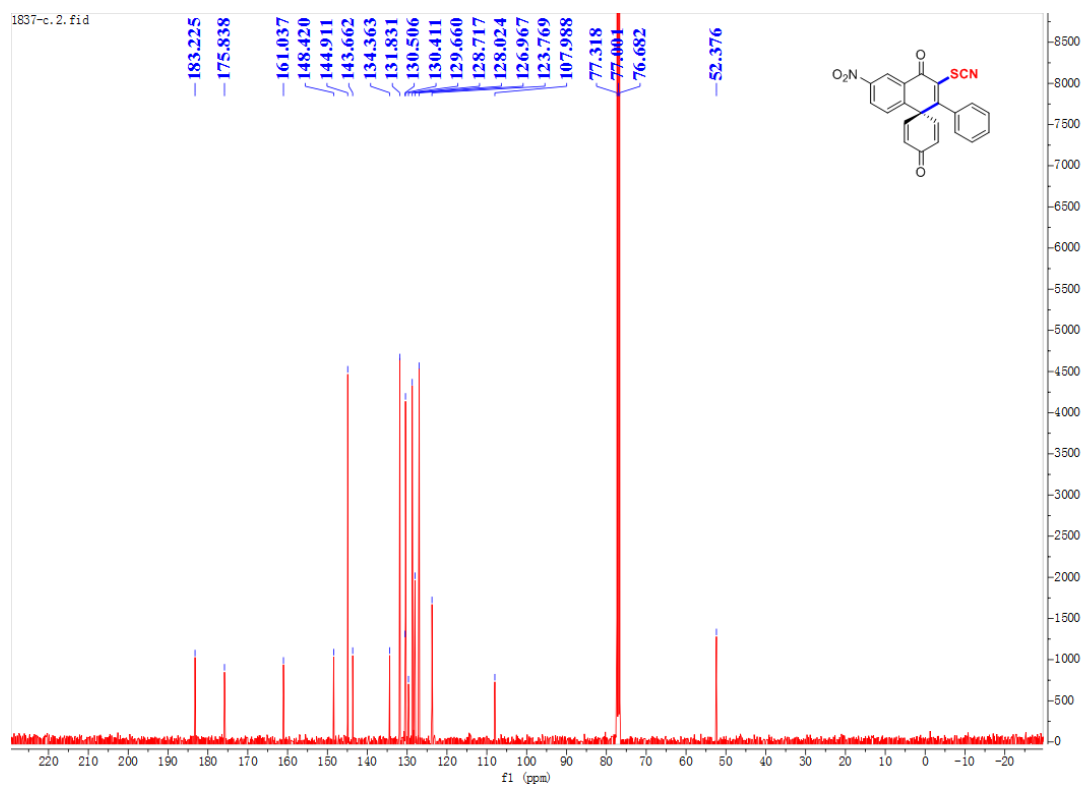

## 16-<sup>1</sup>H NMR

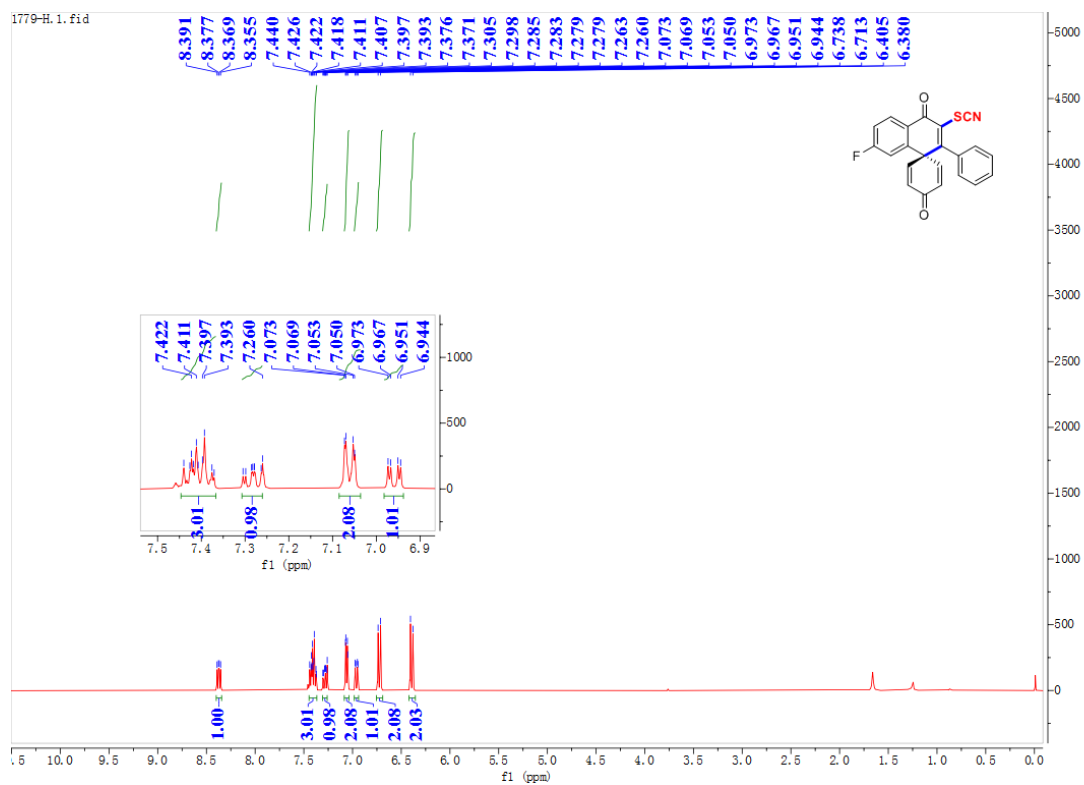

## 16-<sup>13</sup>C NMR

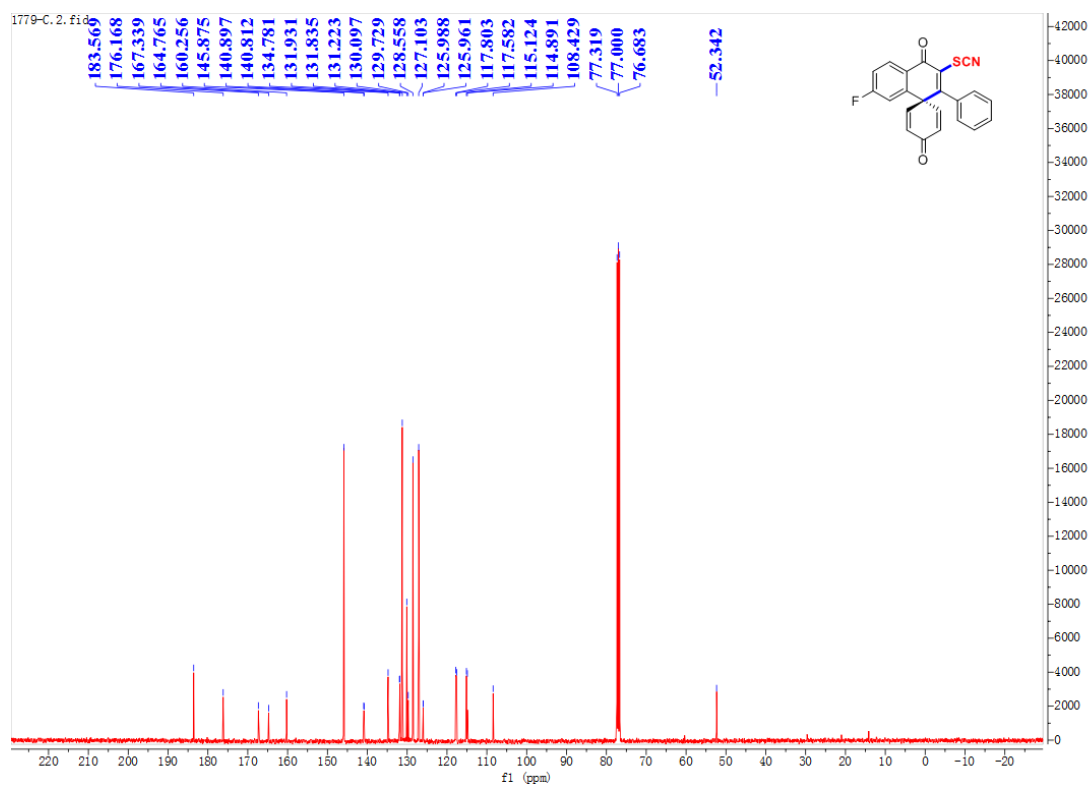

## 16-<sup>19</sup>F NMR

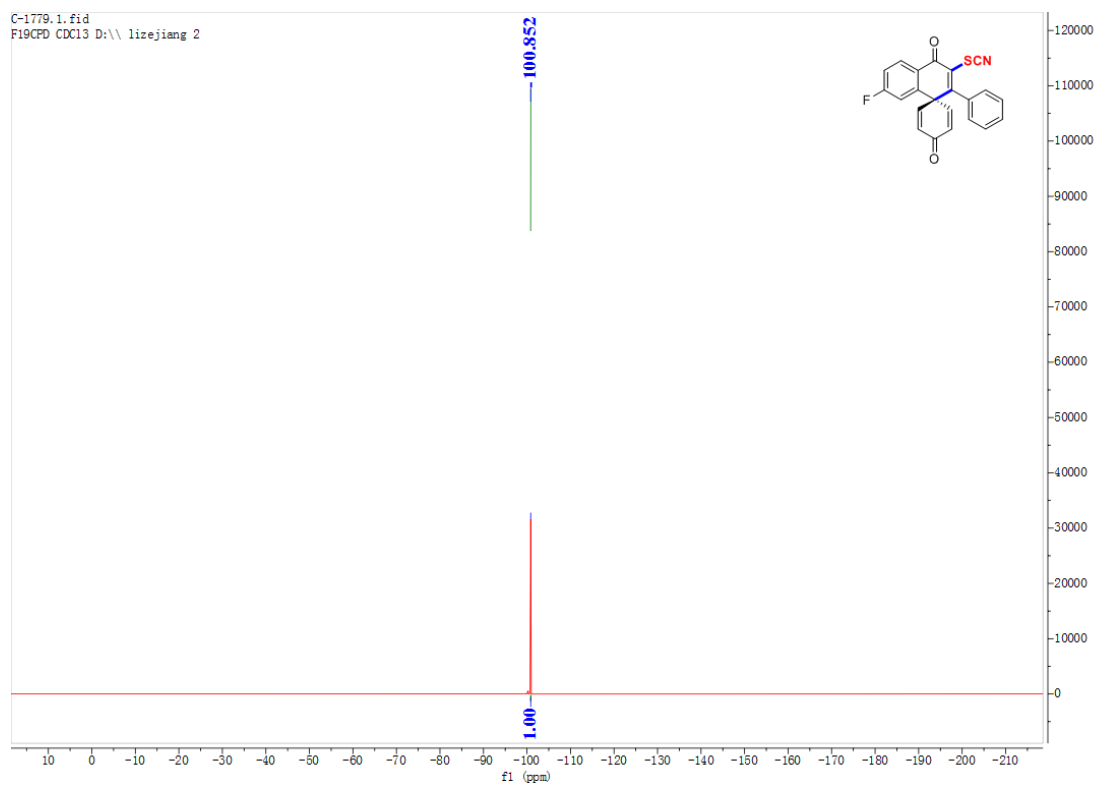

# 17-<sup>1</sup>H NMR

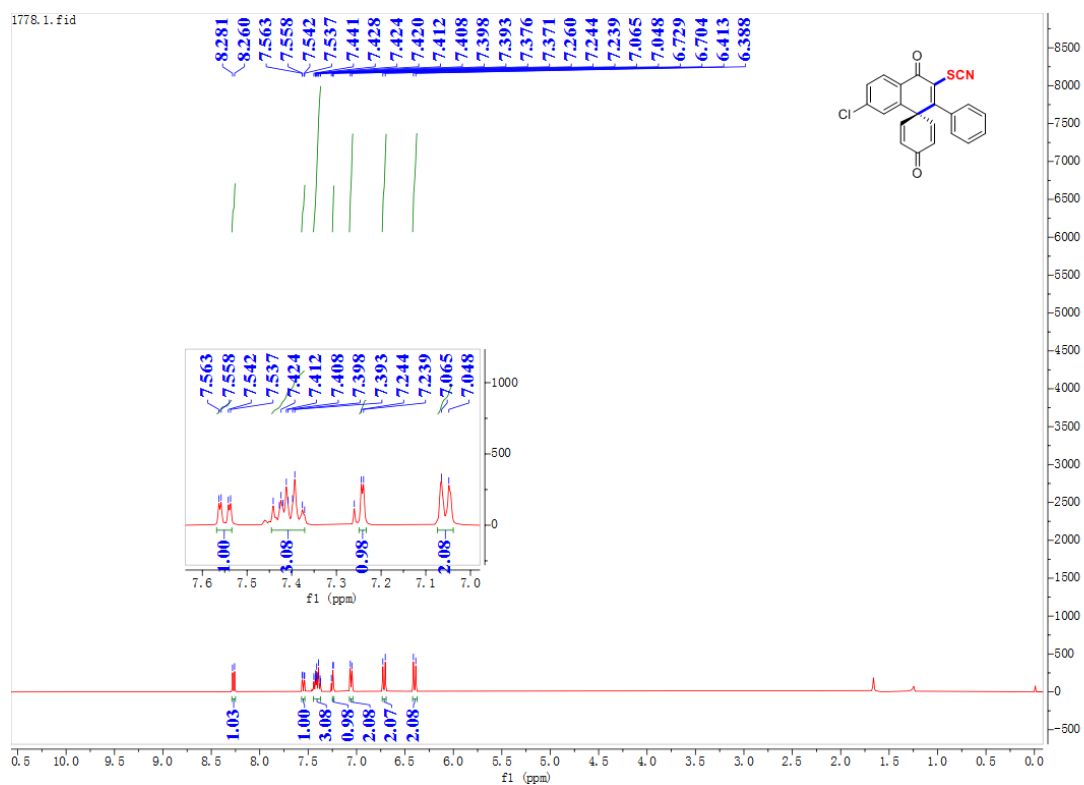

# 17-<sup>13</sup>C NMR

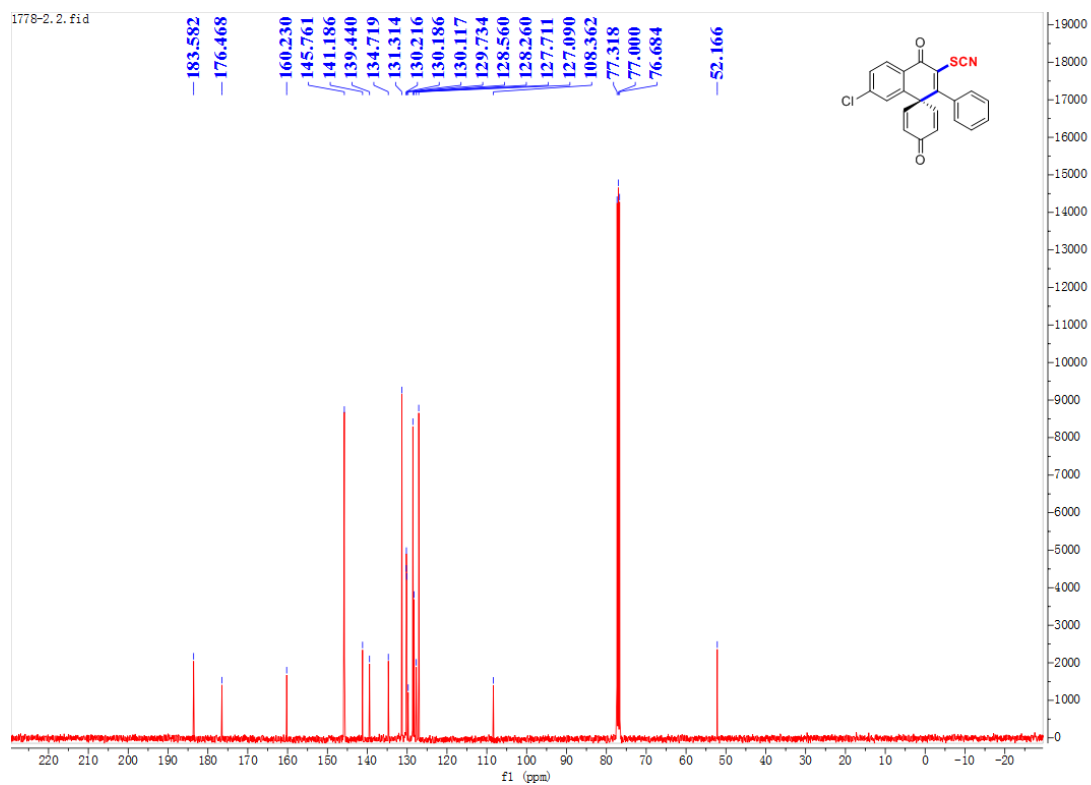

### 18-<sup>1</sup>H NMR

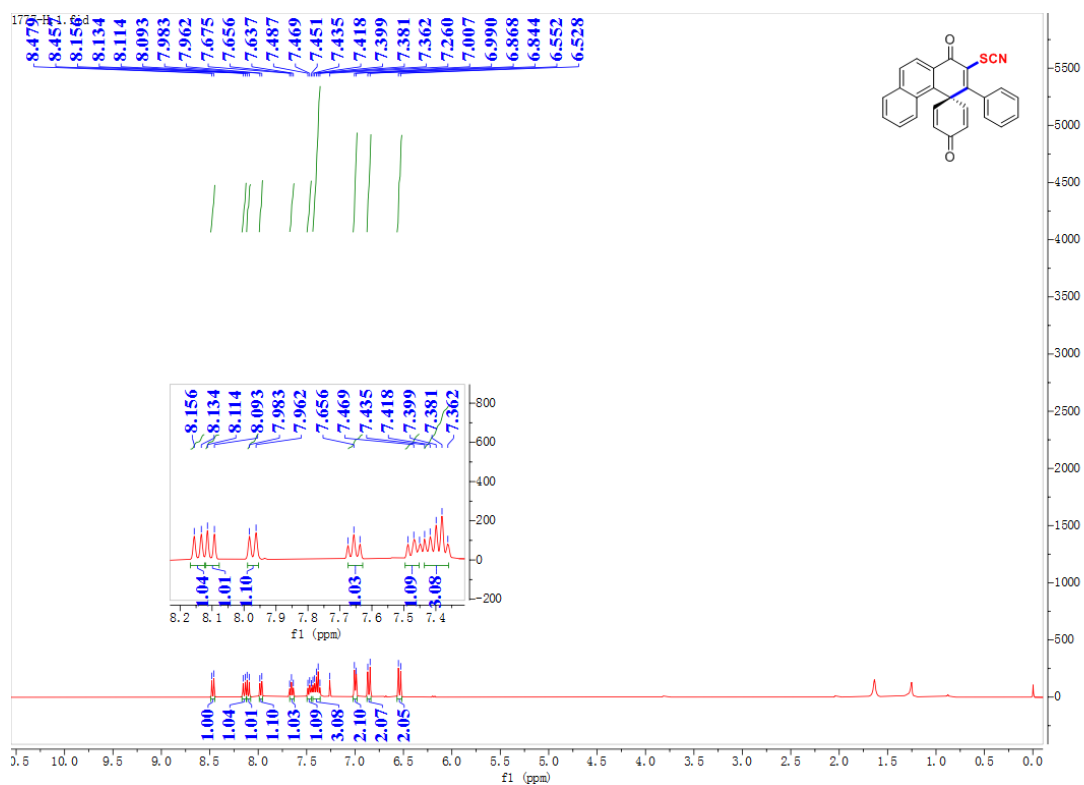

### 18-<sup>13</sup>C NMR

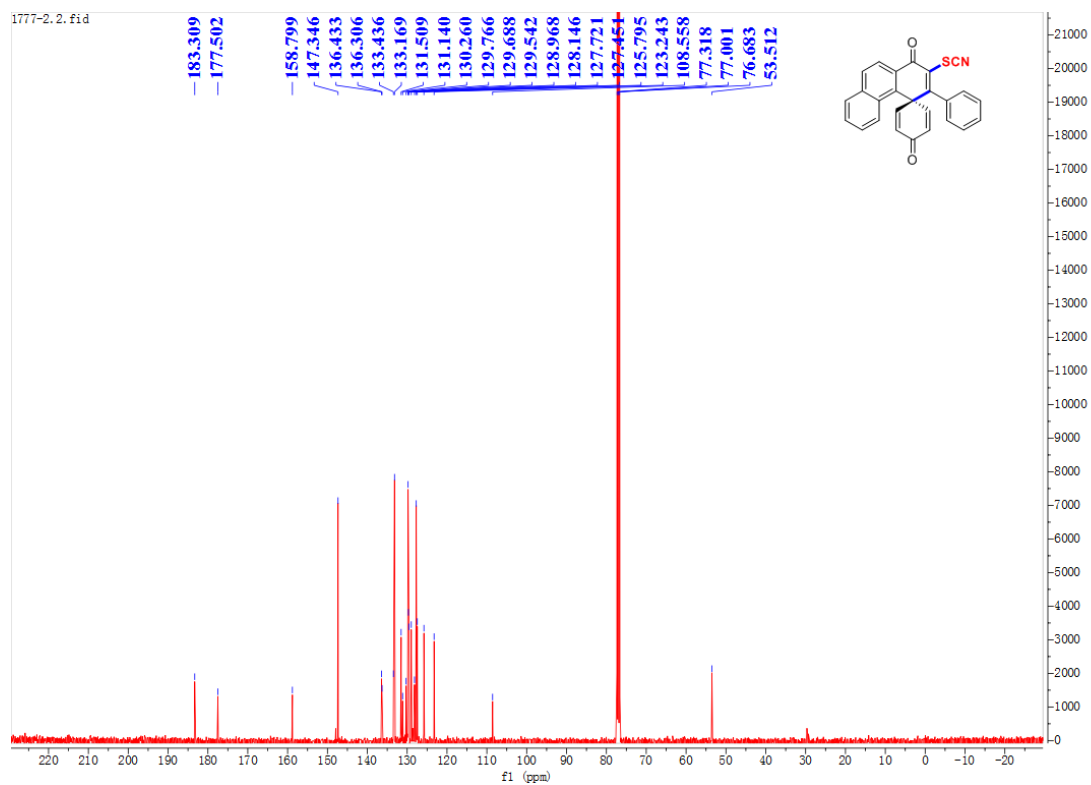



# 19-<sup>1</sup>H NMR

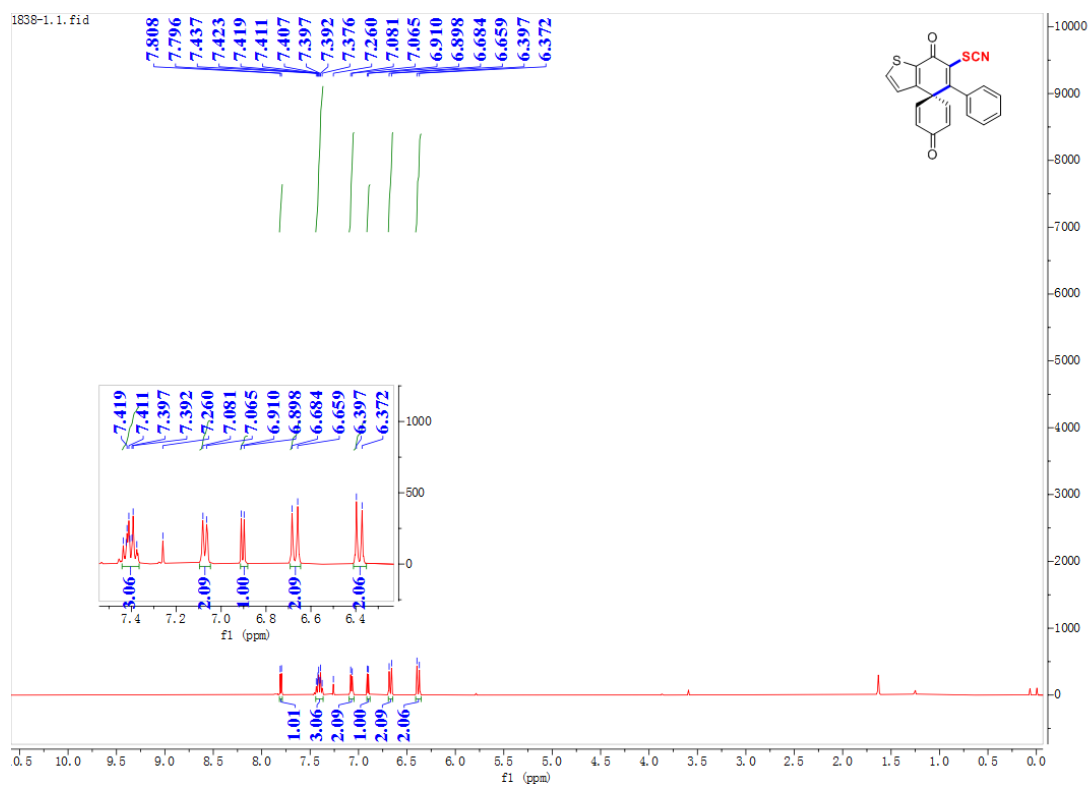

# 19-<sup>13</sup>C NMR

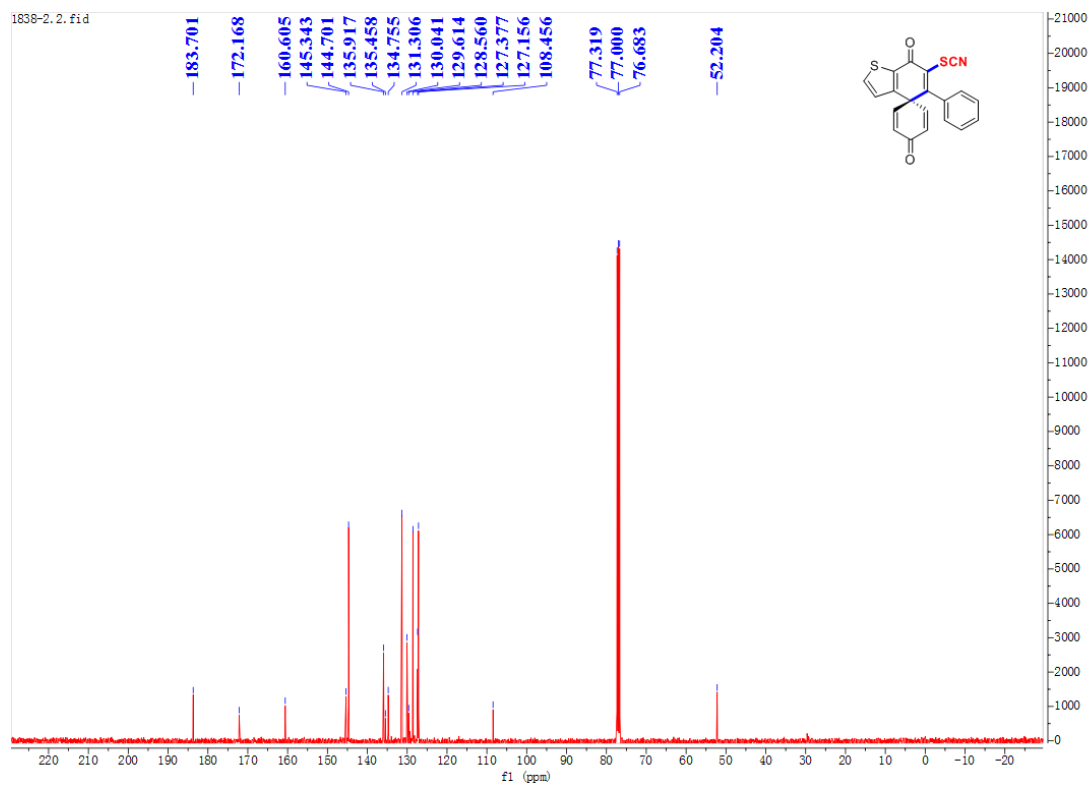

## 20-<sup>1</sup>H NMR

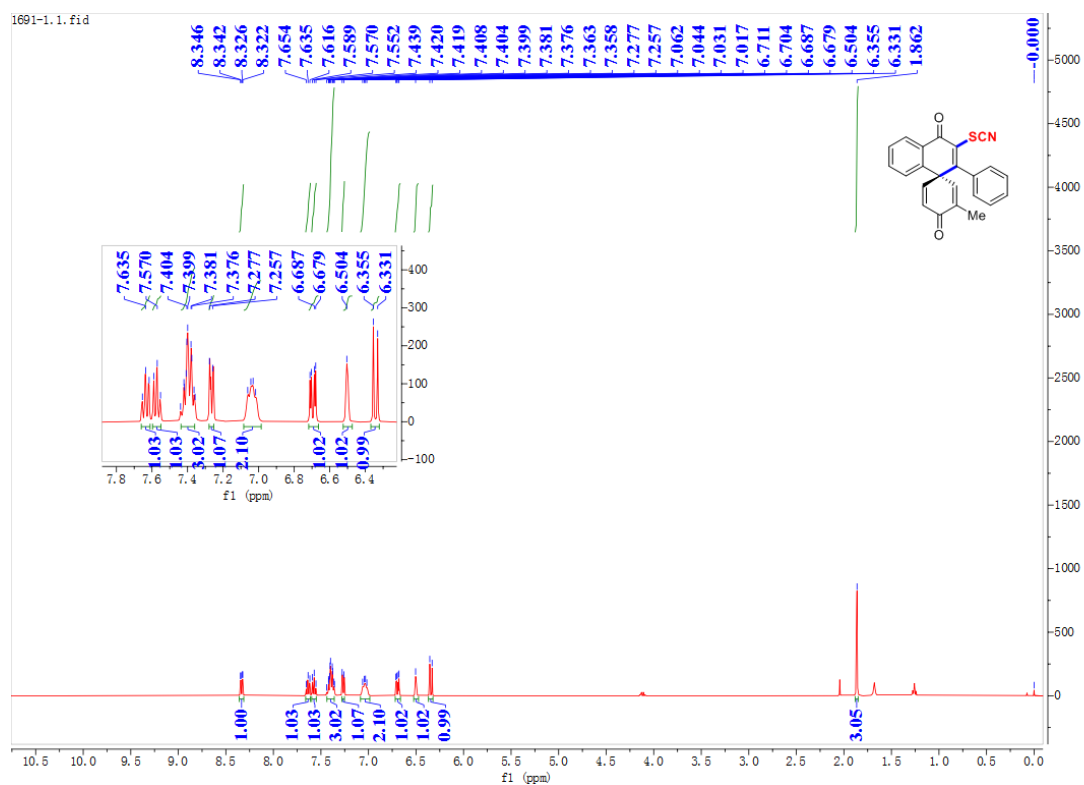

## 20-<sup>13</sup>C NMR

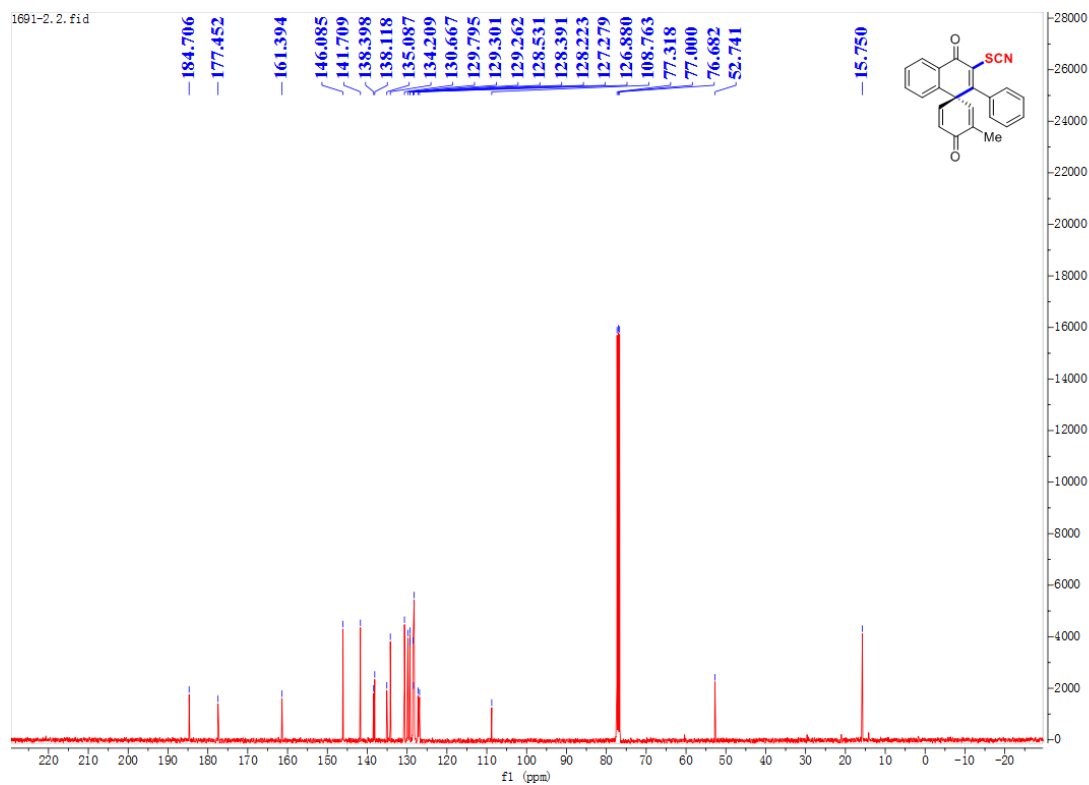

## 21-<sup>1</sup>H NMR

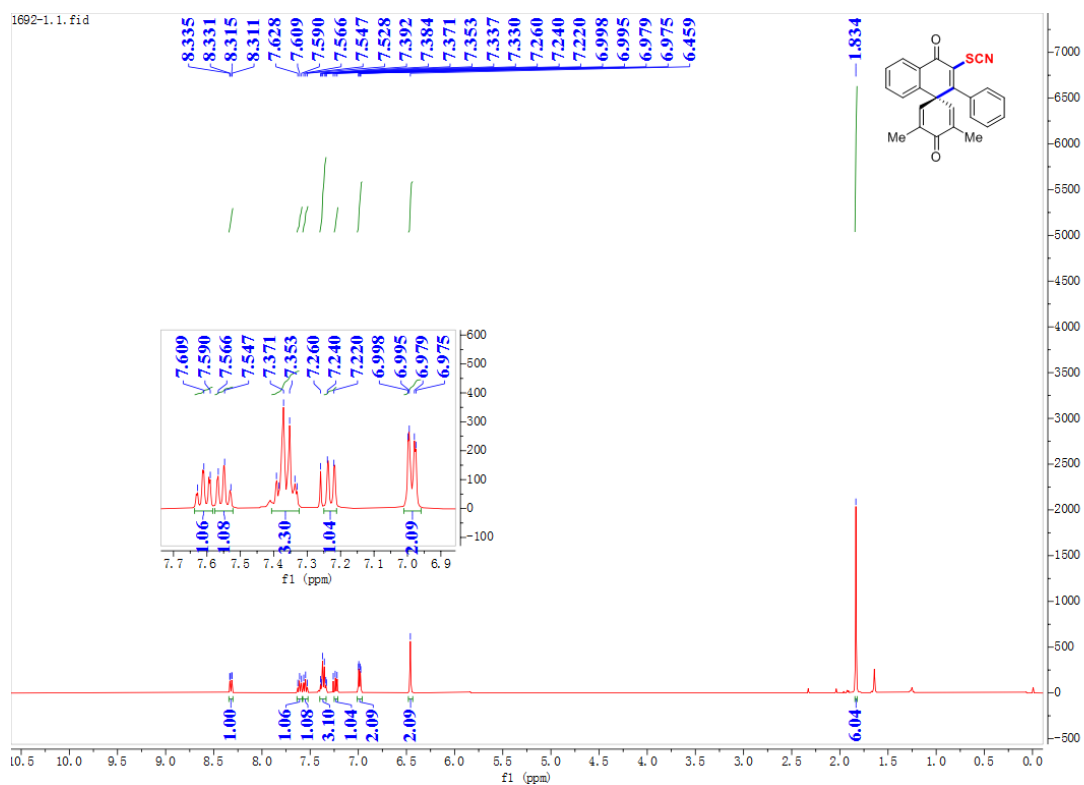

## 21-<sup>13</sup>C NMR

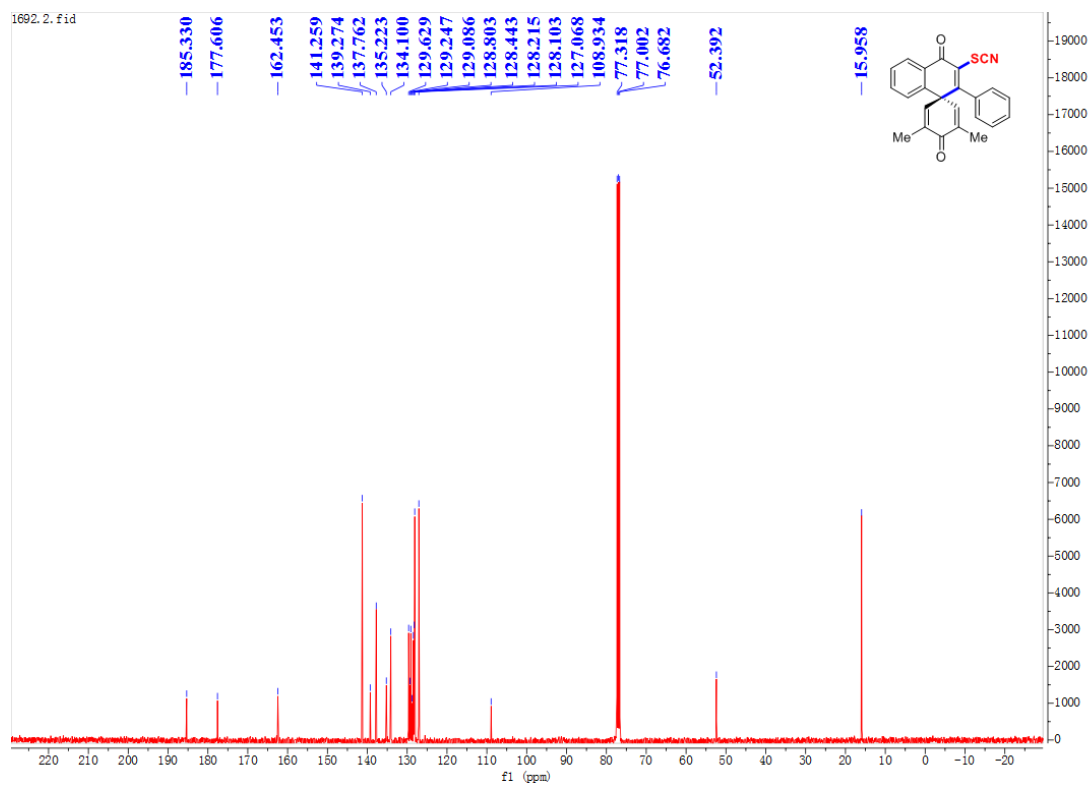

## 22-<sup>1</sup>H NMR

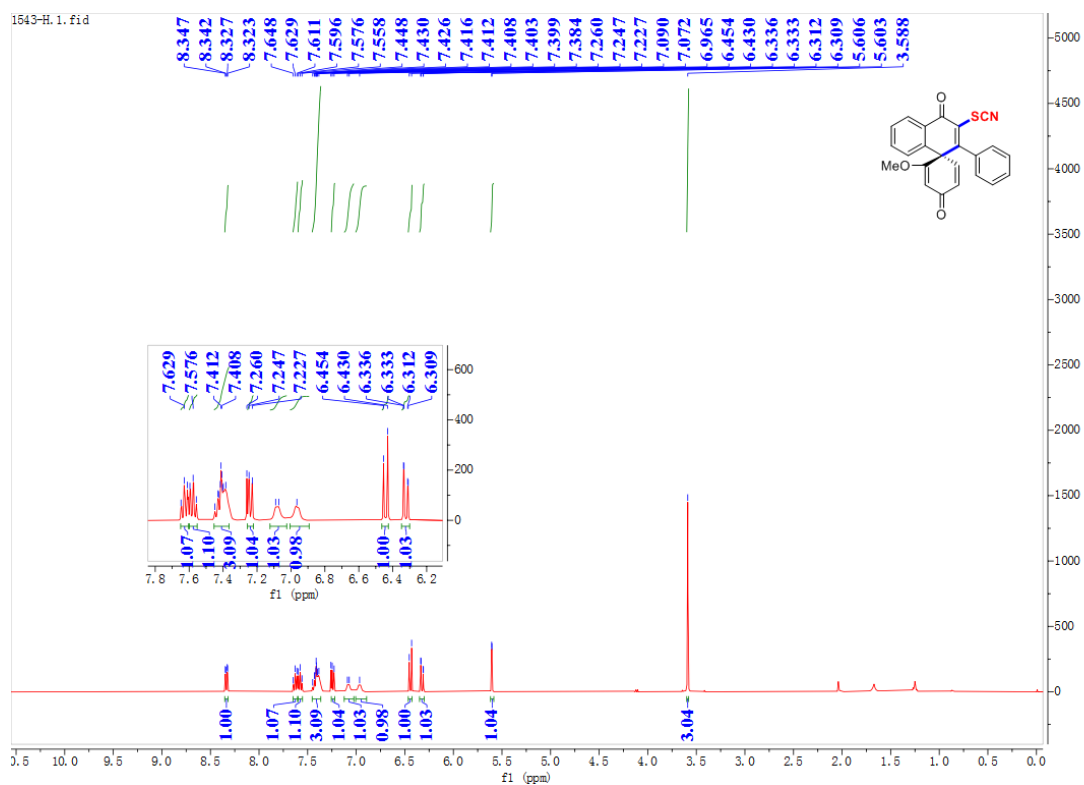

## 22-<sup>13</sup>C NMR

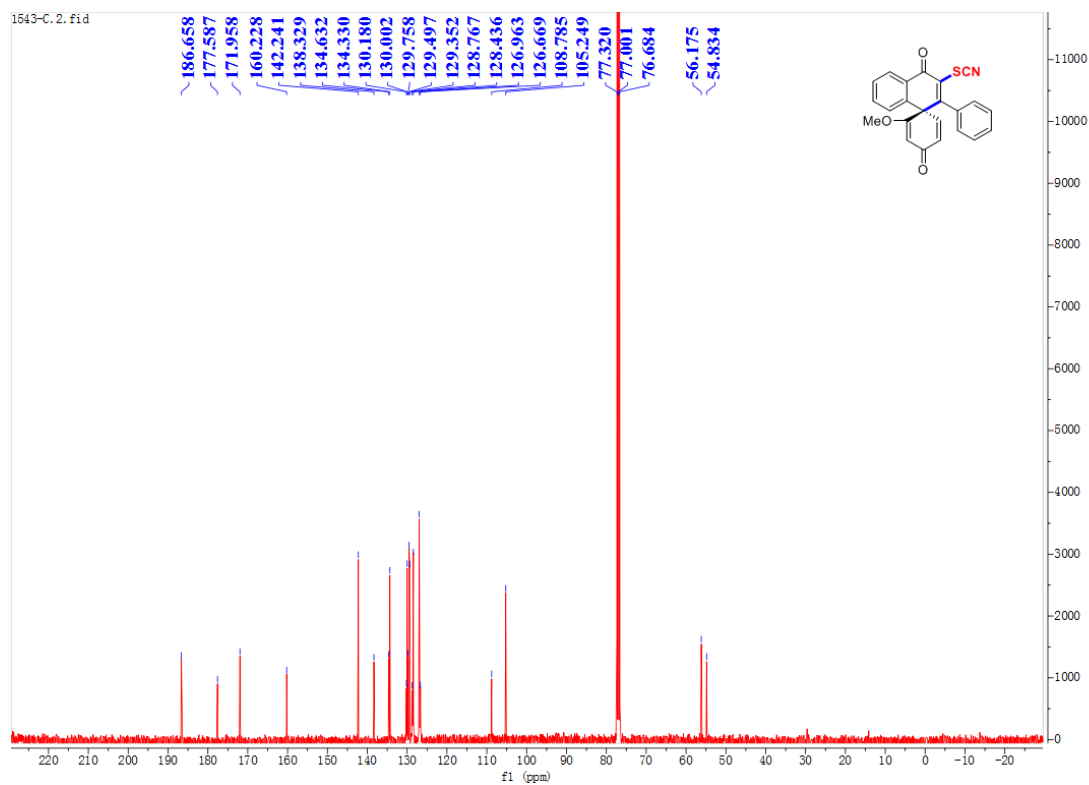

## 23-<sup>1</sup>H NMR

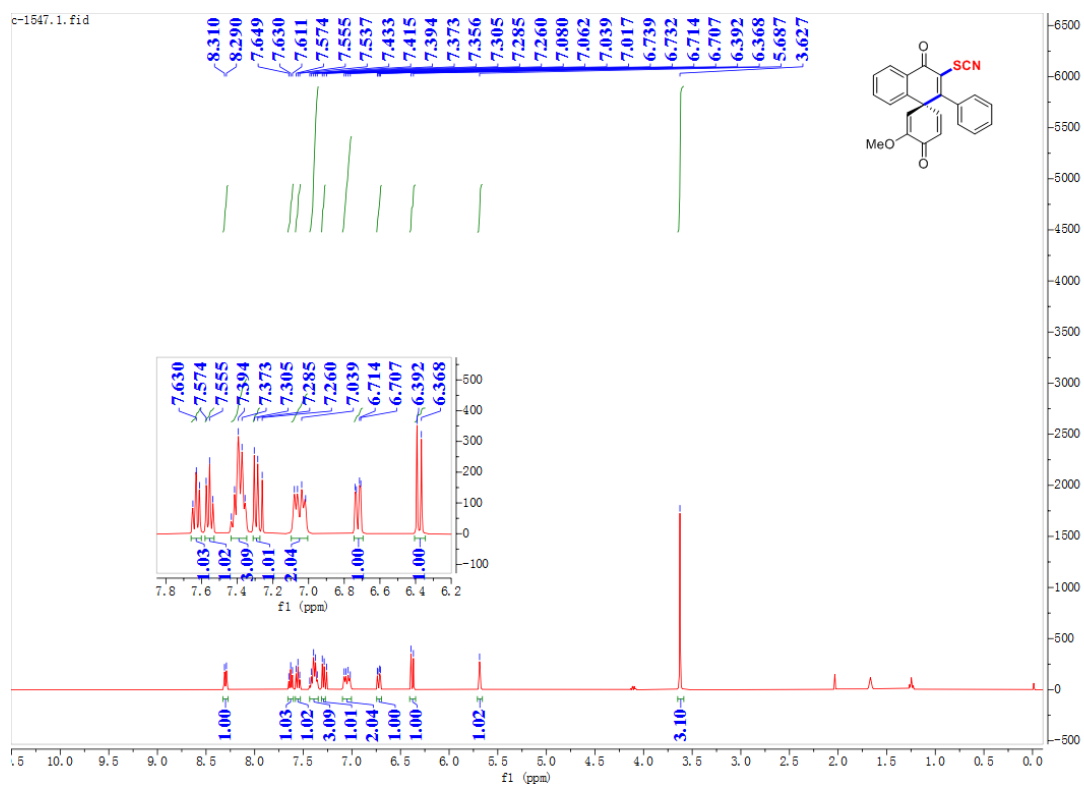

## 23-<sup>13</sup>C NMR

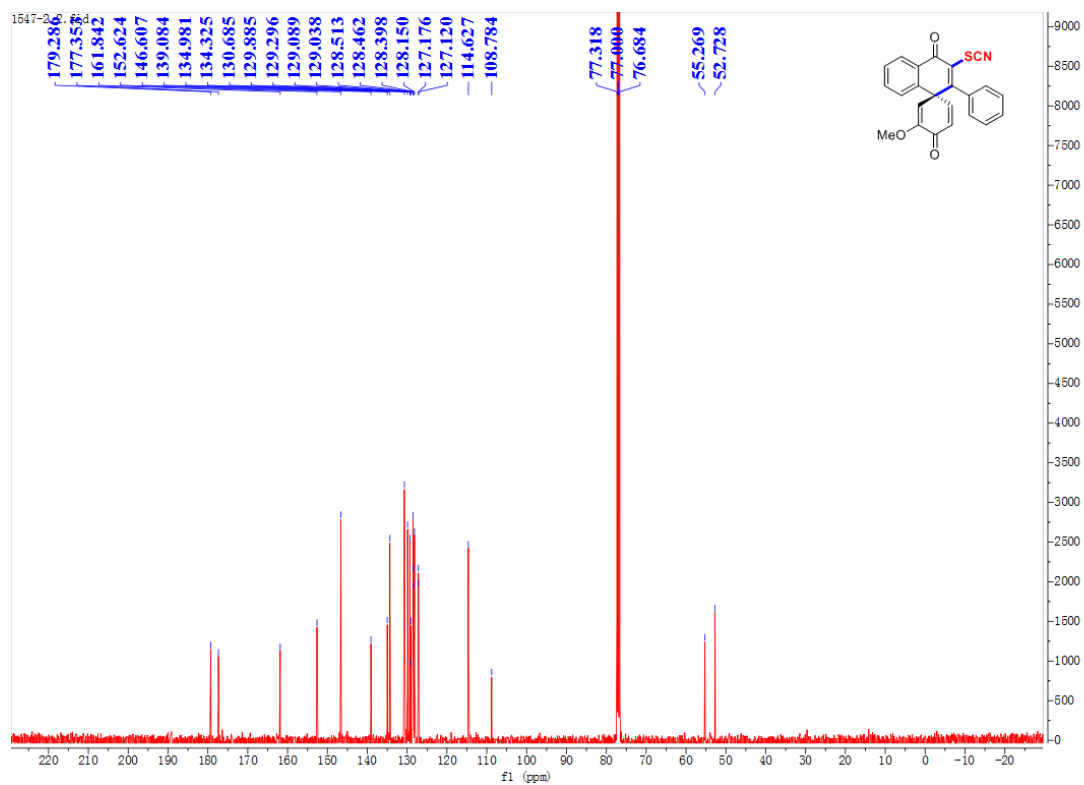

## 24-<sup>1</sup>H NMR

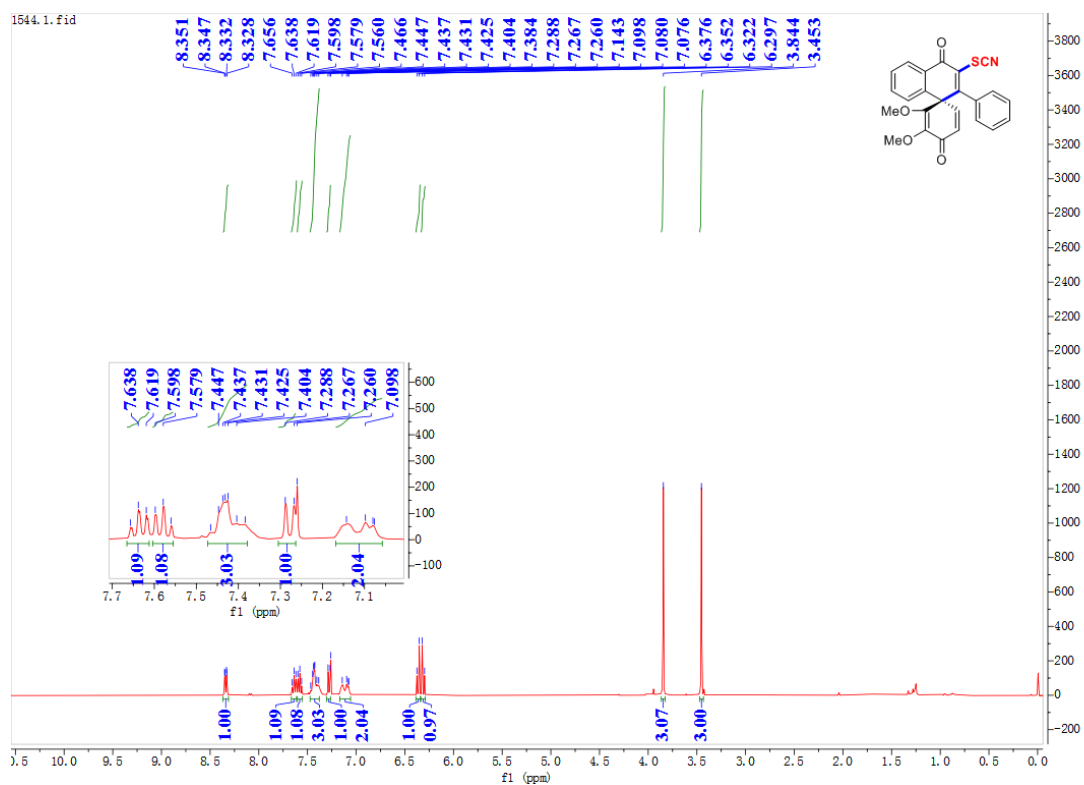

## 24-<sup>13</sup>C NMR

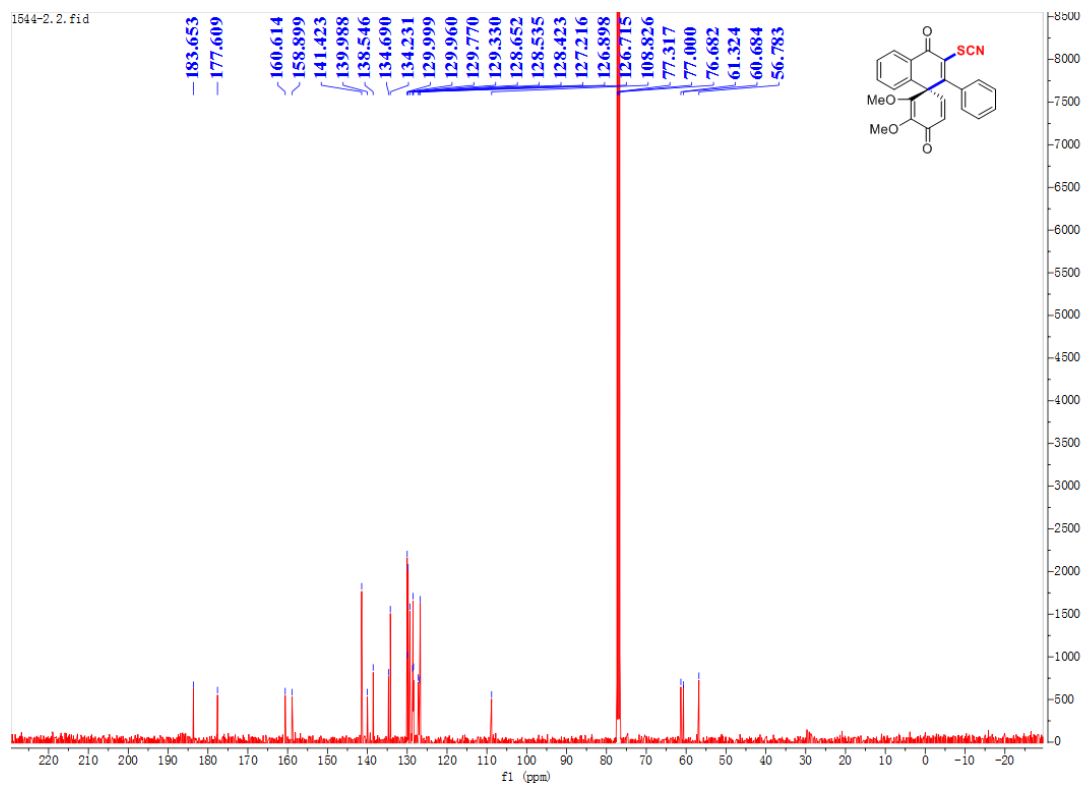

## 25-<sup>1</sup>H NMR

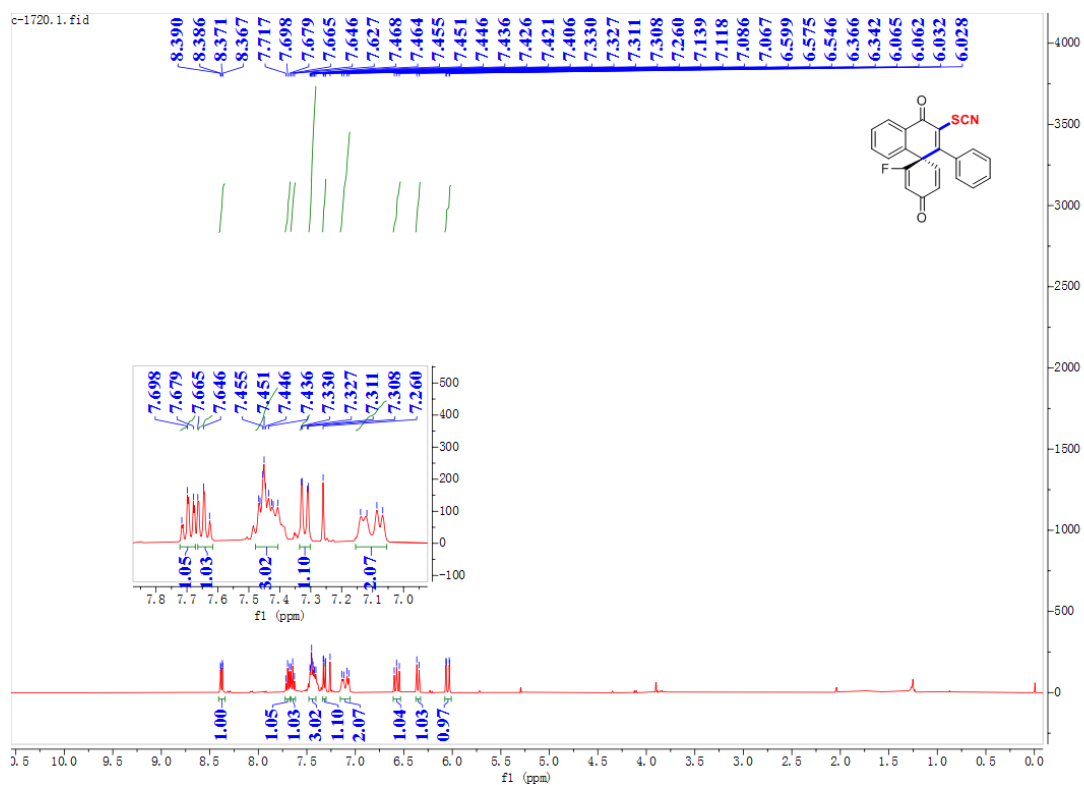

## 25-<sup>13</sup>C NMR

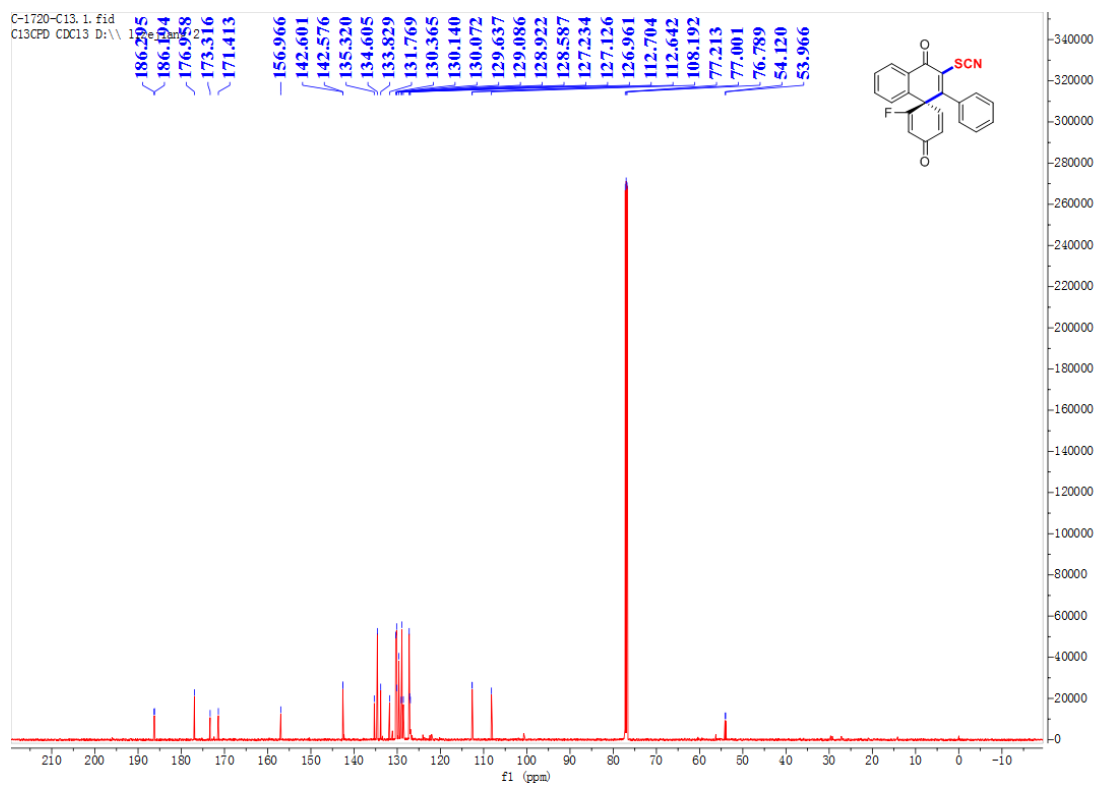

## 25-<sup>19</sup>F NMR

C-1720-F19.1.fid  
F19CPD CDCl<sub>3</sub> D:\\ lizejiang 2

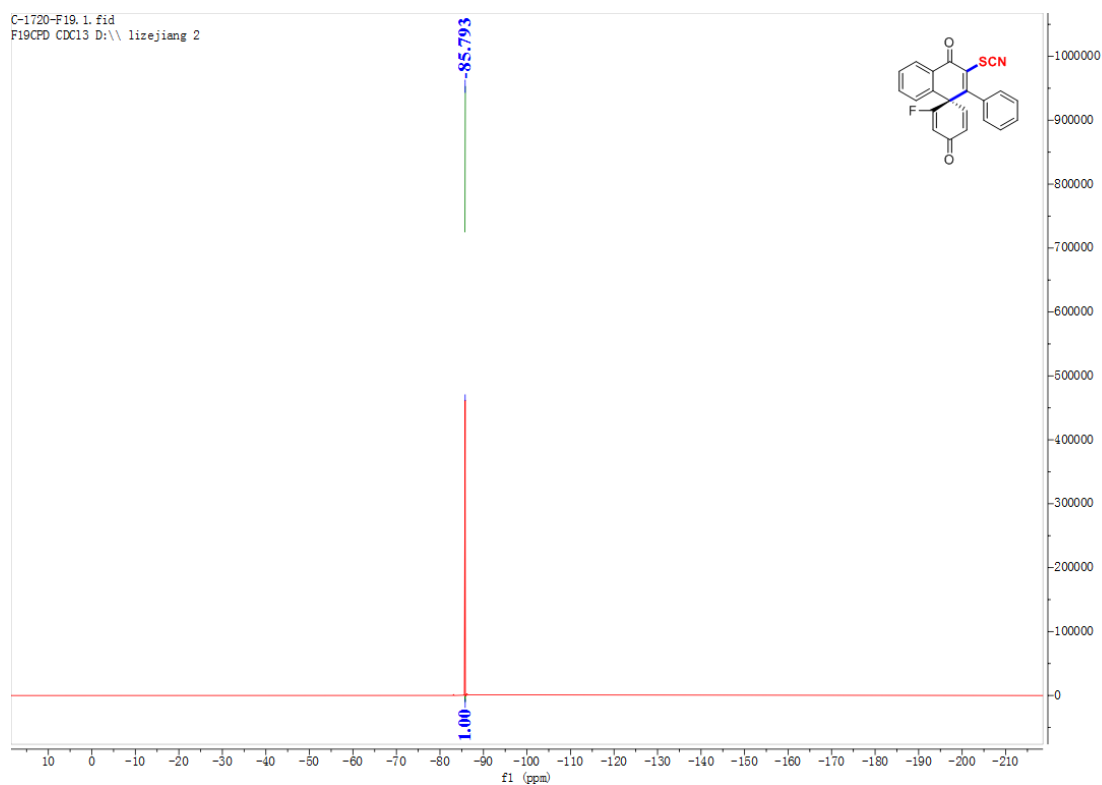

## 26-<sup>1</sup>H NMR

1548-1.1.fid

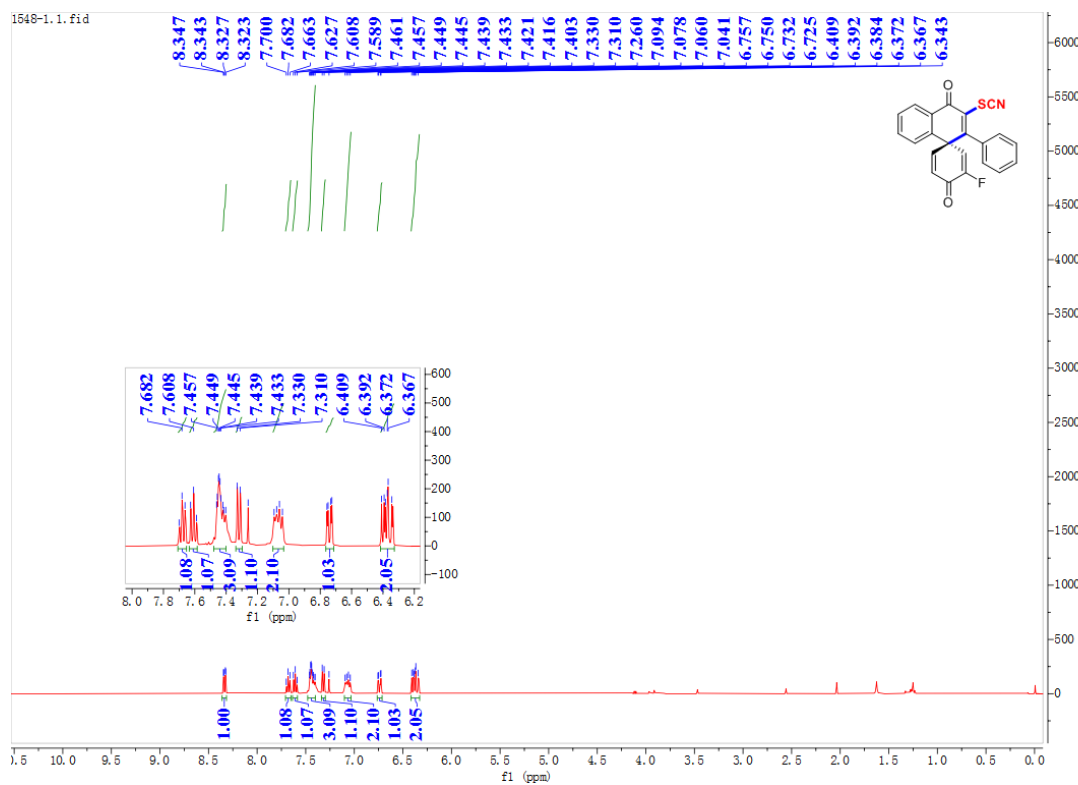



## 26-<sup>13</sup>C NMR

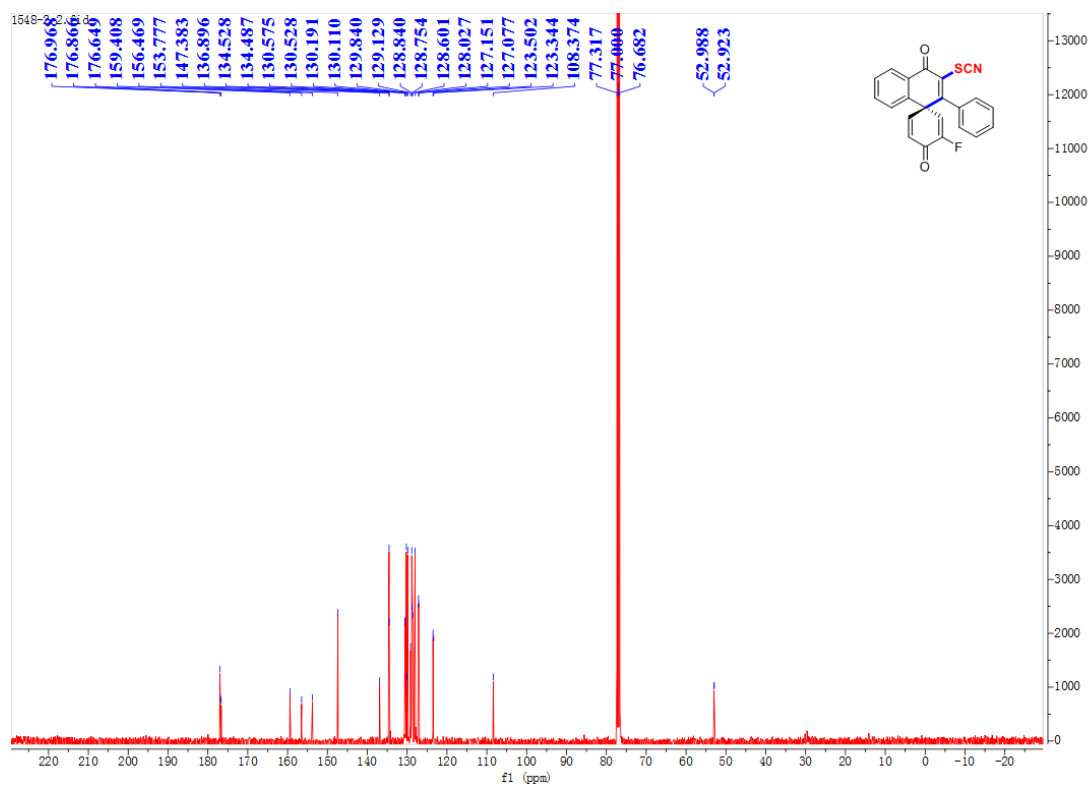

## 26-<sup>19</sup>F NMR

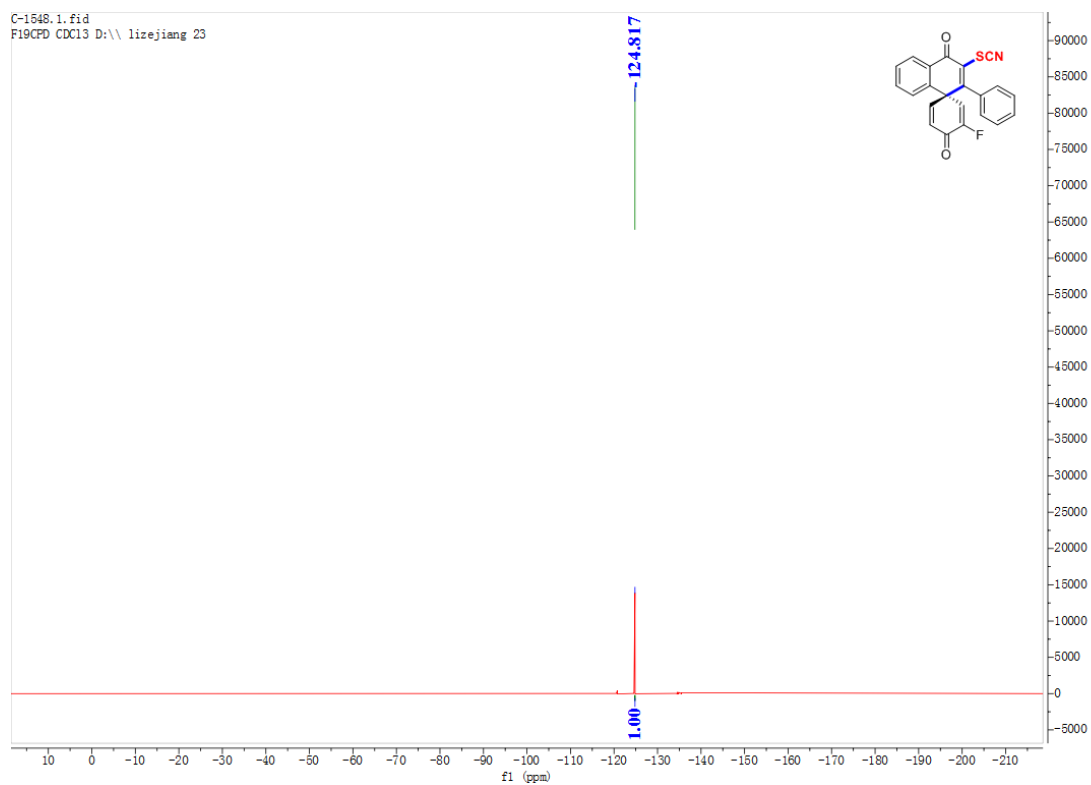

## 27-<sup>1</sup>H NMR

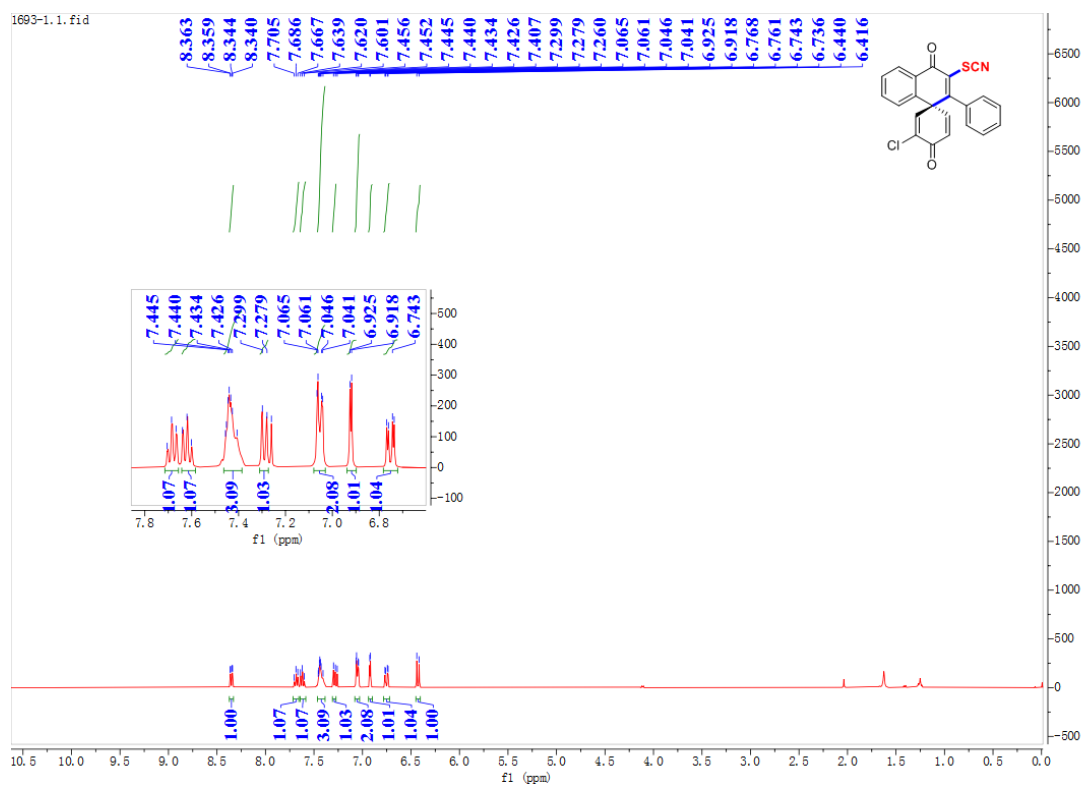

## 27-<sup>13</sup>C NMR

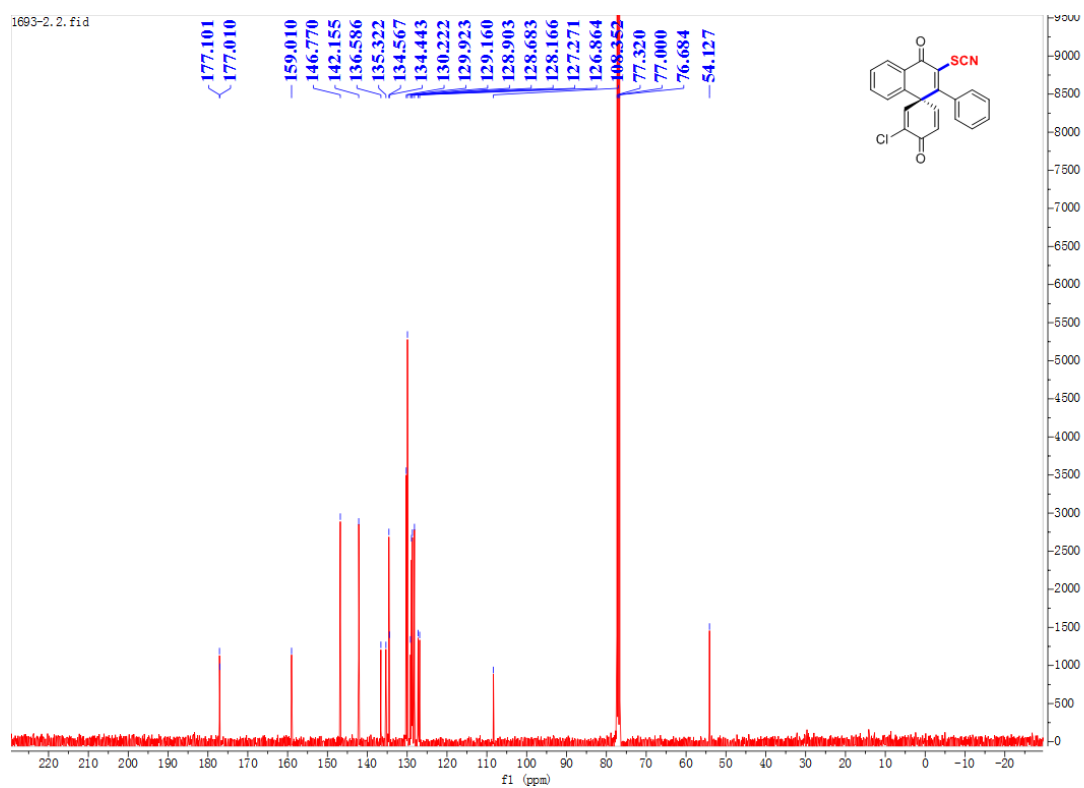

## 28-<sup>1</sup>H NMR

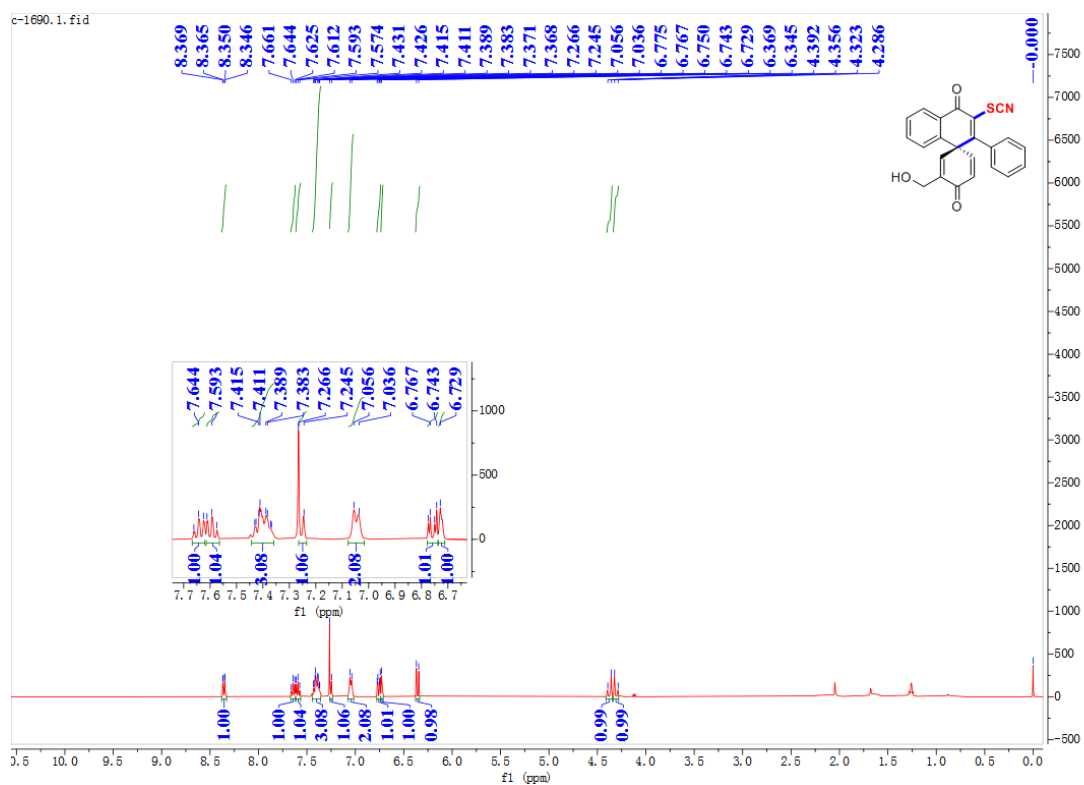

## 28-<sup>13</sup>C NMR

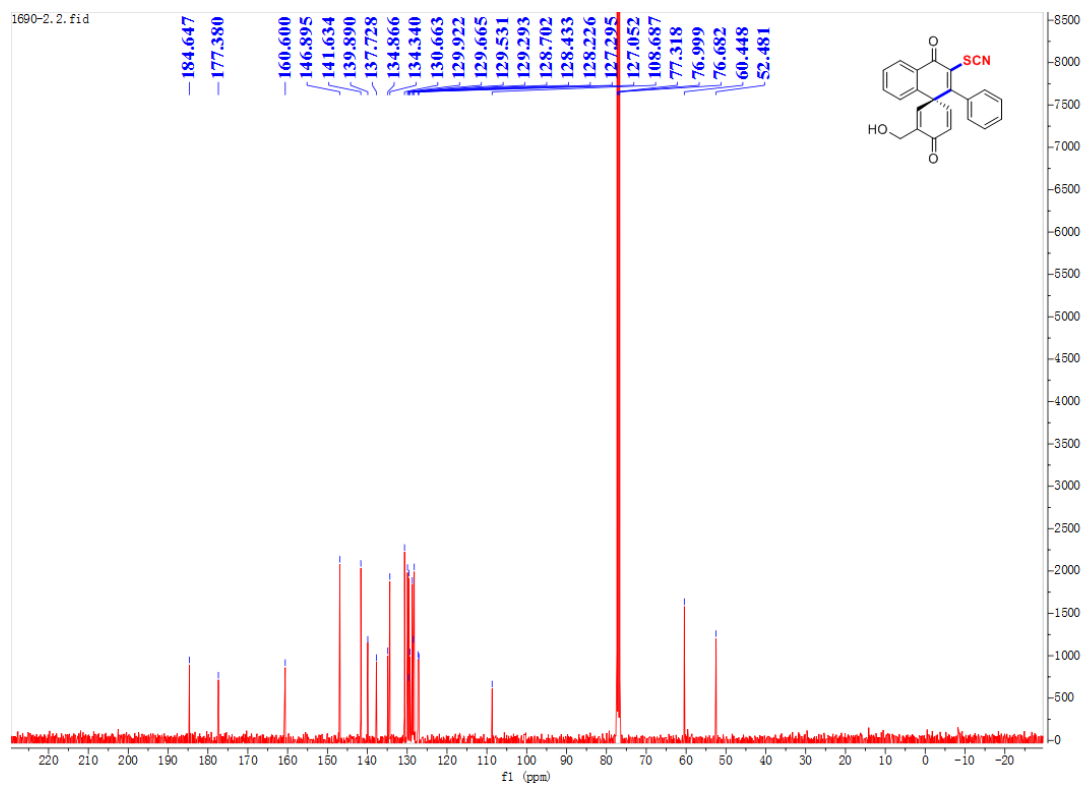

## 29-<sup>1</sup>H NMR

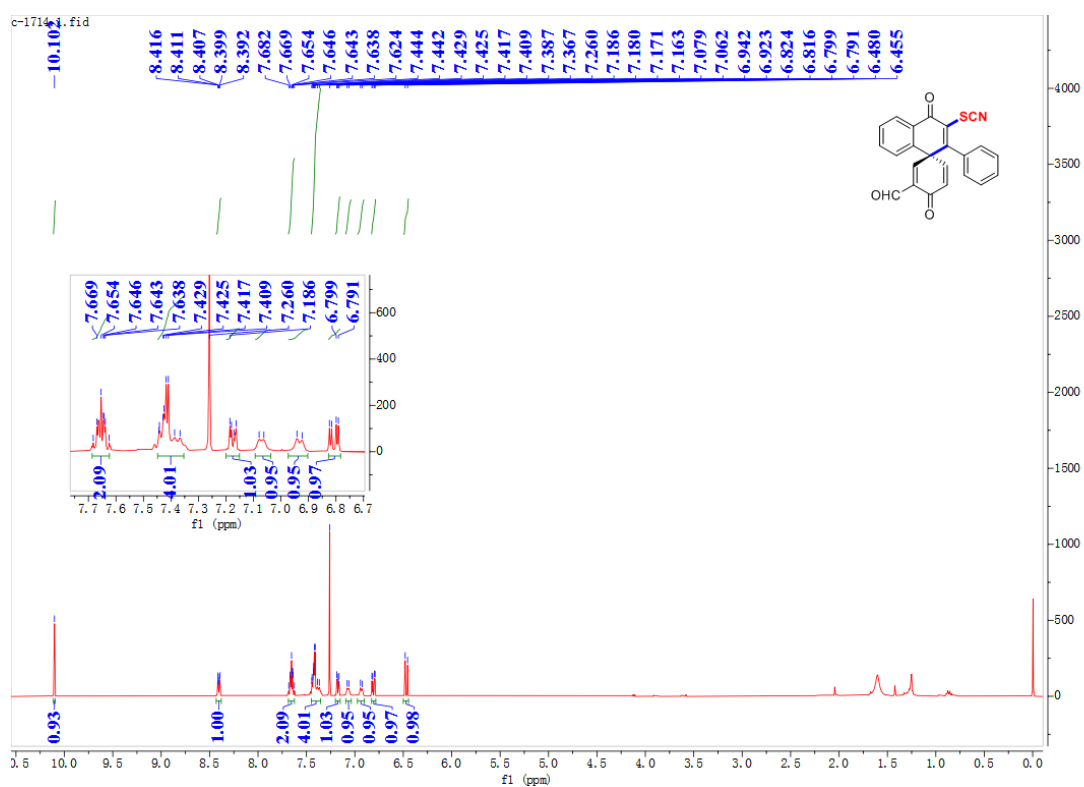

## 29-<sup>13</sup>C NMR

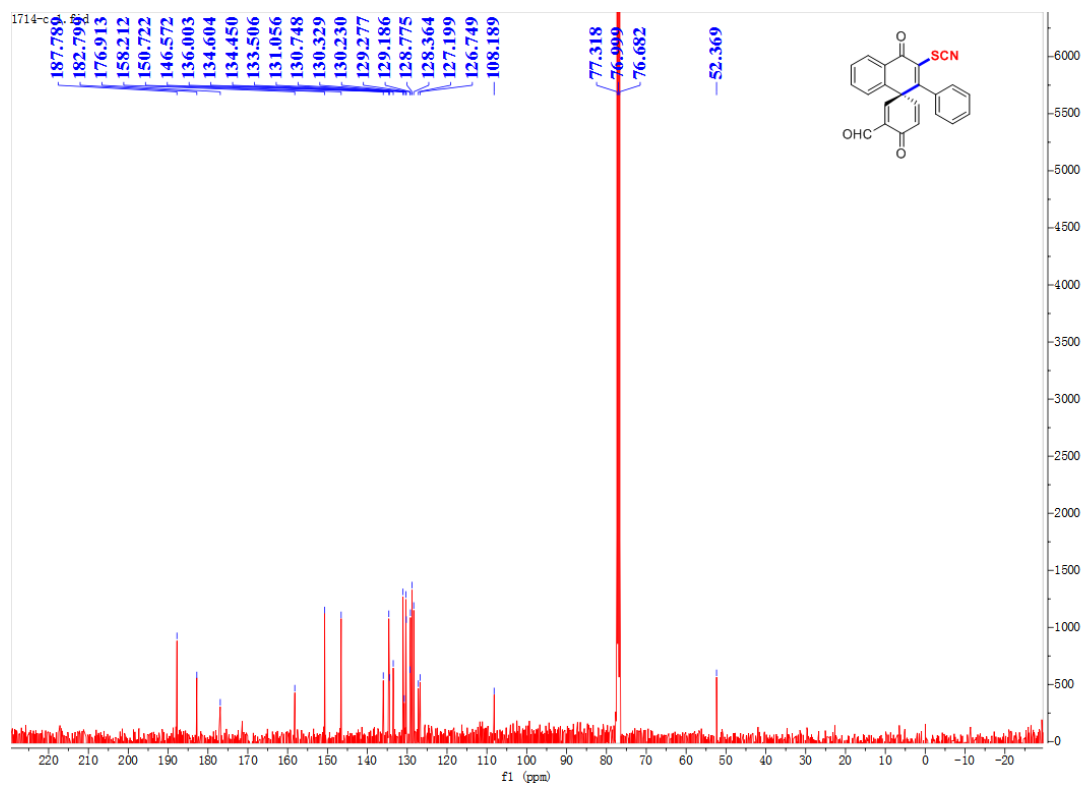

### 30-<sup>1</sup>H NMR

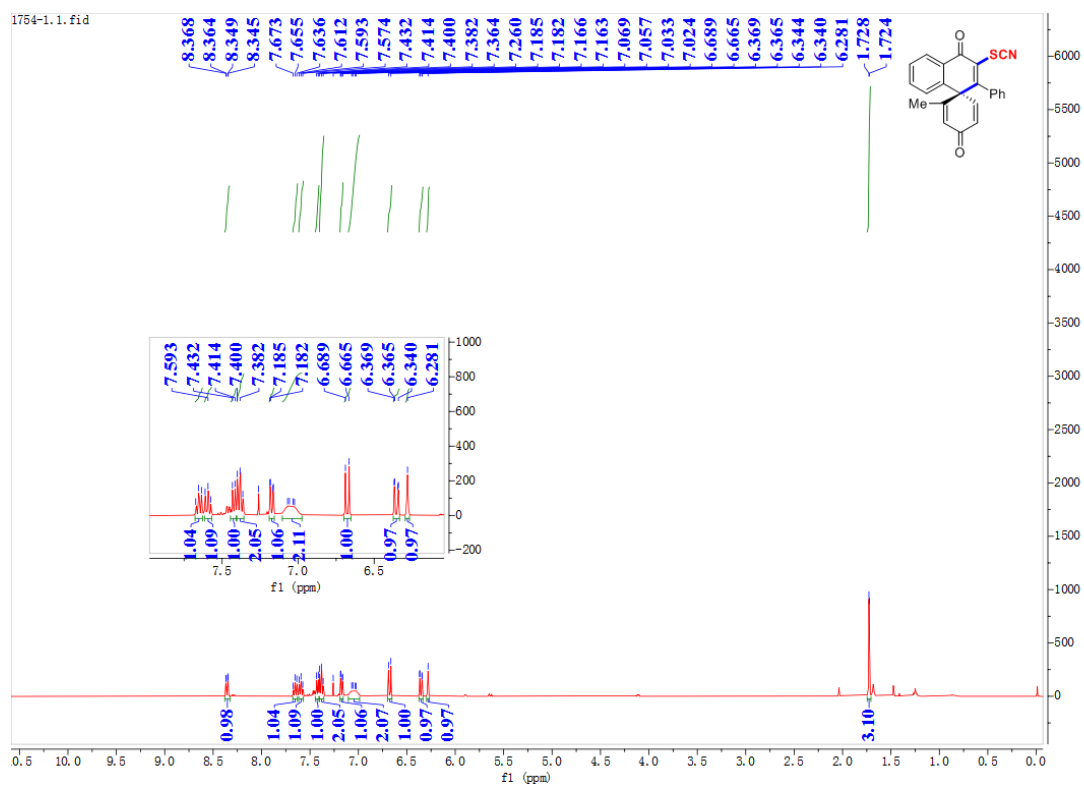

### 30-<sup>13</sup>C NMR

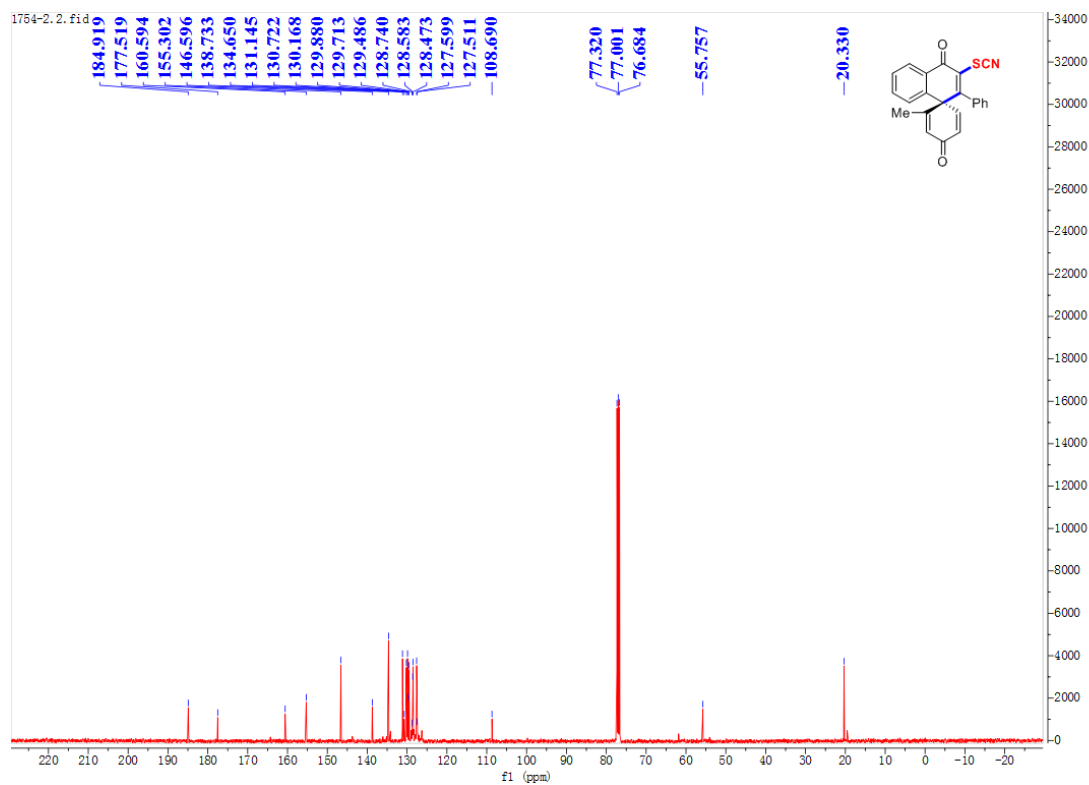

### 31-<sup>1</sup>H NMR

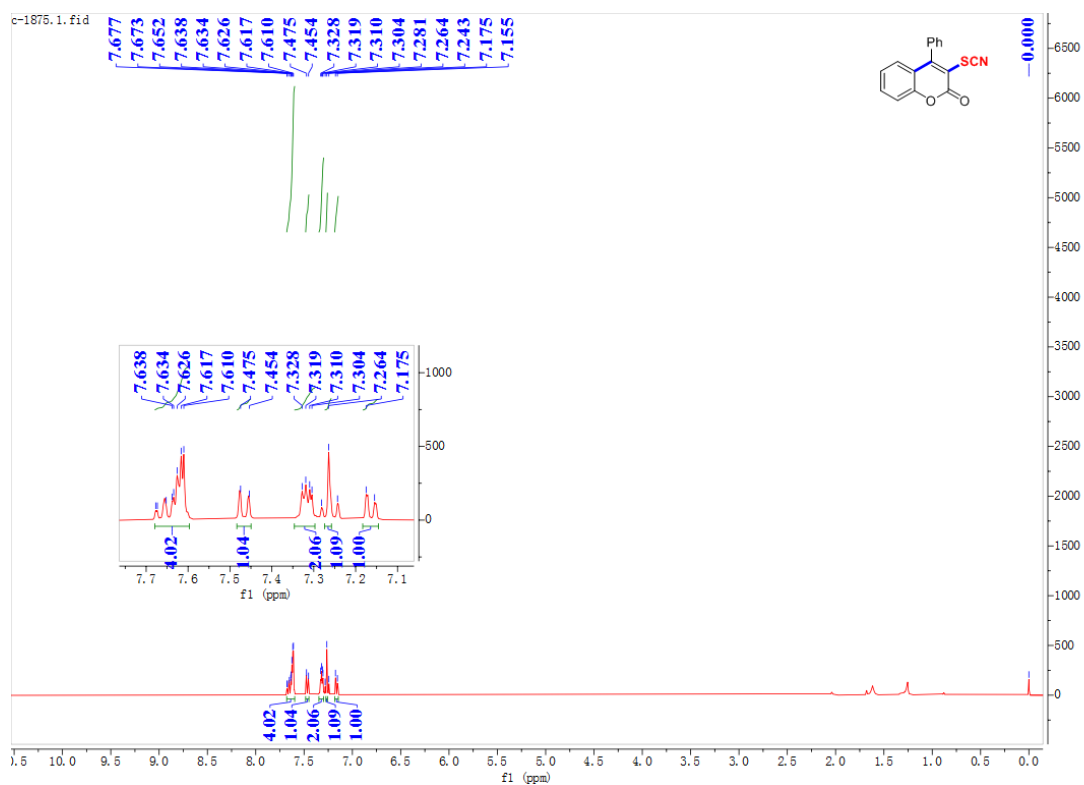

### 31-<sup>13</sup>C NMR

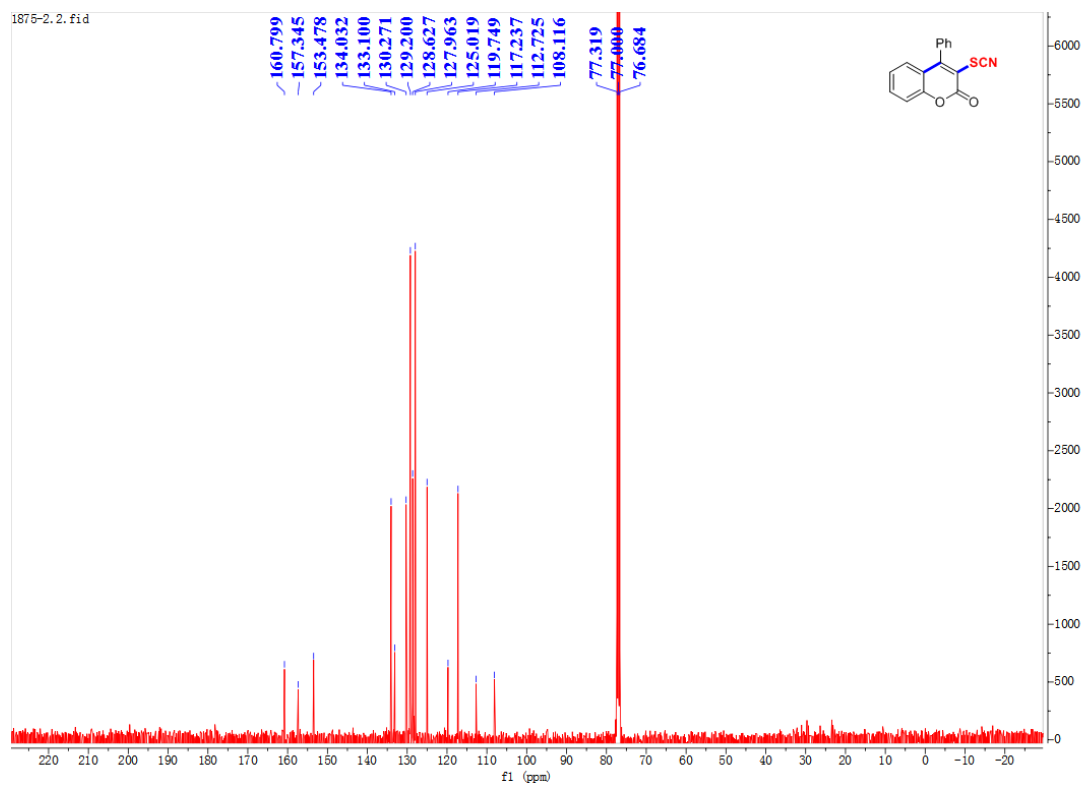

### 32-<sup>1</sup>H NMR

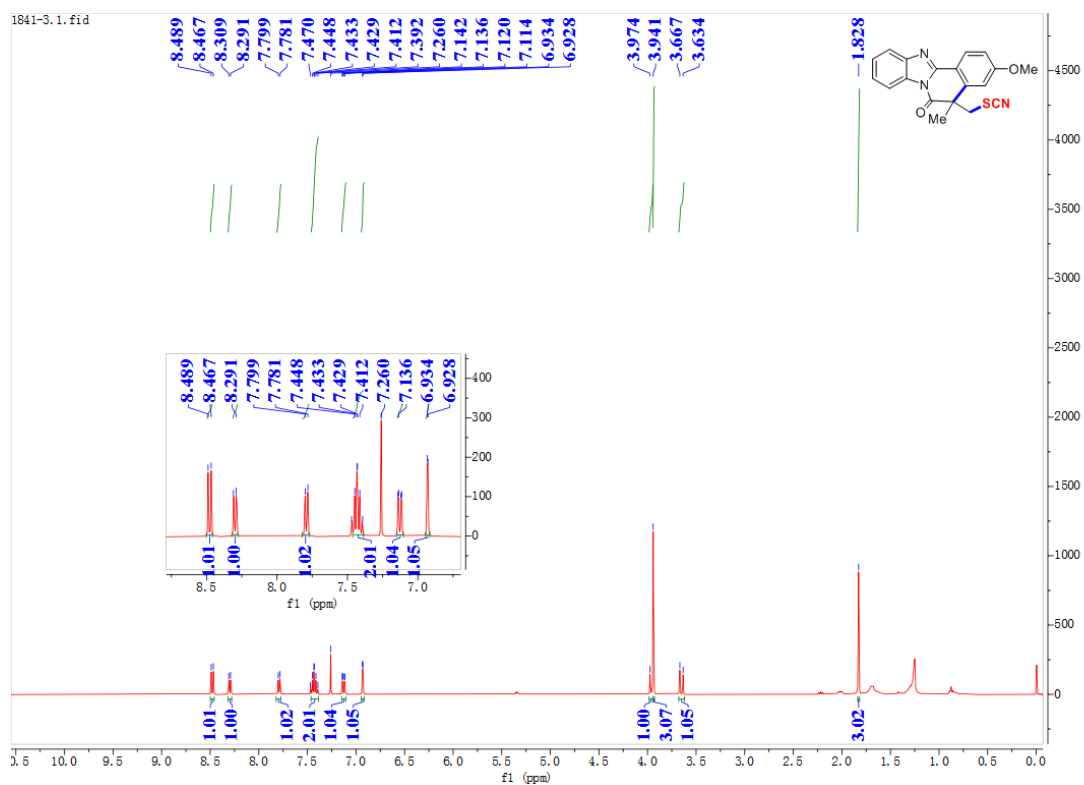

### 32-<sup>13</sup>C NMR

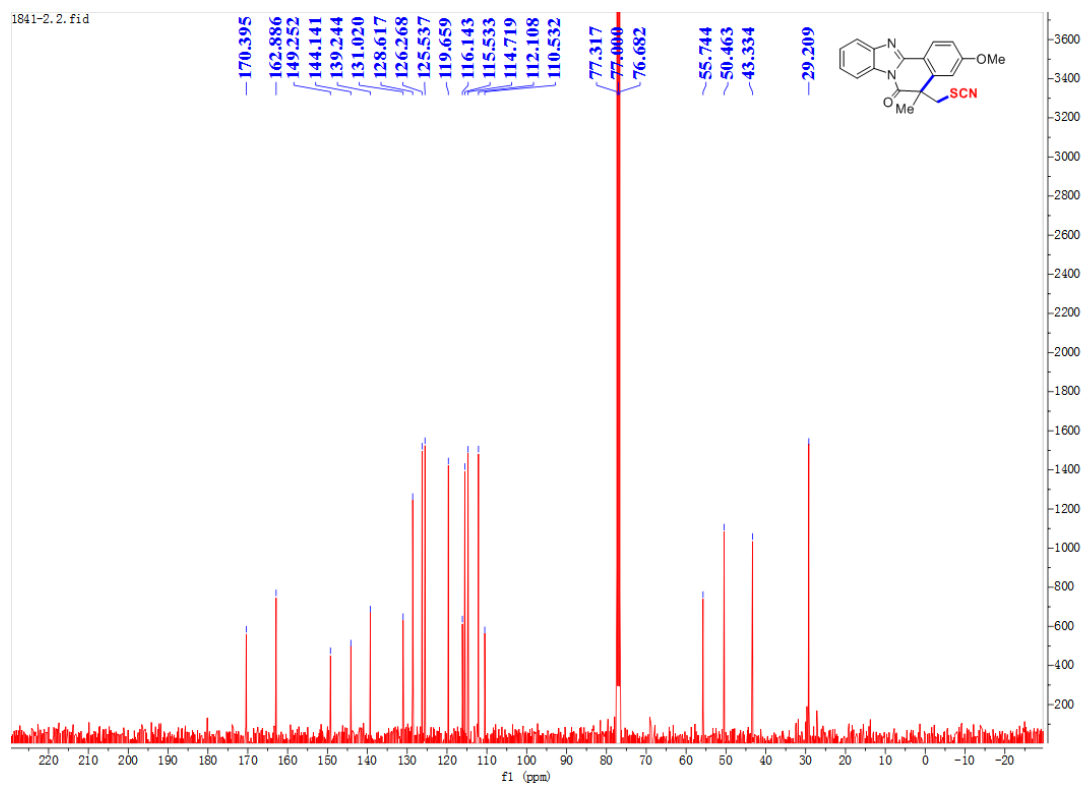

### 33-<sup>1</sup>H NMR

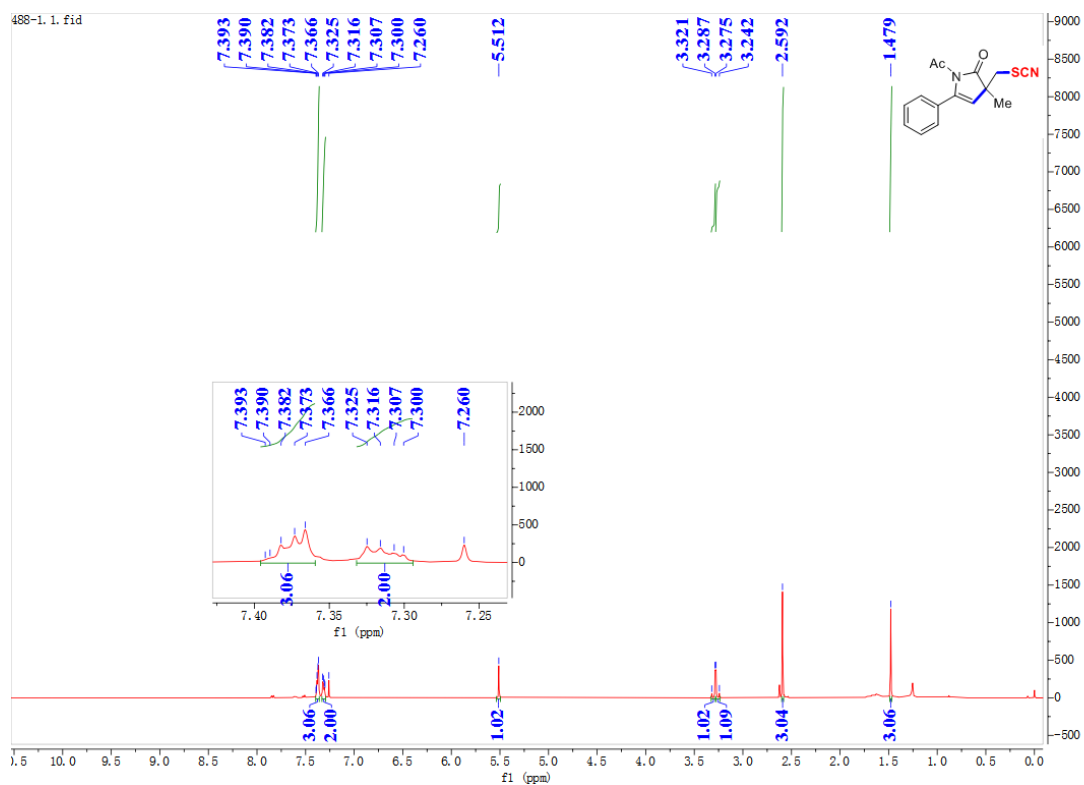

### 33-<sup>13</sup>C NMR

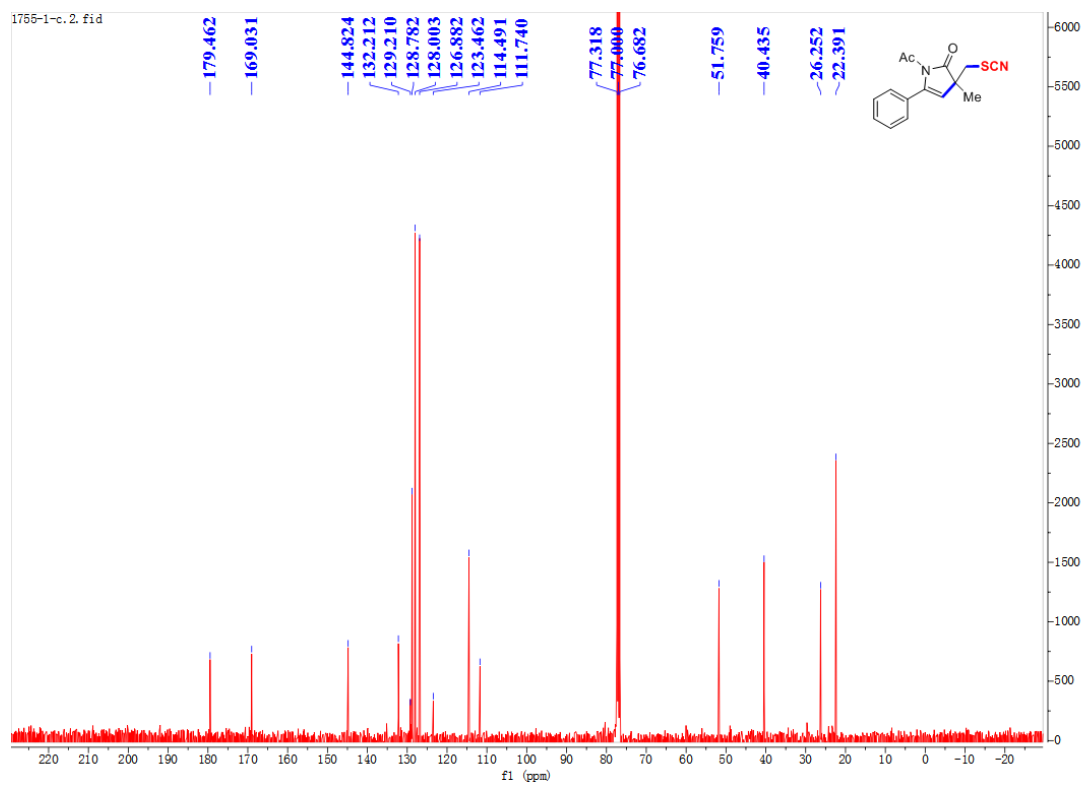



### 34-<sup>1</sup>H NMR

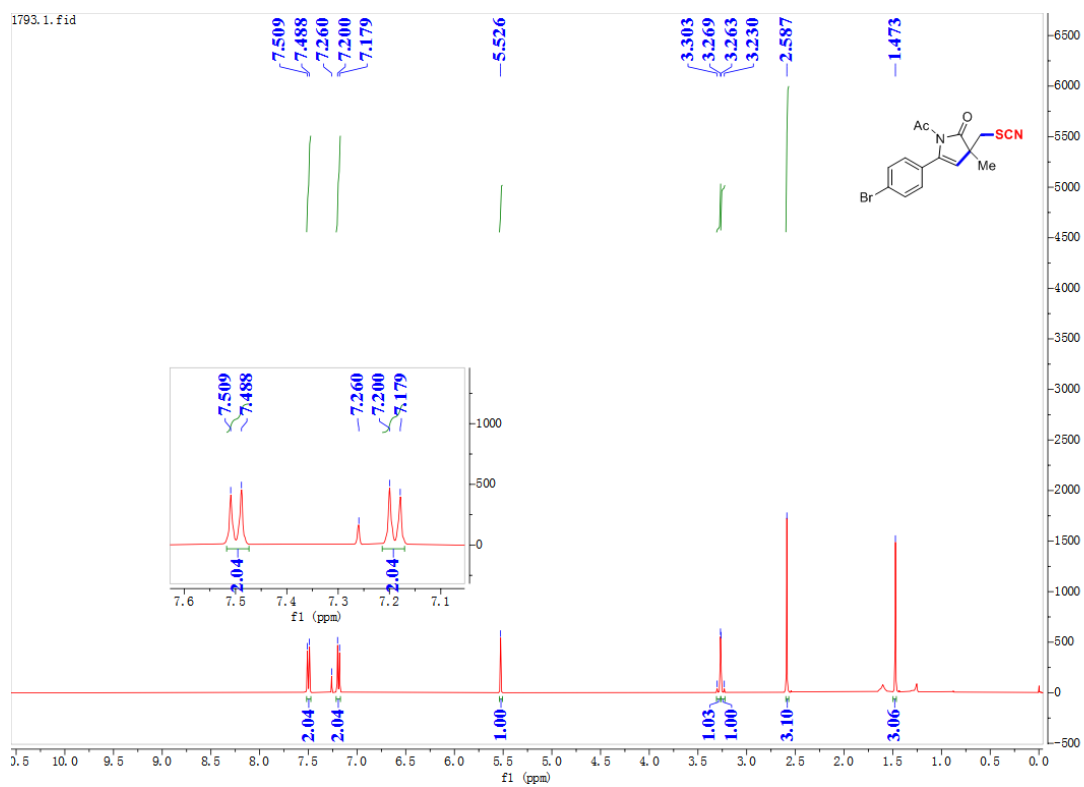

### 34-<sup>13</sup>C NMR

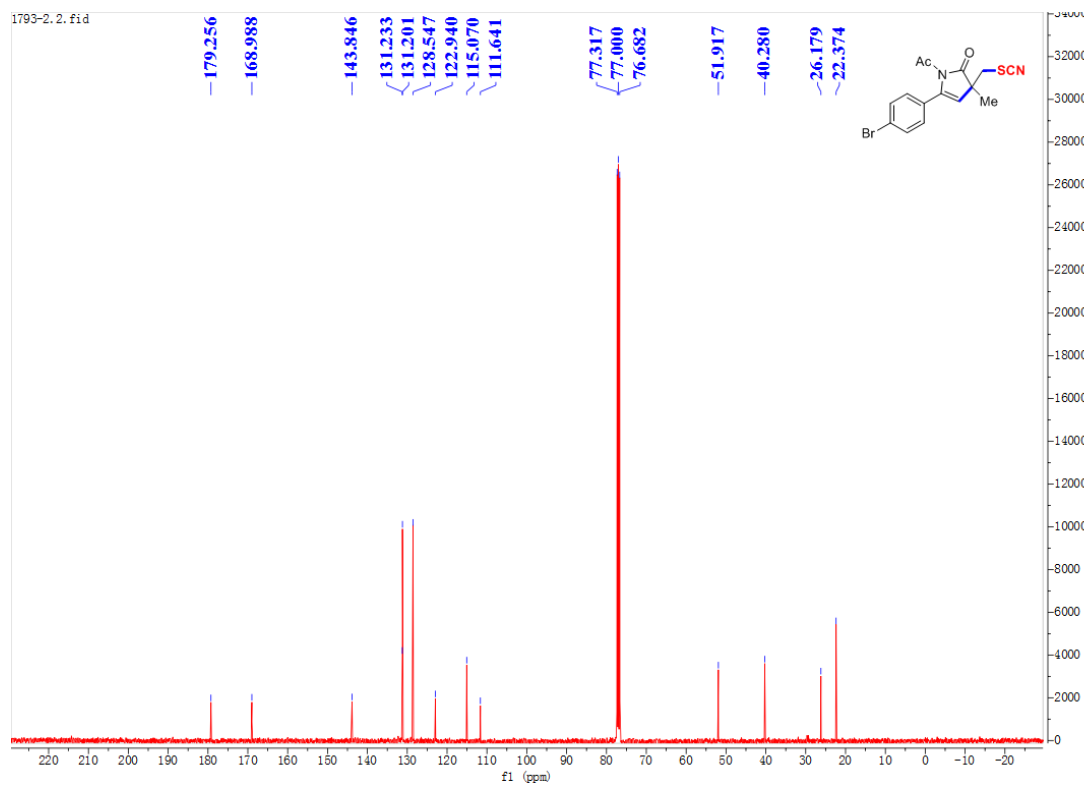

### 35-<sup>1</sup>H NMR

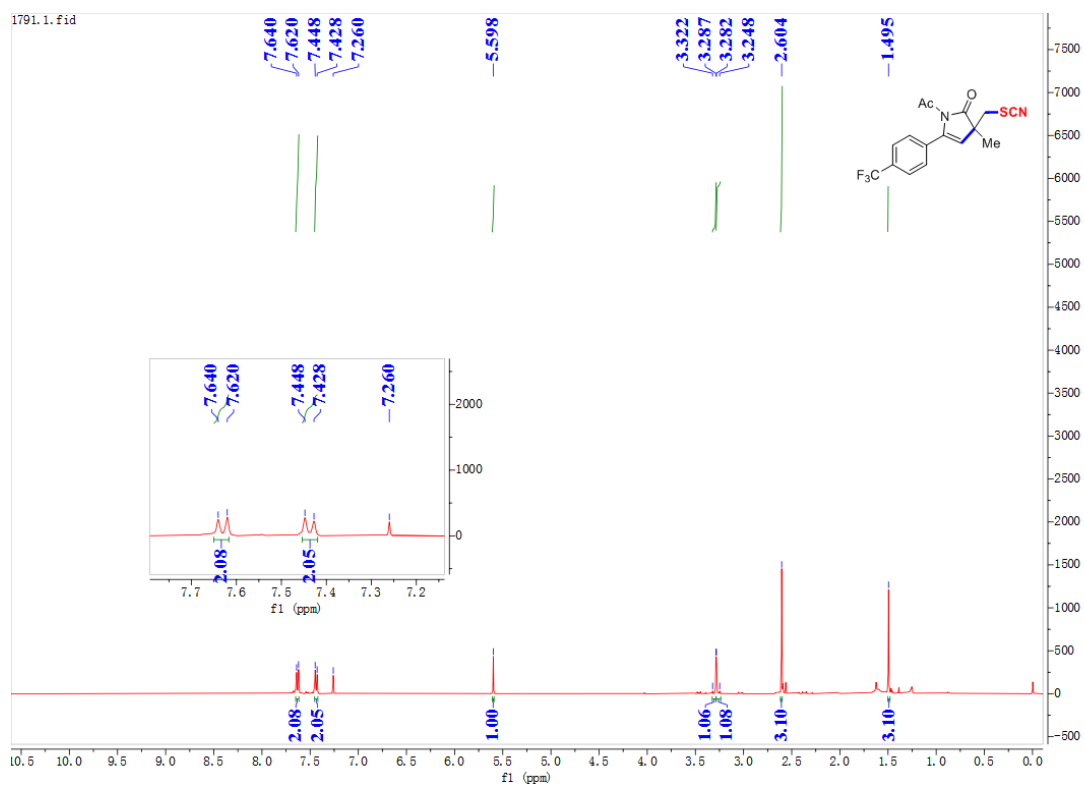

### 35-<sup>13</sup>C NMR

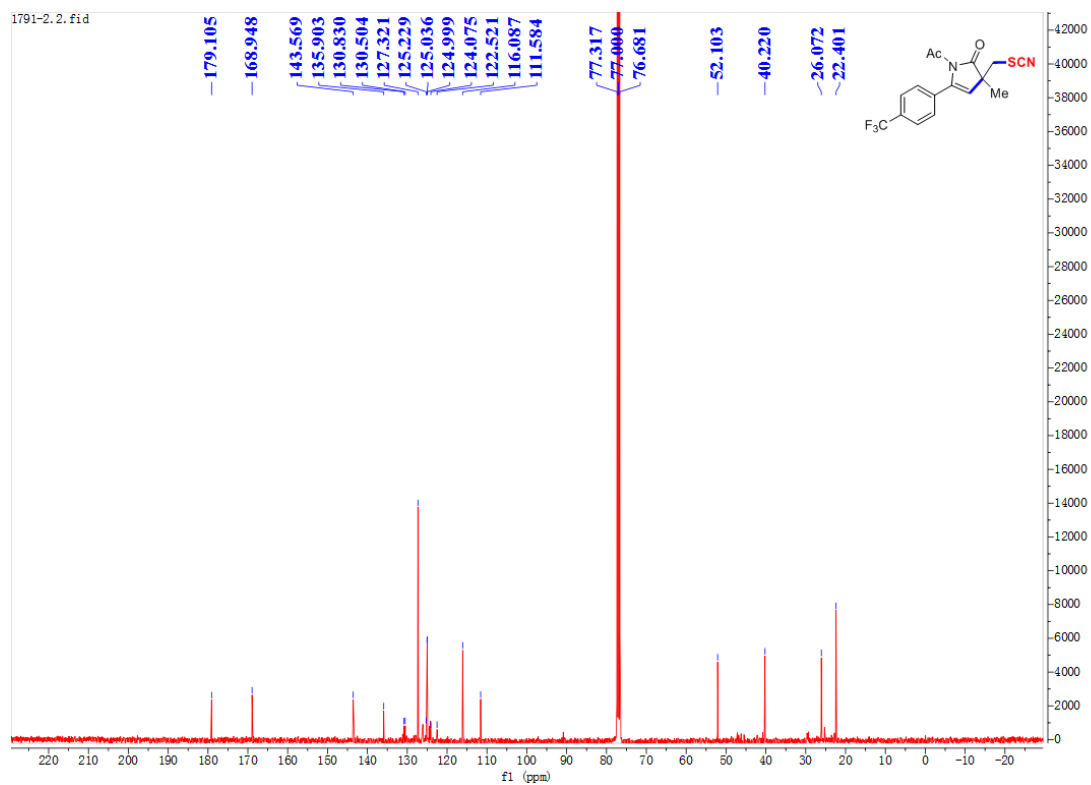

### 35-<sup>19</sup>F NMR

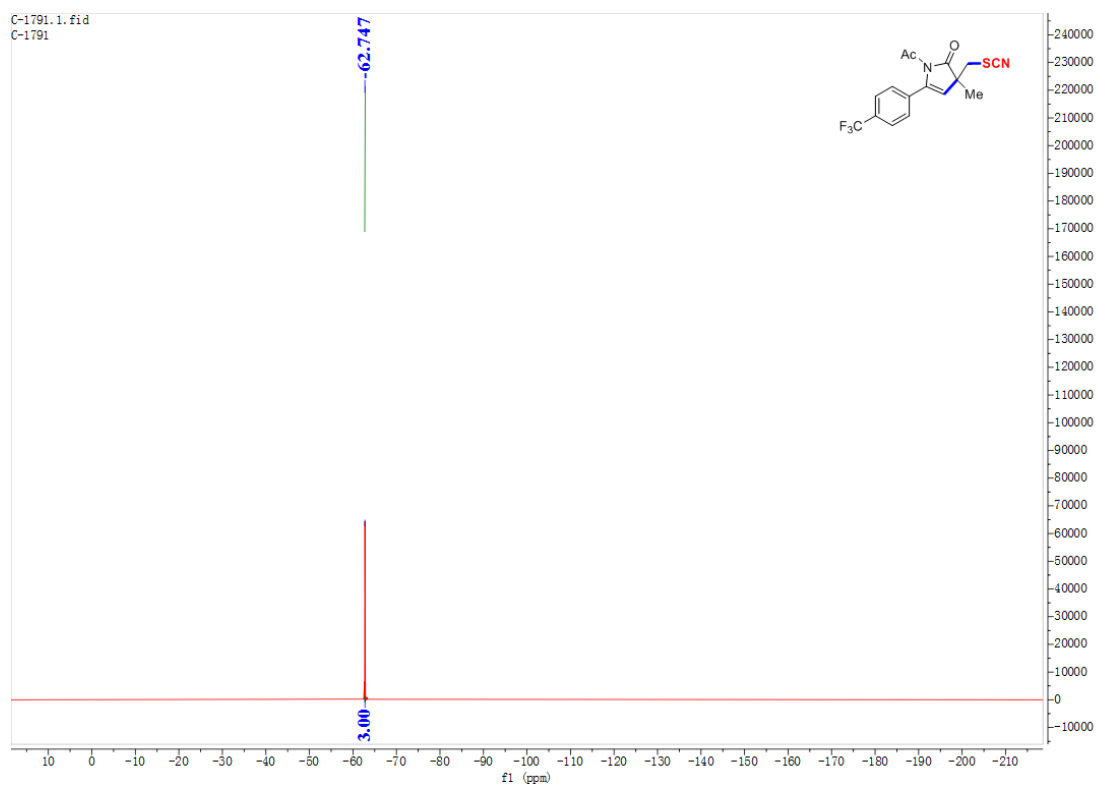

### 36-<sup>1</sup>H NMR

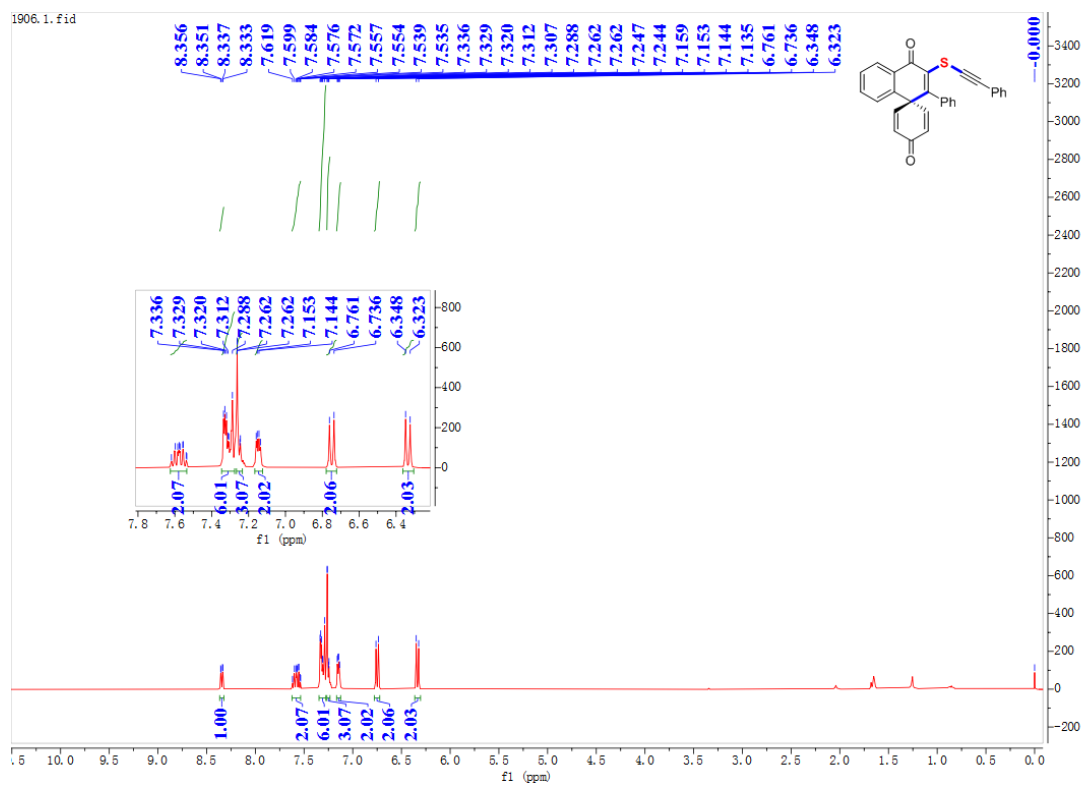

### 36-<sup>13</sup>C NMR

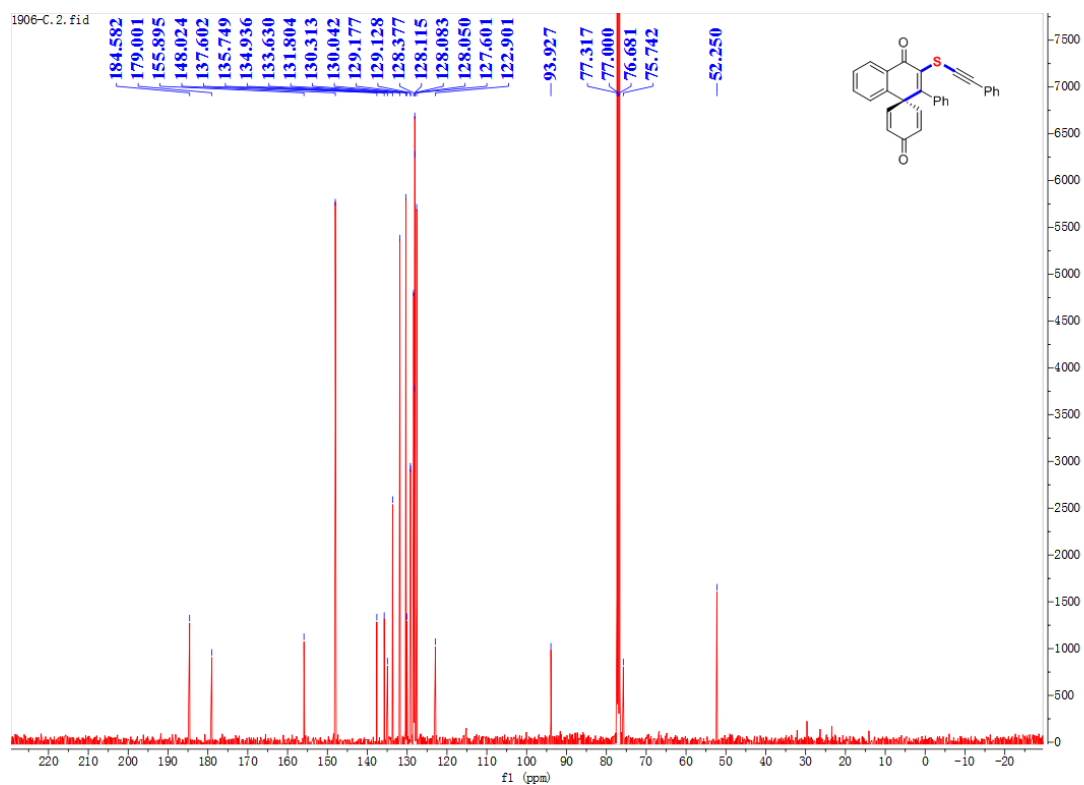

### 37-<sup>1</sup>H NMR

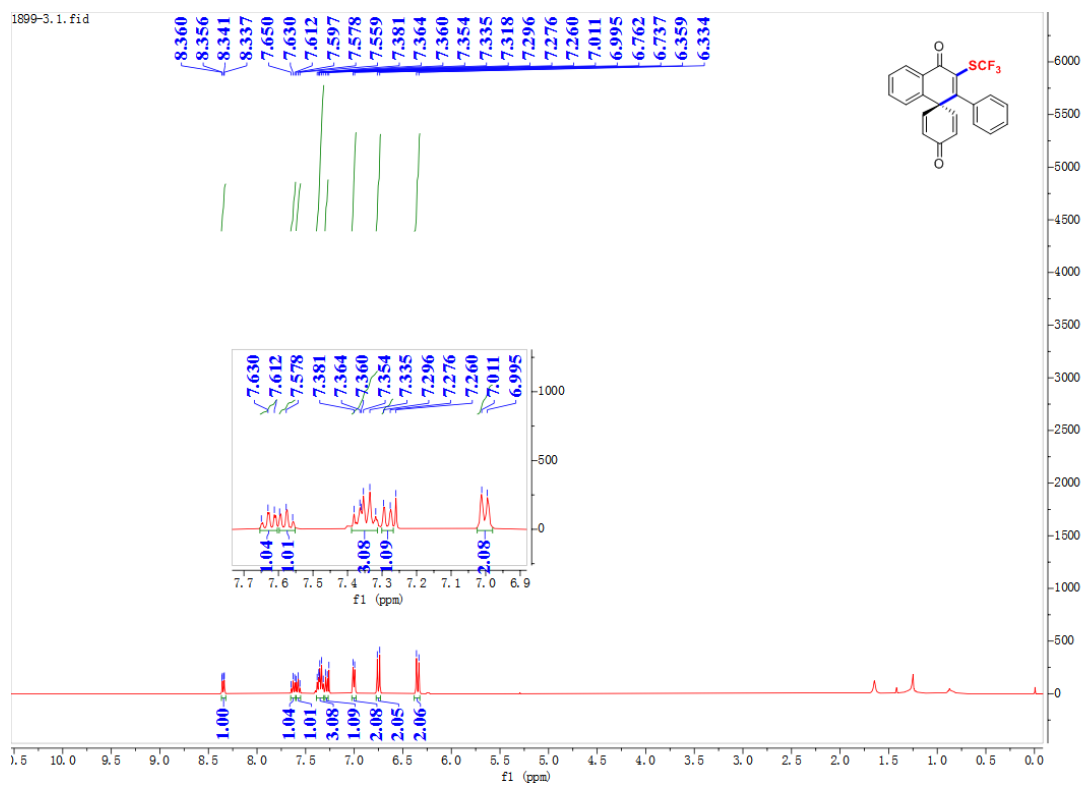

### 37-<sup>13</sup>C NMR

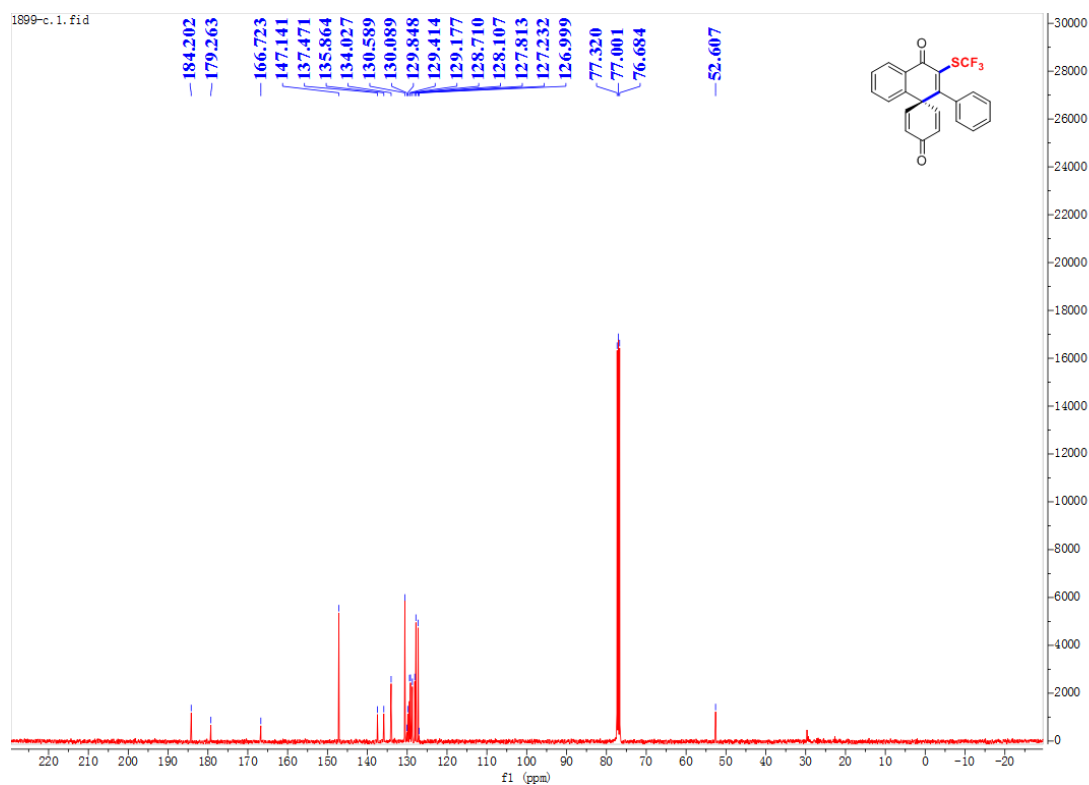

### 37-<sup>19</sup>F NMR

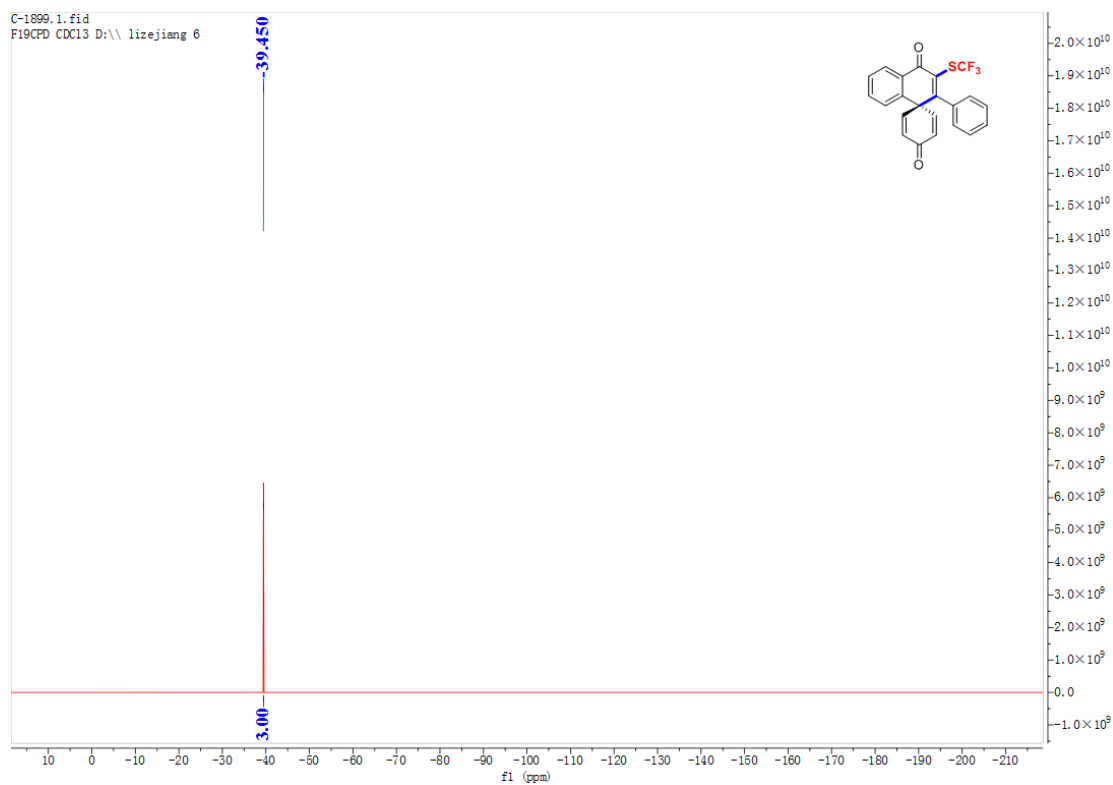

Supplement: d2gc03710f1.pdf [file d2gc03710f1.pdf]
